# Supplementary material
Source: PubMed Central journal article supplement (PMC3973069)
Supplement: 13238_2013_16_MOESM4_ESM.pdf [file 13238_2013_16_MOESM4_ESM.pdf]

| Gene name | Description and ID                                                                                                        | Cardio vs ES | Cardio vs NSC |
|-----------|---------------------------------------------------------------------------------------------------------------------------|--------------|---------------|
| PLN       | phospholamban [Source:HGNC Symbol;Acc:9080]                                                                               | 10.51956298  | 10.53302087   |
| MYL7      | myosin, light chain 7, regulatory [Source:HGNC Symbol;Acc:21719]                                                          | 9.683048044  | 10.96719567   |
| SMPX      | small muscle protein, X-linked [Source:HGNC Symbol;Acc:11122]                                                             | 9.91336154   | 9.678290914   |
| MYH6      | myosin, heavy chain 6, cardiac muscle, alpha [Source:HGNC Symbol;Acc:7576]                                                | 9.518535857  | 9.794227963   |
| MYO22     | myozenin 2 [Source:HGNC Symbol;Acc:1330]                                                                                  | 9.48535322   | 9.510284971   |
| MYL2      | myosin, light chain 2, regulatory, cardiac, slow [Source:HGNC Symbol;Acc:7583]                                            | 9.4230166    | 9.526811594   |
| SYNPO2L   | synaptopodin 2-like [Source:HGNC Symbol;Acc:23532]                                                                        | 9.25673506   | 9.420535272   |
| CSR3P3    | cysteine and glycine-rich protein 3 (cardiac LIM protein) [Source:HGNC Symbol;Acc:2472]                                   | 9.149525101  | 9.187714594   |
| TTN       | titin [Source:HGNC Symbol;Acc:12403]                                                                                      | 9.140593819  | 9.74528868    |
| UNC45B    | unc-45 homolog B (C. elegans) [Source:HGNC Symbol;Acc:14304]                                                              | 9.020141934  | 9.030576104   |
| MYL4      | myosin, light chain 4, alkali; atrial, embryonic [Source:HGNC Symbol;Acc:7585]                                            | 9.22112583   | 9.002175408   |
| LDB3      | LIM domain binding 3 [Source:HGNC Symbol;Acc:15710]                                                                       | 8.929639919  | 8.979982833   |
| MYH7      | myosin, heavy chain 7, cardiac muscle, beta [Source:HGNC Symbol;Acc:7577]                                                 | 8.704774119  | 8.720207235   |
| ANKRD1    | ankyrin repeat domain 1 (cardiac muscle) [Source:HGNC Symbol;Acc:15819]                                                   | 9.714009013  | 8.638574866   |
| NPPB      | natriuretic peptide B [Source:HGNC Symbol;Acc:7940]                                                                       | 8.477789119  | 8.589353528   |
| TNNT2     | troponin T type 2 (cardiac) [Source:HGNC Symbol;Acc:11949]                                                                | 8.452019224  | 9.944182113   |
| NPNT      | nephronectin [Source:HGNC Symbol;Acc:27405]                                                                               | 8.250716674  | 8.31867258    |
| HSPB3     | heat shock 27kDa protein 3 [Source:HGNC Symbol;Acc:5248]                                                                  | 8.452281116  | 8.141237584   |
| HOPX      | HOP homeobox [Source:HGNC Symbol;Acc:24961]                                                                               | 8.250478735  | 8.087433669   |
| GATA6     | GATA binding protein 6 [Source:HGNC Symbol;Acc:4174]                                                                      | 8.012008327  | 8.048913487   |
| NPPA      | natriuretic peptide A [Source:HGNC Symbol;Acc:7939]                                                                       | 7.983519001  | 8.03271611    |
| TNNC1     | troponin C type 1 (slow) [Source:HGNC Symbol;Acc:11943]                                                                   | 7.817135367  | 9.713527394   |
| ACTN2     | actinin, alpha 2 [Source:HGNC Symbol;Acc:164]                                                                             | 7.784577156  | 9.089164511   |
| SMYD1     | SET and MYND domain containing 1 [Source:HGNC Symbol;Acc:20986]                                                           | 7.648559811  | 7.804898231   |
| POPDC2    | popye domain containing 2 [Source:HGNC Symbol;Acc:17648]                                                                  | 8.402616293  | 7.562352603   |
| TRIM55    | tripartite motif containing 55 [Source:HGNC Symbol;Acc:14215]                                                             | 7.373137025  | 7.267597143   |
| CDKN2B    | cyclin-dependent kinase inhibitor 2B (p15, inhibits CDK4) [Source:HGNC Symbol;Acc:1788]                                   | 7.551247101  | 7.236497703   |
| MYL3      | myosin, light chain 3, alkali; ventricular, skeletal, slow [Source:HGNC Symbol;Acc:7584]                                  | 7.246851697  | 7.221066118   |
| LRRC10    | leucine rich repeat containing 10 [Source:HGNC Symbol;Acc:20264]                                                          | 7.323030049  | 7.188206433   |
| SPHKAP    | SPHK1 interactor, AKAP domain containing [Source:HGNC Symbol;Acc:30619]                                                   | 7.330259468  | 7.168626202   |
| MYLK3     | myosin light chain kinase 3 [Source:HGNC Symbol;Acc:29826]                                                                | 7.250097452  | 7.07127301    |
| LMOD2     | leiomodin 2 (cardiac) [Source:HGNC Symbol;Acc:6648]                                                                       | 7.044116937  | 7.201199056   |
| GATA4     | GATA binding protein 4 [Source:HGNC Symbol;Acc:4173]                                                                      | 7.037629174  | 7.08958716    |
| TECLR     | trans-2,3-enoyl-CoA reductase-like [Source:HGNC Symbol;Acc:27365]                                                         | 7.193736054  | 7.019114275   |
| HAPLN1    | hyaluronan and proteoglycan link protein 1 [Source:HGNC Symbol;Acc:2380]                                                  | 6.990331264  | 7.059102954   |
| XIRP1     | xin actin-binding repeat containing 1 [Source:HGNC Symbol;Acc:14301]                                                      | 6.963610313  | 7.210248185   |
| AQP1      | aquaporin 1 (Colton blood group) [Source:HGNC Symbol;Acc:633]                                                             | 7.177085607  | 6.946817667   |
| FILIP1    | filamin A interacting protein 1 [Source:HGNC Symbol;Acc:21015]                                                            | 6.920428571  | 7.794390913   |
| DUSP27    | dual specificity phosphatase 27 (putative) [Source:HGNC Symbol;Acc:25034]                                                 | 6.857012082  | 7.013080847   |
| IGFBP7    | insulin-like growth factor binding protein 7 [Source:HGNC Symbol;Acc:5476]                                                | 8.452781256  | 6.784095644   |
| SYTL5     | synaptotagmin-like 5 [Source:HGNC Symbol;Acc:15589]                                                                       | 6.76385208   | 6.888909035   |
| POSTN     | periostin, osteoblast specific factor [Source:HGNC Symbol;Acc:16953]                                                      | 8.213897694  | 6.707659534   |
| TNNI1     | troponin I type 1 (skeletal, slow) [Source:HGNC Symbol;Acc:11945]                                                         | 6.705106323  | 6.794815577   |
| PLCXD3    | phosphatidylinositol-specific phospholipase C, X domain containing 3 [Source:HGNC Symbol;Acc:31822]                       | 7.092591209  | 6.698815928   |
| MYOCD     | myocardin [Source:HGNC Symbol;Acc:16067]                                                                                  | 6.69624243   | 6.908026166   |
| APOBEC2   | apolipoprotein B mRNA editing enzyme, catalytic polypeptide-like 2 [Source:HGNC Symbol;Acc:605]                           | 6.833633349  | 6.664638177   |
| RYR2      | ryanodine receptor 2 (cardiac) [Source:HGNC Symbol;Acc:10484]                                                             | 6.778031068  | 6.628316321   |
| MASP1     | mannan-binding lectin serine peptidase 1 (C4/C2 activating component of Ra-reactive factor) [Source:HGNC Symbol;Acc:6901] | 7.240842303  | 6.569487061   |
| TRIM63    | tripartite motif containing 63, E3 ubiquitin protein ligase [Source:HGNC Symbol;Acc:16007]                                | 6.500906584  | 6.587652769   |
| HAND2     | heart and neural crest derivatives expressed 2 [Source:HGNC Symbol;Acc:4808]                                              | 6.425795574  | 6.411606651   |
| CASQ2     | calsequestrin 2 (cardiac muscle) [Source:HGNC Symbol;Acc:1513]                                                            | 7.204662419  | 6.365908148   |
| HSPB7     | heat shock 27kDa protein family, member 7 (cardiovascular) [Source:HGNC Symbol;Acc:5249]                                  | 6.447867991  | 6.295762763   |
| RCS1      | RCS1 domain containing 1 [Source:HGNC Symbol;Acc:28310]                                                                   | 6.275273643  | 6.600905919   |
| TRDN      | triadin [Source:HGNC Symbol;Acc:12261]                                                                                    | 6.262050507  | 7.208815318   |
| CORIN     | corin, serine peptidase [Source:HGNC Symbol;Acc:19012]                                                                    | 7.653017074  | 6.231240579   |
| ACE2      | angiotensin I converting enzyme (peptidyl-dipeptidase A) 2 [Source:HGNC Symbol;Acc:13557]                                 | 6.206629969  | 6.300730869   |
| SERPINA1  | serpin peptidase inhibitor, clade A (alpha-1 antitrypsin, antitrypsin), member 1 [Source:HGNC Symbol;Acc:8941]            | 6.304037302  | 6.205224228   |
| MYBPC3    | myosin binding protein C, cardiac [Source:HGNC Symbol;Acc:7551]                                                           | 6.01967711   | 6.115402912   |
| C7        | complement component 7 [Source:HGNC Symbol;Acc:1346]                                                                      | 8.260692108  | 6.01745698    |
| SYNPO2    | synaptopodin 2 [Source:HGNC Symbol;Acc:17732]                                                                             | 5.954817429  | 6.771396362   |
| CAV2      | caveolin 2 [Source:HGNC Symbol;Acc:1528]                                                                                  | 5.940893529  | 6.328288119   |
| CRYAB     | crystallin, alpha B [Source:HGNC Symbol;Acc:2389]                                                                         | 5.935066651  | 6.305402948   |
| MYOM1     | myomesin 1, 185kDa [Source:HGNC Symbol;Acc:7613]                                                                          | 5.928375111  | 5.942358498   |
| ASB2      | ankyrin repeat and SOCS box containing 2 [Source:HGNC Symbol;Acc:16012]                                                   | 5.906016606  | 6.011695356   |
| GJA3      | gap junction protein, alpha 3, 46kDa [Source:HGNC Symbol;Acc:4277]                                                        | 5.899047054  | 7.122944061   |
| GHR       | growth hormone receptor [Source:HGNC Symbol;Acc:2463]                                                                     | 6.524302471  | 5.888957933   |
| BB55      | Bardet-Biedl syndrome 5 [Source:HGNC Symbol;Acc:970]                                                                      | 7.085189078  | 5.861046633   |
| NEXN      | nexilin (F actin binding protein) [Source:HGNC Symbol;Acc:29557]                                                          | 6.017296052  | 5.851277932   |
| MFAP5     | microfibrillar associated protein 5 [Source:HGNC Symbol;Acc:29673]                                                        | 5.833873116  | 6.09428939    |
| MGP       | matrix Gla protein [Source:HGNC Symbol;Acc:7060]                                                                          | 5.808147477  | 5.784055364   |
| RSPO3     | R-spondin 3 [Source:HGNC Symbol;Acc:20866]                                                                                | 5.838938992  | 5.764014019   |
| TNNI3K    | FPGT-TNNI3K fusion protein isoform b [Source:RefSeq peptide;Acc:NP_001186256]                                             | 5.743743518  | 5.94151794    |
| CKMT2     | creatine kinase, mitochondrial 2 (sarcomeric) [Source:HGNC Symbol;Acc:1996]                                               | 5.731750639  | 6.977746462   |

|           |                                                                                                                             |             |             |
|-----------|-----------------------------------------------------------------------------------------------------------------------------|-------------|-------------|
| MICAL2    | microtubule associated monooxygenase, calponin and LIM domain containing 2 [Source:HGNC Symbol;Acc:24693]                   | 5.724084653 | 6.282215087 |
| PDLIM5    | PDZ and LIM domain 5 [Source:HGNC Symbol;Acc:17468]                                                                         | 6.28506473  | 5.702176279 |
| SULT1E1   | sulfotransferase family 1E, estrogen-preferring, member 1 [Source:HGNC Symbol;Acc:11377]                                    | 5.695016886 | 5.730610594 |
| CLIC5     | chloride intracellular channel 5 [Source:HGNC Symbol;Acc:13517]                                                             | 5.710061366 | 5.683038375 |
| PDE4DIP   | TNNI3 interacting kinase [Source:HGNC Symbol;Acc:19661]                                                                     | 5.651810887 | 5.763026873 |
| C1orf105  | chromosome 1 open reading frame 105 [Source:HGNC Symbol;Acc:29591]                                                          | 5.880343194 | 5.558800703 |
| MMP1      | matrix metalloproteinase 1 (interstitial collagenase) [Source:HGNC Symbol;Acc:7155]                                         | 5.783961585 | 5.542137796 |
| RELN      | reelin [Source:HGNC Symbol;Acc:9957]                                                                                        | 7.053337661 | 5.536651466 |
| LEFTY2    | left-right determination factor 2 [Source:HGNC Symbol;Acc:3122]                                                             | 5.533921939 | 6.504193495 |
| CSorf46   | chromosome 5 open reading frame 46 [Source:HGNC Symbol;Acc:33768]                                                           | 5.54128843  | 5.528948581 |
| ENO3      | enolase 3 (beta, muscle) [Source:HGNC Symbol;Acc:3354]                                                                      | 5.483619264 | 6.911731563 |
| ACTA2     | actin, alpha 2, smooth muscle, aorta [Source:HGNC Symbol;Acc:130]                                                           | 5.425159564 | 5.586194259 |
| CBLN2     | cerebellin 2 precursor [Source:HGNC Symbol;Acc:1544]                                                                        | 5.558760577 | 5.411758764 |
| GSG1      | germ cell associated 1 [Source:HGNC Symbol;Acc:19716]                                                                       | 5.38154256  | 5.541766307 |
| CYP2J2    | cytochrome P450, family 2, subfamily J, polypeptide 2 [Source:HGNC Symbol;Acc:2634]                                         | 5.3644271   | 6.373027382 |
| JPH2      | junctophilin 2 [Source:HGNC Symbol;Acc:14202]                                                                               | 5.503950869 | 5.356740993 |
| MYO18B    | myosin XVIIIIB [Source:HGNC Symbol;Acc:18150]                                                                               | 5.35314239  | 5.786420245 |
| C21orf7   | chromosome 21 open reading frame 7 [Source:HGNC Symbol;Acc:16457]                                                           | 5.341191568 | 5.389991449 |
| ABRA      | actin-binding Rho activating protein [Source:HGNC Symbol;Acc:30655]                                                         | 5.464788018 | 5.340692628 |
| SLC8A1    | solute carrier family 8 (sodium/calcium exchanger), member 1 [Source:HGNC Symbol;Acc:11068]                                 | 6.697277985 | 5.311511454 |
| IGFBP3    | insulin-like growth factor binding protein 3 [Source:HGNC Symbol;Acc:5472]                                                  | 5.281587923 | 5.343524727 |
| NXK2-5    | NK2 homeobox 5 [Source:HGNC Symbol;Acc:2488]                                                                                | 5.276619134 | 5.318893908 |
| EDN1      | endothelin 1 [Source:HGNC Symbol;Acc:3176]                                                                                  | 5.23121772  | 5.618159105 |
| LOC653513 | phosphodiesterase 4D interacting protein pseudogene                                                                         | 5.212381125 | 5.198816559 |
| C15orf52  | chromosome 15 open reading frame 52 [Source:HGNC Symbol;Acc:33488]                                                          | 5.192978911 | 5.918630472 |
| EYA4      | eyes absent homolog 4 (Drosophila) [Source:HGNC Symbol;Acc:3522]                                                            | 5.832521575 | 5.160979898 |
| DGKI      | diacylglycerol kinase, iota [Source:HGNC Symbol;Acc:2855]                                                                   | 5.776656915 | 5.151648358 |
| TBX5      | T-box 5 [Source:HGNC Symbol;Acc:11604]                                                                                      | 5.107802724 | 5.14740947  |
| ITGB1BP2  | integrin beta 1 binding protein (melusin) 2 [Source:HGNC Symbol;Acc:6154]                                                   | 6.275810197 | 5.097896102 |
| SLC5A1    | solute carrier family 5 (sodium/glucose cotransporter), member 1 [Source:HGNC Symbol;Acc:11036]                             | 5.219318659 | 5.079557014 |
| GPCR5A    | G protein-coupled receptor, family C, group 5, member A [Source:HGNC Symbol;Acc:9836]                                       | 5.072541896 | 5.181596195 |
| INHBA     | inhibin, beta A [Source:HGNC Symbol;Acc:6066]                                                                               | 5.147059611 | 5.045977615 |
| PLCL1     | phospholipase C-like 1 [Source:HGNC Symbol;Acc:9063]                                                                        | 5.952187796 | 5.041382625 |
| BVES      | blood vessel epicardial substance [Source:HGNC Symbol;Acc:1152]                                                             | 5.552883117 | 5.036801337 |
| VCAM1     | vascular cell adhesion molecule 1 [Source:HGNC Symbol;Acc:12663]                                                            | 7.651247496 | 4.999369044 |
| TGM2      | transglutaminase 2 (C polypeptide, protein-glutamine-gamma-glutamyltransferase) [Source:HGNC Symbol;Acc:11778]              | 7.629746794 | 4.976532929 |
| RGS5      | regulator of G-protein signaling 5 [Source:HGNC Symbol;Acc:10001]                                                           | 4.965997416 | 5.729400235 |
| GUCY1A3   | guanylate cyclase 1, soluble, alpha 3 [Source:HGNC Symbol;Acc:4685]                                                         | 7.990587542 | 4.961909975 |
| FRMD3     | FERM domain containing 3 [Source:HGNC Symbol;Acc:24125]                                                                     | 6.174420569 | 4.960405566 |
| ADAMT59   | ADAM metalloproteinase with thrombospondin type 1 motif, 9 [Source:HGNC Symbol;Acc:13202]                                   | 5.788228423 | 4.955851478 |
| FLRT2     | fibronectin leucine rich transmembrane protein 2 [Source:HGNC Symbol;Acc:3761]                                              | 4.94852864  | 5.380600175 |
| TM4SF1    | transmembrane 4 L six family member 1 [Source:HGNC Symbol;Acc:11853]                                                        | 4.93883911  | 4.977312044 |
| FABP3     | fatty acid binding protein 3, muscle and heart (mammary-derived growth inhibitor) [Source:HGNC Symbol;Acc:3557]             | 4.915996895 | 6.836111197 |
| CASQ1     | calsequestrin 1 (fast-twitch, skeletal muscle) [Source:HGNC Symbol;Acc:1512]                                                | 4.915785061 | 5.22922426  |
| MYH7B     | myosin, heavy chain 7B, cardiac muscle, beta [Source:HGNC Symbol;Acc:15906]                                                 | 4.901631607 | 4.96658216  |
| TMOD1     | tropomodulin 1 [Source:HGNC Symbol;Acc:11871]                                                                               | 4.886436396 | 5.764246459 |
| CORO6     | coronin 6 [Source:HGNC Symbol;Acc:21356]                                                                                    | 4.883743475 | 5.17894029  |
| CACNA1C   | calcium channel, voltage-dependent, L type, alpha 1C subunit [Source:HGNC Symbol;Acc:1390]                                  | 4.970909798 | 4.869675683 |
| SERPINE1  | serpin peptidase inhibitor, clade E (nexin, plasminogen activator inhibitor type 1), member 1 [Source:HGNC Symbol;Acc:8583] | 4.860576618 | 6.369659758 |
| MITF      | microphthalmia-associated transcription factor [Source:HGNC Symbol;Acc:7105]                                                | 5.806916971 | 4.842064668 |
| RBM20     | RNA binding motif protein 20 [Source:HGNC Symbol;Acc:27424]                                                                 | 5.48481006  | 4.839849027 |
| LOX       | lysyl oxidase [Source:HGNC Symbol;Acc:6664]                                                                                 | 4.937654527 | 4.777910635 |
| CCDC80    | coiled-coil domain containing 80 [Source:HGNC Symbol;Acc:30649]                                                             | 6.336886176 | 4.767390512 |
| RBM24     | RNA binding motif protein 24 [Source:HGNC Symbol;Acc:21539]                                                                 | 4.7959802   | 4.734891104 |
| BAMBI     | BMP and activin membrane-bound inhibitor homolog (Xenopus laevis) [Source:HGNC Symbol;Acc:30251]                            | 4.689634687 | 5.299232759 |
| LRRC39    | leucine rich repeat containing 39 [Source:HGNC Symbol;Acc:28228]                                                            | 5.429890209 | 4.685294797 |
| CMYA5     | cardiomyopathy associated 5 [Source:HGNC Symbol;Acc:14305]                                                                  | 4.682412295 | 4.726400792 |
| HBEGF     | heparin-binding EGF-like growth factor [Source:HGNC Symbol;Acc:3059]                                                        | 5.018569174 | 4.666490133 |
| PGM5      | phosphoglucomutase 5 [Source:HGNC Symbol;Acc:8908]                                                                          | 5.754383615 | 4.641832281 |
| THBD      | thrombospondin 1 [Source:HGNC Symbol;Acc:11784]                                                                             | 4.617506311 | 4.643280426 |
| NCAM1     | neural cell adhesion molecule 1 [Source:HGNC Symbol;Acc:7656]                                                               | 4.599113395 | 4.670038247 |
| GCOM1     | GRINL1A complex locus 1 [Source:HGNC Symbol;Acc:26424]                                                                      | 4.539596096 | 5.651449572 |
| PITX2     | paired-like homeodomain 2 [Source:HGNC Symbol;Acc:9005]                                                                     | 4.524937516 | 4.997411585 |
| PCDH7     | protocadherin 7 [Source:HGNC Symbol;Acc:8659]                                                                               | 4.829372566 | 4.508221908 |
| CNN1      | calponin 1, basic, smooth muscle [Source:HGNC Symbol;Acc:2155]                                                              | 4.498172036 | 5.205638705 |
| LOXL4     | lysyl oxidase-like 4 [Source:HGNC Symbol;Acc:17171]                                                                         | 4.529037597 | 4.49755327  |
| KLHL31    | kelch-like 31 (Drosophila) [Source:HGNC Symbol;Acc:21353]                                                                   | 4.493443031 | 4.951624707 |
| TIMP3     | TIMP metalloproteinase inhibitor 3 [Source:HGNC Symbol;Acc:11822]                                                           | 8.046071607 | 4.476509638 |
| FGF1      | fibroblast growth factor 1 (acidic) [Source:HGNC Symbol;Acc:3665]                                                           | 4.475200987 | 4.817952431 |
| COL21A1   | collagen, type XXI, alpha 1 [Source:HGNC Symbol;Acc:17025]                                                                  | 4.47384744  | 4.778008173 |
| MB        | myoglobin [Source:HGNC Symbol;Acc:6915]                                                                                     | 4.460138462 | 5.256318105 |
| TPM2      | tropomyosin 2 (beta) [Source:HGNC Symbol;Acc:12011]                                                                         | 6.049999407 | 4.452519754 |

|          |                                                                                                     |             |             |
|----------|-----------------------------------------------------------------------------------------------------|-------------|-------------|
| PPP1R12B | protein phosphatase 1, regulatory subunit 12B [Source:HGNC Symbol;Acc:7619]                         | 5.017316019 | 4.440918736 |
| CALB2    | calbindin 2 [Source:HGNC Symbol;Acc:1435]                                                           | 4.438248408 | 4.496617923 |
| GREM1    | gremlin 1 [Source:HGNC Symbol;Acc:2001]                                                             | 4.435826932 | 4.531978656 |
| CCDC85A  | coiled-coil domain containing 85A [Source:HGNC Symbol;Acc:29400]                                    | 4.628968023 | 4.401310225 |
| DACT1    | dapper, antagonist of beta-catenin, homolog 1 (Xenopus laevis) [Source:HGNC Symbol;Acc:17748]       | 4.371019387 | 4.925309227 |
| FLNC     | filamin C, gamma [Source:HGNC Symbol;Acc:3756]                                                      | 5.199968343 | 4.370411535 |
| POPDC3   | popeye domain containing 3 [Source:HGNC Symbol;Acc:17649]                                           | 4.288096896 | 5.33795594  |
| GADD45B  | growth arrest and DNA-damage-inducible, beta [Source:HGNC Symbol;Acc:4096]                          | 4.283618744 | 4.310003408 |
| CKM      | creatine kinase, muscle [Source:HGNC Symbol;Acc:1994]                                               | 4.274123967 | 4.410938629 |
| PALM2    | paralemmin 2 [Source:HGNC Symbol;Acc:15845]                                                         | 4.401727676 | 4.262473608 |
| RASGRP3  | RAS guanyl releasing protein 3 (calcium and DAG-regulated) [Source:HGNC Symbol;Acc:14545]           | 4.364960221 | 4.250705154 |
| TCEA3    | transcription elongation factor A (SII), 3 [Source:HGNC Symbol;Acc:11615]                           | 4.564334974 | 4.249863147 |
| GLS      | glutaminase [Source:HGNC Symbol;Acc:4331]                                                           | 4.839427882 | 4.240646894 |
| PPARGC1A | peroxisome proliferator-activated receptor gamma, coactivator 1 alpha [Source:HGNC Symbol;Acc:9237] | 4.564589293 | 4.228540981 |
| PGAM2    | phosphoglycerate mutase 2 (muscle) [Source:HGNC Symbol;Acc:8889]                                    | 4.225140363 | 6.089744173 |
| BNC1     | basonuclin 1 [Source:HGNC Symbol;Acc:1081]                                                          | 4.46489     | 4.209971333 |
| LMOD1    | leiomodulin 1 (smooth muscle) [Source:HGNC Symbol;Acc:6647]                                         | 4.191709955 | 4.443053112 |
| PPP1R3C  | protein phosphatase 1, regulatory subunit 3C [Source:HGNC Symbol;Acc:9293]                          | 4.184343092 | 5.377028835 |
| HRC      | histidine rich calcium binding protein [Source:HGNC Symbol;Acc:5178]                                | 4.169851437 | 4.623754598 |
| RNF207   | ring finger protein 207 [Source:HGNC Symbol;Acc:32947]                                              | 4.167994068 | 5.029016329 |
| FAM78A   | family with sequence similarity 78, member A [Source:HGNC Symbol;Acc:25465]                         | 4.167262714 | 4.475770626 |
| NEBL     | nebulin [Source:HGNC Symbol;Acc:16932]                                                              | 4.140315839 | 5.218207647 |
| COL12A1  | collagen, type XII, alpha 1 [Source:HGNC Symbol;Acc:2188]                                           | 4.24254316  | 4.131641057 |
| ANXA8    | annexin A8 [Source:HGNC Symbol;Acc:546]                                                             | 4.108254115 | 4.269978227 |
| AARS01   | alanyl-tRNA synthetase domain containing 1 [Source:HGNC Symbol;Acc:28417]                           | 4.09629024  | 4.49820923  |
| KIF26B   | kinesin family member 26B [Source:HGNC Symbol;Acc:25484]                                            | 5.835828762 | 4.093566301 |
| TMEM40   | transmembrane protein 40 [Source:HGNC Symbol;Acc:25620]                                             | 4.120951024 | 4.088514275 |
| FGF5     | fibroblast growth factor 5 [Source:HGNC Symbol;Acc:3683]                                            | 4.111512767 | 4.084648676 |
| SORBS2   | sorbin and SH3 domain containing 2 [Source:HGNC Symbol;Acc:24098]                                   | 6.346527601 | 4.077064014 |
| C18orf1  | chromosome 18 open reading frame 1 [Source:HGNC Symbol;Acc:1224]                                    | 4.185296877 | 4.071498157 |
| AFP      | alpha-fetoprotein [Source:HGNC Symbol;Acc:317]                                                      | 4.056965484 | 4.653591857 |
| HSPB8    | heat shock 22kDa protein 8 [Source:HGNC Symbol;Acc:30171]                                           | 4.029594886 | 5.333807436 |
| GDF6     | growth differentiation factor 6 [Source:HGNC Symbol;Acc:4221]                                       | 7.375474613 | 4.02922441  |
| SNTA1    | syntrophin, alpha 1 [Source:HGNC Symbol;Acc:11167]                                                  | 4.250711284 | 4.022870927 |
| ALDH1A2  | aldehyde dehydrogenase 1 family, member A2 [Source:HGNC Symbol;Acc:15472]                           | 4.086647853 | 4.018751579 |
| CACNB2   | calcium channel, voltage-dependent, beta 2 subunit [Source:HGNC Symbol;Acc:1402]                    | 4.075539896 | 4.018009687 |
| AGPAT9   | 1-acylglycerol-3-phosphate O-acyltransferase 9 [Source:HGNC Symbol;Acc:28157]                       | 4.007638668 | 4.836101398 |
| C4orf32  | chromosome 4 open reading frame 32 [Source:HGNC Symbol;Acc:26813]                                   | 4.006175244 | 4.608902493 |
| PCDH20   | protocadherin 20 [Source:HGNC Symbol;Acc:14257]                                                     | 3.993009607 | 4.96200615  |
| TAGLN    | transgelin [Source:HGNC Symbol;Acc:11553]                                                           | 3.988337073 | 3.999212863 |
| THBS1    | thrombospondin 1 [Source:HGNC Symbol;Acc:11785]                                                     | 4.47081521  | 3.984513539 |
| COL8A1   | collagen, type VIII, alpha 1 [Source:HGNC Symbol;Acc:2215]                                          | 4.463234596 | 3.98345625  |
| AQP10    | aquaporin 10 [Source:HGNC Symbol;Acc:16029]                                                         | 4.036107495 | 3.966214459 |
| PTH1R    | parathyroid hormone 1 receptor [Source:HGNC Symbol;Acc:9608]                                        | 3.952966248 | 3.995915063 |
| AMIGO2   | adhesion molecule with Ig-like domain 2 [Source:HGNC Symbol;Acc:24073]                              | 3.940535998 | 5.093044961 |
| EMILIN2  | elastin microfibril interfacier 2 [Source:HGNC Symbol;Acc:19881]                                    | 3.937766139 | 5.227801696 |
| YPEL2    | yippee-like 2 (Drosophila) [Source:HGNC Symbol;Acc:18326]                                           | 3.934908722 | 4.743664542 |
| DMD      | dystrophin [Source:HGNC Symbol;Acc:2928]                                                            | 3.934591414 | 4.236926196 |
| CCDC141  | coiled-coil domain containing 141 [Source:HGNC Symbol;Acc:26821]                                    | 3.921679661 | 4.405129209 |
| LMO7     | LIM domain 7 [Source:HGNC Symbol;Acc:6646]                                                          | 3.912279708 | 5.979542544 |
| ACTA1    | actin, alpha 1, skeletal muscle [Source:HGNC Symbol;Acc:129]                                        | 3.909288772 | 5.927630542 |
| TBX3     | T-box 3 [Source:HGNC Symbol;Acc:11602]                                                              | 4.002176689 | 3.898277799 |
| ITGB6    | integrin, beta 6 [Source:HGNC Symbol;Acc:6161]                                                      | 3.996495104 | 3.878322235 |
| SAMD4A   | sterile alpha motif domain containing 4A [Source:HGNC Symbol;Acc:23023]                             | 4.482013086 | 3.853192857 |
| LIMS2    | LIM and senescent cell antigen-like domains 2 [Source:HGNC Symbol;Acc:16084]                        | 3.837574887 | 4.0861631   |
| XPO4     | exportin 4 [Source:HGNC Symbol;Acc:17796]                                                           | 3.828685064 | 4.041548514 |
| GPRIN3   | GPRIN family member 3 [Source:HGNC Symbol;Acc:27733]                                                | 3.815976417 | 3.948232509 |
| FBXO40   | F-box protein 40 [Source:HGNC Symbol;Acc:29816]                                                     | 3.782329162 | 3.841905068 |
| CMAH     | cytidine monophospho-N-acetylneuraminic acid hydroxylase, pseudogene [Source:HGNC Symbol;Acc:2098]  | 3.813634983 | 3.777427829 |
| PRRX1    | paired related homeobox 1 [Source:HGNC Symbol;Acc:9142]                                             | 5.28616409  | 3.777210634 |
| SH3BGR   | SH3 domain binding glutamic acid-rich protein [Source:HGNC Symbol;Acc:10822]                        | 3.775274305 | 5.414330613 |
| ODAM     | odontogenic, ameloblast associated [Source:HGNC Symbol;Acc:26043]                                   | 3.770150841 | 4.000983698 |
| ZFPM2    | zinc finger protein, multitype 2 [Source:HGNC Symbol;Acc:16700]                                     | 6.790240204 | 3.757175873 |
| GAS2     | growth arrest-specific 2 [Source:HGNC Symbol;Acc:4167]                                              | 4.014995108 | 3.749369129 |
| ACTC1    | actin, alpha, cardiac muscle 1 [Source:HGNC Symbol;Acc:143]                                         | 3.734713366 | 6.762926976 |
| TXLNB    | taxilin beta [Source:HGNC Symbol;Acc:21617]                                                         | 4.567009829 | 3.731192855 |
| EXTL1    | exostosins (multiple)-like 1 [Source:HGNC Symbol;Acc:3515]                                          | 3.84245012  | 3.723439576 |
| GPR183   | G protein-coupled receptor 183 [Source:HGNC Symbol;Acc:3128]                                        | 5.493169636 | 3.702574374 |
| SULF1    | sulfatase 1 [Source:HGNC Symbol;Acc:20391]                                                          | 5.09674084  | 3.696635414 |
| MYL9     | myosin, light chain 9, regulatory [Source:HGNC Symbol;Acc:15754]                                    | 3.686553302 | 4.299079977 |
| GPR124   | G protein-coupled receptor 124 [Source:HGNC Symbol;Acc:17849]                                       | 4.503723834 | 3.68301383  |
| COL1A1   | collagen, type I, alpha 1 [Source:HGNC Symbol;Acc:2197]                                             | 3.676693168 | 4.108510574 |
| DKK3     | dickkopf 3 homolog (Xenopus laevis) [Source:HGNC Symbol;Acc:2893]                                   | 3.675077508 | 3.70103591  |
| PRSS35   | protease, serine, 35 [Source:HGNC Symbol;Acc:21387]                                                 | 6.38029479  | 3.659907006 |
| LGI2     | leucine-rich repeat LGI family, member 2 [Source:HGNC Symbol;Acc:18710]                             | 4.638385578 | 3.658732569 |

|           |                                                                                                                   |             |             |
|-----------|-------------------------------------------------------------------------------------------------------------------|-------------|-------------|
| FN1       | fibronectin 1 [Source:HGNC Symbol;Acc:3778]                                                                       | 5.436184474 | 3.653527953 |
| ALPK2     | alpha-kinase 2 [Source:HGNC Symbol;Acc:20565]                                                                     | 8.069528368 | 3.647151766 |
| PRDM6     | PR domain containing 6 [Source:HGNC Symbol;Acc:9350]                                                              | 3.851703099 | 3.639483105 |
| TPM1      | tropomyosin 1 (alpha) [Source:HGNC Symbol;Acc:12010]                                                              | 3.637236226 | 6.143185497 |
| APOA1     | apolipoprotein A-1 [Source:HGNC Symbol;Acc:600]                                                                   | 3.96717492  | 3.629650588 |
| MMP15     | matrix metalloproteinase 15 (membrane-inserted) [Source:HGNC Symbol;Acc:7161]                                     | 3.628150535 | 3.689272699 |
| LBH       | limb bud and heart development homolog (mouse) [Source:HGNC Symbol;Acc:29532]                                     | 4.113576624 | 3.606374943 |
| SYNM      | synemin, intermediate filament protein [Source:HGNC Symbol;Acc:24466]                                             | 4.204370994 | 3.596166759 |
| CDC42EP3  | CDC42 effector protein (Rho GTPase binding) 3 [Source:HGNC Symbol;Acc:16943]                                      | 3.788450748 | 3.589516376 |
| C13orf31  | laccase (multicopper oxidoreductase) domain containing 1 [Source:HGNC Symbol;Acc:26789]                           | 3.564474713 | 4.855031462 |
| PPP1R3A   | protein phosphatase 1, regulatory subunit 3A [Source:HGNC Symbol;Acc:9291]                                        | 3.563366821 | 3.636446622 |
| NIPSNAP3B | nipsnap homolog 3B (C. elegans) [Source:HGNC Symbol;Acc:23641]                                                    | 4.044010104 | 3.56154586  |
| EDNRA     | endothelin receptor type A [Source:HGNC Symbol;Acc:3179]                                                          | 4.530980289 | 3.561002066 |
| FBXO32    | F-box protein 32 [Source:HGNC Symbol;Acc:16731]                                                                   | 4.289660926 | 3.551195378 |
| TBX18     | T-box 18 [Source:HGNC Symbol;Acc:11595]                                                                           | 4.44934012  | 3.541477809 |
| PTPLA     | protein tyrosine phosphatase-like (proline instead of catalytic arginine), member A [Source:HGNC Symbol;Acc:9639] | 3.523972607 | 4.440632464 |
| WT1       | Wilms tumor 1 [Source:HGNC Symbol;Acc:12796]                                                                      | 3.522015935 | 3.576377026 |
| ZPK2      | plakophilin 2 [Source:HGNC Symbol;Acc:9024]                                                                       | 3.518005782 | 5.148726071 |
| KAK       | sterile alpha motif and leucine zipper containing kinase AZK                                                      | 3.84646871  | 3.51298724  |
| C13orf15  | regulator of cell cycle [Source:HGNC Symbol;Acc:20369]                                                            | 4.646950345 | 3.508402146 |
| HIST2H2BE | histone cluster 2, H2be [Source:HGNC Symbol;Acc:4760]                                                             | 4.852112465 | 3.500020323 |
| SYPL2     | synaptophysin-like 2 [Source:HGNC Symbol;Acc:27638]                                                               | 3.495341917 | 3.73749005  |
| EPST1     | epithelial stromal interaction 1 (breast) [Source:HGNC Symbol;Acc:16465]                                          | 3.492899429 | 3.953554894 |
| CXCL14    | chemokine (C-X-C motif) ligand 14 [Source:HGNC Symbol;Acc:10640]                                                  | 3.488075927 | 4.749968412 |
| STX11     | syntaxin 11 [Source:HGNC Symbol;Acc:11429]                                                                        | 3.711269513 | 3.477239434 |
| ADPRHL1   | ADP-ribosylhydrolase like 1 [Source:HGNC Symbol;Acc:21303]                                                        | 3.861605168 | 3.467278111 |
| EFEMP2    | EGF containing fibulin-like extracellular matrix protein 2 [Source:HGNC Symbol;Acc:3219]                          | 3.464156991 | 3.95874873  |
| ADAM19    | ADAM metalloproteinase domain 19 [Source:HGNC Symbol;Acc:197]                                                     | 3.458750579 | 4.221630995 |
| DSC3      | desmocollin 3 [Source:HGNC Symbol;Acc:3037]                                                                       | 3.453827091 | 4.537216483 |
| KANK4     | KN motif and ankyrin repeat domains 4 [Source:HGNC Symbol;Acc:27263]                                              | 3.511430214 | 3.444812872 |
| GATA5     | GATA binding protein 5 [Source:HGNC Symbol;Acc:15802]                                                             | 3.96816957  | 3.435379919 |
| CASZ1     | castor zinc finger 1 [Source:HGNC Symbol;Acc:26002]                                                               | 3.429145917 | 3.43108908  |
| PLEKH7    | pleckstrin homology domain containing, family A member 7 [Source:HGNC Symbol;Acc:27049]                           | 3.591801679 | 3.418910691 |
| FBN2      | fibrillin 2 [Source:HGNC Symbol;Acc:3604]                                                                         | 4.08852035  | 3.418469983 |
| RFTN1     | raftlin, lipid raft linker 1 [Source:HGNC Symbol;Acc:30278]                                                       | 4.65327228  | 3.409564904 |
| CDKN1A    | cyclin-dependent kinase inhibitor 1A (p21, Cip1) [Source:HGNC Symbol;Acc:1784]                                    | 4.214325703 | 3.398875097 |
| GPR126    | G protein-coupled receptor 126 [Source:HGNC Symbol;Acc:13841]                                                     | 4.467689668 | 3.398686907 |
| TMEM56    | transmembrane protein 56 [Source:HGNC Symbol;Acc:26477]                                                           | 3.383261865 | 3.466118039 |
| G0S2      | G0/G1switch 2 [Source:HGNC Symbol;Acc:30229]                                                                      | 3.369870248 | 3.892070786 |
| KCNAS     | potassium voltage-gated channel, shaker-related subfamily, member 5 [Source:HGNC Symbol;Acc:6224]                 | 3.363810594 | 3.742087652 |
| PDLIM3    | PDZ and LIM domain 3 [Source:HGNC Symbol;Acc:20767]                                                               | 4.193211975 | 3.361789589 |
| FAM134B   | family with sequence similarity 134, member B [Source:HGNC Symbol;Acc:25964]                                      | 3.874440157 | 3.344425727 |
| BMP5      | bone morphogenetic protein 5 [Source:HGNC Symbol;Acc:1072]                                                        | 5.521284392 | 3.341466403 |
| GMPR      | guanosine monophosphate reductase [Source:HGNC Symbol;Acc:4376]                                                   | 3.333102976 | 4.171587453 |
| PTRF      | polymerase I and transcript release factor [Source:HGNC Symbol;Acc:9688]                                          | 3.33288344  | 4.701753772 |
| MPPED2    | metallophosphoesterase domain containing 2 [Source:HGNC Symbol;Acc:1180]                                          | 3.332234965 | 5.302924734 |
| C17orf91  | MIR22 host gene (non-protein coding) [Source:HGNC Symbol;Acc:28219]                                               | 4.804595663 | 3.319238447 |
| TGFB1     | transforming growth factor, beta-induced, 68kDa [Source:HGNC Symbol;Acc:11771]                                    | 3.315934365 | 5.927413583 |
| VEGFC     | vascular endothelial growth factor C [Source:HGNC Symbol;Acc:12682]                                               | 3.875628672 | 3.311070597 |
| CSRP1     | cysteine and glycine-rich protein 1 [Source:HGNC Symbol;Acc:2469]                                                 | 4.117052485 | 3.287666063 |
| INPP4B    | inositol polyphosphate-4-phosphatase, type II, 105kDa [Source:HGNC Symbol;Acc:6075]                               | 3.282013625 | 3.42244494  |
| COL5A1    | collagen, type V, alpha 1 [Source:HGNC Symbol;Acc:2209]                                                           | 4.22149459  | 3.279249727 |
| C11orf9   | chromosome 11 open reading frame 9 [Source:HGNC Symbol;Acc:1181]                                                  | 3.800948335 | 3.275385438 |
| PEAR1     | platelet endothelial aggregation receptor 1 [Source:HGNC Symbol;Acc:33631]                                        | 3.386738772 | 3.272098942 |
| CAV1      | caveolin 1, caveolae protein, 22kDa [Source:HGNC Symbol;Acc:1527]                                                 | 3.269144181 | 3.858154017 |
| SYNPO     | synaptopodin [Source:HGNC Symbol;Acc:30672]                                                                       | 4.707407304 | 3.267633482 |
| DTNA      | dystrobrevin, alpha [Source:HGNC Symbol;Acc:3057]                                                                 | 3.266816176 | 3.704597497 |
| C6orf114  | glucose-fructose oxidoreductase domain containing 1 [Source:HGNC Symbol;Acc:21096]                                | 3.301978594 | 3.264685195 |
| TMEM173   | transmembrane protein 173 [Source:HGNC Symbol;Acc:27962]                                                          | 3.532873504 | 3.262586904 |
| SLCO3A1   | solute carrier organic anion transporter family, member 3A1 [Source:HGNC Symbol;Acc:10952]                        | 3.27079601  | 3.260297636 |
| FSTL3     | folliculin-like 3 (secreted glycoprotein) [Source:HGNC Symbol;Acc:3973]                                           | 3.260175943 | 3.395860142 |
| EPAS1     | endothelial PAS domain protein 1 [Source:HGNC Symbol;Acc:3374]                                                    | 3.252138559 | 3.926120259 |
| MUM1L1    | melanoma associated antigen (mutated) 1-like 1 [Source:HGNC Symbol;Acc:26583]                                     | 3.711043974 | 3.249818718 |
| MATN2     | matrilin 2 [Source:HGNC Symbol;Acc:6908]                                                                          | 3.241129232 | 5.815188161 |
| CHSY3     | chondroitin sulfate synthase 3 [Source:HGNC Symbol;Acc:24293]                                                     | 3.368216931 | 3.231545177 |
| PNKD      | paroxysmal nonkinesigenic dyskinesia [Source:HGNC Symbol;Acc:9153]                                                | 3.226127486 | 3.66970193  |
| ADAMT55   | ADAM metalloproteinase with thrombospondin type 1 motif, 5 [Source:HGNC Symbol;Acc:221]                           | 3.223557003 | 3.347141329 |
| CTGF      | connective tissue growth factor [Source:HGNC Symbol;Acc:2500]                                                     | 3.524139003 | 3.220348495 |
| AGT       | angiotensinogen (serpin peptidase inhibitor, clade A, member 8) [Source:HGNC Symbol;Acc:333]                      | 5.540128866 | 3.218657637 |
| AHNAK2    | AHNAK nucleoprotein 2 [Source:HGNC Symbol;Acc:20125]                                                              | 3.40214299  | 3.218444575 |
| STAT4     | signal transducer and activator of transcription 4 [Source:HGNC Symbol;Acc:11365]                                 | 3.461616225 | 3.213801878 |
| NEK7      | NIMA (never in mitosis gene a)-related kinase 7 [Source:HGNC Symbol;Acc:13386]                                    | 3.426497271 | 3.208340875 |
| DLC1      | deleted in liver cancer 1 [Source:HGNC Symbol;Acc:2897]                                                           | 4.976104762 | 3.206743295 |
| EHD3      | EH-domain containing 3 [Source:HGNC Symbol;Acc:3244]                                                              | 3.206292172 | 3.535477133 |
| ARSJ      | arylsulfatase family, member J [Source:HGNC Symbol;Acc:26286]                                                     | 3.189485951 | 4.395517834 |

|          |                                                                                                                       |             |             |
|----------|-----------------------------------------------------------------------------------------------------------------------|-------------|-------------|
| TSPAN32  | tetraspanin 32 [Source:HGNC Symbol;Acc:13410]                                                                         | 3.269662147 | 3.184953553 |
| ATXN1    | ataxin 1 [Source:HGNC Symbol;Acc:10548]                                                                               | 4.971619352 | 3.184495447 |
| TBX2     | T-box 2 [Source:HGNC Symbol;Acc:11597]                                                                                | 3.237111289 | 3.182624548 |
| PRICKLE1 | prickle homolog 1 (Drosophila) [Source:HGNC Symbol;Acc:17019]                                                         | 3.168728773 | 5.003646824 |
| ITGAV    | integrin, alpha V [Source:HGNC Symbol;Acc:6150]                                                                       | 3.14908452  | 3.559856802 |
| TM4SF4   | transmembrane 4 L six family member 4 [Source:HGNC Symbol;Acc:11856]                                                  | 3.305096062 | 3.148017993 |
| GFOD1    | glucose-fructose oxidoreductase domain containing 1 [Source:HGNC Symbol;Acc:21096]                                    | 3.146192522 | 3.32191812  |
| SLC4A4   | solute carrier family 4, sodium bicarbonate cotransporter, member 4 [Source:HGNC Symbol;Acc:11030]                    | 4.415763617 | 3.142500731 |
| SLMAP    | sarcolemma associated protein [Source:HGNC Symbol;Acc:16643]                                                          | 3.140633747 | 3.658860387 |
| DCN      | decorin [Source:HGNC Symbol;Acc:2705]                                                                                 | 7.792488573 | 3.12303916  |
| ASPH     | aspartate beta-hydroxylase [Source:HGNC Symbol;Acc:757]                                                               | 4.281290866 | 3.122582294 |
| PPIC     | peptidylprolyl isomerase C (cyclophilin C) [Source:HGNC Symbol;Acc:9256]                                              | 3.120383243 | 4.30692316  |
| DOK4     | docking protein 4 [Source:HGNC Symbol;Acc:19868]                                                                      | 3.120212547 | 3.802146927 |
| GPR133   | G protein-coupled receptor 133 [Source:HGNC Symbol;Acc:19893]                                                         | 3.915849876 | 3.118377322 |
| SFXN3    | sideroflexin 3 [Source:HGNC Symbol;Acc:16087]                                                                         | 3.18152232  | 3.114776229 |
| SH3RF2   | SH3 domain containing ring finger 2 [Source:HGNC Symbol;Acc:26299]                                                    | 3.266958144 | 3.114454163 |
| SH3BP5   | SH3-domain binding protein 5 (BTK-associated) [Source:HGNC Symbol;Acc:10827]                                          | 3.112385136 | 3.674882864 |
| MGST2    | microsomal glutathione S-transferase 2 [Source:HGNC Symbol;Acc:7063]                                                  | 3.110676994 | 3.479659201 |
| C9orf150 | leucine rich adaptor protein 1-like [Source:HGNC Symbol;Acc:31452]                                                    | 3.739417542 | 3.109582336 |
| PDGFD    | platelet derived growth factor D [Source:HGNC Symbol;Acc:30620]                                                       | 3.9466157   | 3.109295143 |
| F2RL2    | coagulation factor II (thrombin) receptor-like 2 [Source:HGNC Symbol;Acc:3539]                                        | 3.218976947 | 3.106845011 |
| DKK1     | dickkopf 1 homolog (Xenopus laevis) [Source:HGNC Symbol;Acc:2891]                                                     | 3.364351143 | 3.100771984 |
| CAPN3    | calpain 3, (p94) [Source:HGNC Symbol;Acc:1480]                                                                        | 3.291303321 | 3.099764564 |
| MSRB3    | methionine sulfoxide reductase B3 [Source:HGNC Symbol;Acc:27375]                                                      | 5.938221702 | 3.081893572 |
| KCNE4    | potassium voltage-gated channel, Isk-related family, member 4 [Source:HGNC Symbol;Acc:6244]                           | 3.084766872 | 3.084877408 |
| RRAD     | Ras-related associated with diabetes [Source:HGNC Symbol;Acc:10446]                                                   | 3.342462229 | 3.080564297 |
| SGMS2    | sphingomyelin synthase 2 [Source:HGNC Symbol;Acc:28395]                                                               | 4.094407737 | 3.072752539 |
| TCAP     | titin-cap (telethonin) [Source:HGNC Symbol;Acc:11610]                                                                 | 3.243732704 | 3.071411858 |
| KRT17    | keratin 17 [Source:HGNC Symbol;Acc:6427]                                                                              | 3.071094631 | 3.289504029 |
| DKK2     | dickkopf 2 homolog (Xenopus laevis) [Source:HGNC Symbol;Acc:2892]                                                     | 3.882349307 | 3.070130151 |
| GP1BB    | glycoprotein Ib (platelet), beta polypeptide [Source:HGNC Symbol;Acc:4440]                                            | 3.40336298  | 3.05971128  |
| GPR155   | G protein-coupled receptor 155 [Source:HGNC Symbol;Acc:22951]                                                         | 4.091892409 | 3.057004385 |
| ANTXR1   | anthrax toxin receptor 1 [Source:HGNC Symbol;Acc:21014]                                                               | 3.055543498 | 3.218084486 |
| SMAD6    | SMAD family member 6 [Source:HGNC Symbol;Acc:6772]                                                                    | 3.727929743 | 3.052503683 |
| SH3PX2A  | SH3 and PX domains 2A [Source:HGNC Symbol;Acc:23664]                                                                  | 3.084525918 | 3.039930816 |
| CXCL12   | chemokine (C-X-C motif) ligand 12 [Source:HGNC Symbol;Acc:10672]                                                      | 3.023770547 | 5.76792036  |
| RGS3     | regulator of G-protein signaling 3 [Source:HGNC Symbol;Acc:9999]                                                      | 3.083525112 | 3.021870631 |
| MIR21    | microRNA 21 [Source:HGNC Symbol;Acc:31586]                                                                            | 4.435860068 | 3.013103472 |
| SVIL     | supervillin [Source:HGNC Symbol;Acc:11480]                                                                            | 4.333390869 | 3.011515526 |
| SIRPA    | signal-regulatory protein alpha [Source:HGNC Symbol;Acc:9662]                                                         | 3.37222921  | 3.010042655 |
| MAN1C1   | mannosidase, alpha, class 1C, member 1 [Source:HGNC Symbol;Acc:19080]                                                 | 3.324044593 | 2.996336796 |
| SMAD7    | SMAD family member 7 [Source:HGNC Symbol;Acc:6773]                                                                    | 3.50744217  | 2.993059731 |
| MRAS     | muscle RAS oncogene homolog [Source:HGNC Symbol;Acc:7227]                                                             | 2.983110395 | 3.388090149 |
| CFI      | complement factor I [Source:HGNC Symbol;Acc:5394]                                                                     | 4.085440187 | 2.982462024 |
| ME1      | malic enzyme 1, NADP(+)-dependent, cytosolic [Source:HGNC Symbol;Acc:6983]                                            | 2.9812966   | 3.910515021 |
| C6orf142 | muscular LMNA-interacting protein [Source:HGNC Symbol;Acc:21355]                                                      | 3.737105435 | 2.979728594 |
| GRIA3    | glutamate receptor, ionotropic, AMPA 3 [Source:HGNC Symbol;Acc:4573]                                                  | 3.464327022 | 2.978299924 |
| SLC40A1  | solute carrier family 40 (iron-regulated transporter), member 1 [Source:HGNC Symbol;Acc:10909]                        | 5.182081766 | 2.976341607 |
| IGF2     | insulin-like growth factor 2 (somatomedin A) [Source:HGNC Symbol;Acc:5466]                                            | 6.350185867 | 2.975622131 |
| ANO4     | anoctamin 4 [Source:HGNC Symbol;Acc:23837]                                                                            | 2.965610789 | 3.676386918 |
| CAMK2D   | calcium/calmodulin-dependent protein kinase II delta [Source:HGNC Symbol;Acc:1462]                                    | 4.041471205 | 2.95892519  |
| GC       | group-specific component (vitamin D binding protein) [Source:HGNC Symbol;Acc:4187]                                    | 2.945318129 | 3.25081894  |
| B3GALT2  | UDP-Gal:betaGlcNAc beta 1,3-galactosyltransferase, polypeptide 2 [Source:HGNC Symbol;Acc:917]                         | 5.486363215 | 2.937385398 |
| AHNAK    | AHNAK nucleoprotein [Source:HGNC Symbol;Acc:347]                                                                      | 2.937322613 | 3.28981027  |
| IER3     | immediate early response 3 [Source:HGNC Symbol;Acc:5392]                                                              | 2.933350649 | 4.68671059  |
| KRT8     | keratin 8 [Source:HGNC Symbol;Acc:6446]                                                                               | 2.930783835 | 5.057879375 |
| CLSTN2   | calsynenin 2 [Source:HGNC Symbol;Acc:17448]                                                                           | 3.522039267 | 2.929115518 |
| LTBP1    | latent transforming growth factor beta binding protein 1 [Source:HGNC Symbol;Acc:6714]                                | 3.097008108 | 2.919967211 |
| LRCH1    | leucine-rich repeats and calponin homology (CH) domain containing 1 [Source:HGNC Symbol;Acc:20309]                    | 3.143210628 | 2.917734838 |
| ST3GAL1  | ST3 beta-galactoside alpha-2,3-sialyltransferase 1 [Source:HGNC Symbol;Acc:10862]                                     | 3.295053489 | 2.91396703  |
| RAC1     | ras-related C3 botulinum toxin substrate 1 (rho family, small GTP binding protein Rac1) [Source:HGNC Symbol;Acc:9801] | 2.910217072 | 3.406450678 |
| MMP10    | matrix metalloproteinase 10 (stromelysin 2) [Source:HGNC Symbol;Acc:7156]                                             | 2.909270776 | 2.965717393 |
| TGFB11   | transforming growth factor beta 1 induced transcript 1 [Source:HGNC Symbol;Acc:11767]                                 | 3.506700531 | 2.895517885 |
| CAP2     | CAP, adenylate cyclase-associated protein, 2 (yeast) [Source:HGNC Symbol;Acc:20039]                                   | 3.474233449 | 2.893925451 |
| TLL1     | tolloid-like 1 [Source:HGNC Symbol;Acc:11843]                                                                         | 3.404711926 | 2.891127394 |
| C11orf21 | chromosome 11 open reading frame 21 [Source:HGNC Symbol;Acc:13231]                                                    | 2.888256344 | 3.106834967 |
| ASAH1    | N-acylsphingosine amidohydrolase (acid ceramidase) 1 [Source:HGNC Symbol;Acc:735]                                     | 3.161971033 | 2.886899014 |
| SRPX     | sushi-repeat containing protein, X-linked [Source:HGNC Symbol;Acc:11309]                                              | 2.884197158 | 3.459290335 |
| FRY      | furry homolog (Drosophila) [Source:HGNC Symbol;Acc:20367]                                                             | 3.23189812  | 2.868701832 |
| MMP23A   | matrix metalloproteinase 23A (pseudogene) [Source:HGNC Symbol;Acc:7170]                                               | 2.864373922 | 3.207075999 |
| TSPAN9   | tetraspanin 9 [Source:HGNC Symbol;Acc:21640]                                                                          | 2.854710319 | 3.440669168 |
| SV2C     | synaptic vesicle glycoprotein 2C [Source:HGNC Symbol;Acc:30670]                                                       | 2.953991902 | 2.854073427 |
| C7orf41  | chromosome 7 open reading frame 41 [Source:HGNC Symbol;Acc:25457]                                                     | 2.852747202 | 2.865183937 |
| WNT5B    | wingless-type MMTV integration site family, member 5B [Source:HGNC Symbol;Acc:16265]                                  | 4.357485501 | 2.850073122 |

|            |                                                                                                                        |             |             |
|------------|------------------------------------------------------------------------------------------------------------------------|-------------|-------------|
| C4orf26    | chromosome 4 open reading frame 26 [Source:HGNC Symbol;Acc:26300]                                                      | 2.838992113 | 2.843571499 |
| COL4A1     | collagen, type IV, alpha 1 [Source:HGNC Symbol;Acc:2202]                                                               | 2.839182408 | 2.83725054  |
| DYSF       | dysferlin, limb girdle muscular dystrophy 2B (autosomal recessive) [Source:HGNC Symbol;Acc:3097]                       | 2.836661947 | 3.498873776 |
| GPR158     | G protein-coupled receptor 158 [Source:HGNC Symbol;Acc:23689]                                                          | 2.831602914 | 3.135468175 |
| FAM40B     | family with sequence similarity 40, member B [Source:HGNC Symbol;Acc:22209]                                            | 3.524875809 | 2.830397097 |
| TPM3       | tropomyosin 3 [Source:HGNC Symbol;Acc:12012]                                                                           | 3.19206622  | 2.830037261 |
| TIPARP     | TCDD-inducible poly(ADP-ribose) polymerase [Source:HGNC Symbol;Acc:23696]                                              | 3.073091106 | 2.824921162 |
| ATP2A2     | ATPase, Ca++ transporting, cardiac muscle, slow twitch 2 [Source:HGNC Symbol;Acc:812]                                  | 2.824051945 | 2.924371694 |
| MMP11      | matrix metalloproteinase 11 (stromelysin 3) [Source:HGNC Symbol;Acc:7157]                                              | 2.81412193  | 2.826774269 |
| FITM1      | fat storage-inducing transmembrane protein 1 [Source:HGNC Symbol;Acc:33714]                                            | 2.878635414 | 2.808146673 |
| SLIT3      | slit homolog 3 (Drosophila) [Source:HGNC Symbol;Acc:11087]                                                             | 5.738291503 | 2.805793018 |
| DNAJC15    | DnaJ (Hsp40) homolog, subfamily C, member 15 [Source:HGNC Symbol;Acc:20325]                                            | 2.80535935  | 4.497887154 |
| MTUS2      | microtubule associated tumor suppressor candidate 2 [Source:HGNC Symbol;Acc:20595]                                     | 3.472164656 | 2.805041625 |
| ITGA1      | integrin, alpha 1 [Source:HGNC Symbol;Acc:6134]                                                                        | 2.801877915 | 3.114270155 |
| SLC46A3    | solute carrier family 46, member 3 [Source:HGNC Symbol;Acc:27501]                                                      | 3.31789386  | 2.800809432 |
| PCGF5      | polycomb group ring finger 5 [Source:HGNC Symbol;Acc:28264]                                                            | 3.859591049 | 2.79899488  |
| ZCCHC24    | zinc finger, CCHC domain containing 24 [Source:HGNC Symbol;Acc:26911]                                                  | 2.7971073   | 3.196160016 |
| CREM       | cAMP responsive element modulator [Source:HGNC Symbol;Acc:2352]                                                        | 2.796993465 | 2.919244591 |
| KRT7       | keratin 7 [Source:HGNC Symbol;Acc:6445]                                                                                | 2.794013561 | 5.026917298 |
| DNAJC6     | DnaJ (Hsp40) homolog, subfamily C, member 6 [Source:HGNC Symbol;Acc:15469]                                             | 3.002105339 | 2.786817047 |
| ANXA3      | annexin A3 [Source:HGNC Symbol;Acc:541]                                                                                | 2.769837017 | 7.719927506 |
| FLI1       | Friend leukemia virus integration 1 [Source:HGNC Symbol;Acc:3749]                                                      | 2.796466076 | 2.766734396 |
| CNTN1      | contactin 1 [Source:HGNC Symbol;Acc:2171]                                                                              | 2.766411957 | 4.891983578 |
| KCNE1      | potassium voltage-gated channel, Isk-related family, member 1 [Source:HGNC Symbol;Acc:6240]                            | 3.192531136 | 2.76486461  |
| ADRB2      | adrenoceptor beta 2, surface [Source:HGNC Symbol;Acc:286]                                                              | 2.762816286 | 2.90277449  |
| PRKAG2     | protein kinase, AMP-activated, gamma 2 non-catalytic subunit [Source:HGNC Symbol;Acc:9386]                             | 3.064844421 | 2.761559696 |
| ADAMTSL1   | ADAMTS-like 1 [Source:HGNC Symbol;Acc:14632]                                                                           | 2.761485688 | 2.807900935 |
| ANXA1      | annexin A1 [Source:HGNC Symbol;Acc:533]                                                                                | 7.170799465 | 2.752470172 |
| LPCAT2     | lysophosphatidylcholine acyltransferase 2 [Source:HGNC Symbol;Acc:26032]                                               | 3.233037157 | 2.751663674 |
| NT5E       | 5'-nucleotidase, ecto (CD73) [Source:HGNC Symbol;Acc:8021]                                                             | 2.75005365  | 3.74847992  |
| EMP3       | epithelial membrane protein 3 [Source:HGNC Symbol;Acc:3335]                                                            | 2.747748305 | 2.966535431 |
| SLC16A12   | solute carrier family 16, member 12 (monocarboxylic acid transporter 12) [Source:HGNC Symbol;Acc:23094]                | 2.747320899 | 5.705729034 |
| HECW2      | HECT, C2 and WW domain containing E3 ubiquitin protein ligase 2 [Source:HGNC Symbol;Acc:29853]                         | 3.397341109 | 2.738483416 |
| ETV5       | ets variant 5 [Source:HGNC Symbol;Acc:3494]                                                                            | 2.737512807 | 4.596342471 |
| C5orf23    | natriuretic peptide receptor C/guanylate cyclase C (atrionatriuretic peptide receptor C) [Source:HGNC Symbol;Acc:7945] | 3.193258673 | 2.733957378 |
| NOTCH2     | notch 2 [Source:HGNC Symbol;Acc:7882]                                                                                  | 3.141489505 | 2.732178315 |
| GBE1       | glucan (1,4-alpha-), branching enzyme 1 [Source:HGNC Symbol;Acc:4180]                                                  | 2.731734031 | 2.88144412  |
| PTP4A3     | protein tyrosine phosphatase type IVA, member 3 [Source:HGNC Symbol;Acc:9636]                                          | 2.721212174 | 3.865885502 |
| NFIC       | nuclear factor I/C (CCAAT-binding transcription factor) [Source:HGNC Symbol;Acc:7786]                                  | 2.718799073 | 2.846270479 |
| LTBP3      | latent transforming growth factor beta binding protein 3 [Source:HGNC Symbol;Acc:6716]                                 | 2.718684022 | 2.91958739  |
| HIST2H2AA3 | histone cluster 2, H2aa3 [Source:HGNC Symbol;Acc:4736]                                                                 | 3.927734856 | 2.71043284  |
| TNNI3      | troponin I type 3 (cardiac) [Source:HGNC Symbol;Acc:11947]                                                             | 2.705739814 | 5.661829518 |
| NIPAL3     | NIPA-like domain containing 3 [Source:HGNC Symbol;Acc:25233]                                                           | 2.704810791 | 3.897408884 |
| CEBPD      | CCAAT/enhancer binding protein (C/EBP), delta [Source:HGNC Symbol;Acc:1835]                                            | 3.64376844  | 2.697669305 |
| ALPK3      | alpha-kinase 3 [Source:HGNC Symbol;Acc:17574]                                                                          | 2.697126068 | 5.754653531 |
| FIBIN      | fin bud initiation factor homolog (zebrafish) [Source:HGNC Symbol;Acc:33747]                                           | 2.697069187 | 2.803376777 |
| KIFAP3     | kinesin-associated protein 3 [Source:HGNC Symbol;Acc:17060]                                                            | 5.123029963 | 2.693487243 |
| LIP4       | CAP-GLY domain containing linker protein family, member 4 [Source:HGNC Symbol;Acc:26108]                               | 5.394633482 | 2.682009431 |
| FOSL2      | FOS-like antigen 2 [Source:HGNC Symbol;Acc:3798]                                                                       | 4.423555396 | 2.681173545 |
| LUM        | lumican [Source:HGNC Symbol;Acc:6724]                                                                                  | 8.733512506 | 2.679319828 |
| AFAP1L1    | actin filament associated protein 1-like 1 [Source:HGNC Symbol;Acc:26714]                                              | 2.673182411 | 3.725859388 |
| KBTBD10    | kelch repeat and BTB (POZ) domain containing 10 [Source:HGNC Symbol;Acc:16905]                                         | 2.910404942 | 2.670527553 |
| ITIH2      | inter-alpha-trypsin inhibitor heavy chain 2 [Source:HGNC Symbol;Acc:6167]                                              | 3.456291265 | 2.659130726 |
| NTF4       | neurotrophin 4 [Source:HGNC Symbol;Acc:8024]                                                                           | 2.656981118 | 4.251183748 |
| DUSP5      | dual specificity phosphatase 5 [Source:HGNC Symbol;Acc:3071]                                                           | 2.654799588 | 3.615327677 |
| SPINK1     | serine peptidase inhibitor, Kazal type 1 [Source:HGNC Symbol;Acc:11244]                                                | 2.654537311 | 4.62034007  |
| FAM198B    | family with sequence similarity 198, member B [Source:HGNC Symbol;Acc:25312]                                           | 8.443275189 | 2.653490933 |
| LOC645954  | supervillin pseudogene 1 [Source:HGNC Symbol;Acc:44959]                                                                | 3.866087216 | 2.648025391 |
| C1orf198   | chromosome 1 open reading frame 198 [Source:HGNC Symbol;Acc:25900]                                                     | 3.40434572  | 2.646626383 |
| PYGM       | phosphorylase, glycogen, muscle [Source:HGNC Symbol;Acc:9726]                                                          | 2.644214198 | 4.018465006 |
| ARHGDI3    | Rho GDP dissociation inhibitor (GDI) beta [Source:HGNC Symbol;Acc:679]                                                 | 2.957175439 | 2.643826097 |
| HMGCLL1    | 3-hydroxymethyl-3-methylglutaryl-CoA lyase-like 1 [Source:HGNC Symbol;Acc:21359]                                       | 4.458553728 | 2.642193458 |
| AMY1A      | amylase, alpha 1B (salivary) [Source:HGNC Symbol;Acc:475]                                                              | 2.637543379 | 2.639898907 |
| LAMA2      | laminin, alpha 2 [Source:HGNC Symbol;Acc:6482]                                                                         | 4.1250157   | 2.633525822 |
| HEG1       | HEG homolog 1 (zebrafish) [Source:HGNC Symbol;Acc:29227]                                                               | 3.525693555 | 2.632212016 |
| EMP2       | epithelial membrane protein 2 [Source:HGNC Symbol;Acc:3334]                                                            | 2.72255821  | 2.632176827 |
| TMEM71     | transmembrane protein 71 [Source:HGNC Symbol;Acc:26572]                                                                | 3.095803825 | 2.631314923 |
| MEF2A      | myocyte enhancer factor 2A [Source:HGNC Symbol;Acc:6993]                                                               | 3.318135518 | 2.630792529 |
| KCNMA1     | potassium large conductance calcium-activated channel, subfamily M, alpha member 1 [Source:HGNC Symbol;Acc:6284]       | 2.630498738 | 3.963736336 |
| BHLHE40    | basic helix-loop-helix family, member e40 [Source:HGNC Symbol;Acc:1046]                                                | 2.618728344 | 2.858362529 |
| PLAT       | plasminogen activator, tissue [Source:HGNC Symbol;Acc:9051]                                                            | 3.061323078 | 2.615331978 |
| EEF1A2     | eukaryotic translation elongation factor 1 alpha 2 [Source:HGNC Symbol;Acc:3192]                                       | 2.612651486 | 3.017534267 |
| RDH10      | retinol dehydrogenase 10 (all-trans) [Source:HGNC Symbol;Acc:19975]                                                    | 3.689321996 | 2.607326679 |
| SPARC      | secreted protein, acidic, cysteine-rich (osteonectin) [Source:HGNC Symbol;Acc:11219]                                   | 2.665645879 | 2.602676313 |

|           |                                                                                                                                         |             |             |
|-----------|-----------------------------------------------------------------------------------------------------------------------------------------|-------------|-------------|
| COL5A2    | collagen, type V, alpha 2 [Source:HGNC Symbol;Acc:2210]                                                                                 | 3.378509016 | 2.599429787 |
| VTN       | vitronectin [Source:HGNC Symbol;Acc:12724]                                                                                              | 2.701506785 | 2.599024567 |
| GABRE     | gamma-aminobutyric acid (GABA) A receptor, epsilon [Source:HGNC Symbol;Acc:4085]                                                        | 2.593954096 | 3.086928895 |
| TNC       | tenascin C [Source:HGNC Symbol;Acc:5318]                                                                                                | 4.219436562 | 2.590306334 |
| BMP2      | bone morphogenetic protein 2 [Source:HGNC Symbol;Acc:1069]                                                                              | 2.587286651 | 4.830238418 |
| SHB       | Src homology 2 domain containing adaptor protein B [Source:HGNC Symbol;Acc:10838]                                                       | 2.585851373 | 3.51979674  |
| IDH3A     | isocitrate dehydrogenase 3 (NAD+) alpha [Source:HGNC Symbol;Acc:5384]                                                                   | 2.584052493 | 2.702302946 |
| PPAPDC1A  | phosphatidic acid phosphatase type 2 domain containing 1A [Source:HGNC Symbol;Acc:23531]                                                | 2.584200732 | 2.579158097 |
| NFIA      | nuclear factor I/A [Source:HGNC Symbol;Acc:7784]                                                                                        | 4.111276698 | 2.578995125 |
| HHATL     | hedgehog acyltransferase-like [Source:HGNC Symbol;Acc:13242]                                                                            | 2.573813156 | 2.605819453 |
| PPFIA4    | protein tyrosine phosphatase, receptor type, f polypeptide (PTPRF), interacting protein (liprin), alpha 4 [Source:HGNC Symbol;Acc:9248] | 2.573045521 | 4.07873122  |
| CACNB1    | calcium channel, voltage-dependent, beta 1 subunit [Source:HGNC Symbol;Acc:1401]                                                        | 2.569133945 | 2.797106375 |
| EPHB3     | EPH receptor B3 [Source:HGNC Symbol;Acc:3394]                                                                                           | 3.764781988 | 2.568780365 |
| TNMD      | tenomodulin [Source:HGNC Symbol;Acc:17757]                                                                                              | 2.567325173 | 4.014867628 |
| RARB      | retinoic acid receptor, beta [Source:HGNC Symbol;Acc:9865]                                                                              | 4.796149928 | 2.566751556 |
| LOC728264 | MIR143 host gene [Source:HGNC Symbol;Acc:42872]                                                                                         | 2.574700118 | 2.566682262 |
| SMTNL2    | smoothelin-like 2 [Source:HGNC Symbol;Acc:24764]                                                                                        | 2.562785291 | 3.221129459 |
| CRIM1     | Processed cysteine-rich motor neuron 1 protein [Source:UniProtKB/TrEMBL;Acc:H7C120]                                                     | 2.562661178 | 2.575094224 |
| DGKB      | diacylglycerol kinase, beta 90kDa [Source:HGNC Symbol;Acc:2850]                                                                         | 2.739386968 | 2.560779267 |
| PLD1      | phospholipase D1, phosphatidylcholine-specific [Source:HGNC Symbol;Acc:9067]                                                            | 2.648152436 | 2.554023921 |
| MYOF      | myoferlin [Source:HGNC Symbol;Acc:3656]                                                                                                 | 4.66984565  | 2.551160105 |
| RAB3IP    | RAB3A interacting protein (rabin3) [Source:HGNC Symbol;Acc:16508]                                                                       | 3.44082479  | 2.549437891 |
| TNS1      | tensin 1 [Source:HGNC Symbol;Acc:11973]                                                                                                 | 2.641474521 | 2.546919208 |
| TNFRSF11B | tumor necrosis factor receptor superfamily, member 11b [Source:HGNC Symbol;Acc:11909]                                                   | 2.546140502 | 2.812419299 |
| PLXNA4    | plexin A4 [Source:HGNC Symbol;Acc:9102]                                                                                                 | 3.430911981 | 2.540565806 |
| AREG      | amphiregulin B [Source:HGNC Symbol;Acc:34509]                                                                                           | 2.602307604 | 2.537663019 |
| DDR2      | discoidin domain receptor tyrosine kinase 2 [Source:HGNC Symbol;Acc:2731]                                                               | 3.112312694 | 2.53759852  |
| MBNL2     | muscleblind-like splicing regulator 2 [Source:HGNC Symbol;Acc:16746]                                                                    | 4.618815759 | 2.537115197 |
| CLDN1     | claudin 1 [Source:HGNC Symbol;Acc:2032]                                                                                                 | 2.530102806 | 3.133223146 |
| SERPINB7  | serpin peptidase inhibitor, clade B (ovalbumin), member 7 [Source:HGNC Symbol;Acc:13902]                                                | 2.779117293 | 2.522815521 |
| LRRC49    | leucine rich repeat containing 49 [Source:HGNC Symbol;Acc:25965]                                                                        | 3.514996157 | 2.521342547 |
| SIPA1L2   | signal-induced proliferation-associated 1 like 2 [Source:HGNC Symbol;Acc:23800]                                                         | 5.326517398 | 2.518694226 |
| GPR22     | G protein-coupled receptor 22 [Source:HGNC Symbol;Acc:4477]                                                                             | 2.877277776 | 2.518031814 |
| FBN1      | fibrillin 1 [Source:HGNC Symbol;Acc:3603]                                                                                               | 3.777926632 | 2.517590536 |
| LTBP2     | latent transforming growth factor beta binding protein 2 [Source:HGNC Symbol;Acc:6715]                                                  | 2.760352643 | 2.504542555 |
| WLS       | wntless homolog (Drosophila) [Source:HGNC Symbol;Acc:30238]                                                                             | 6.596645997 | 2.50304107  |
| NAV1      | neuron navigator 1 [Source:HGNC Symbol;Acc:15989]                                                                                       | 3.008586839 | 2.497332693 |
| KIFC3     | kinesin family member C3 [Source:HGNC Symbol;Acc:6326]                                                                                  | 3.039001045 | 2.494397493 |
| PINK1     | PTEN induced putative kinase 1 [Source:HGNC Symbol;Acc:14581]                                                                           | 2.491679005 | 2.730420915 |
| LRRN4     | leucine rich repeat neuronal 4 [Source:HGNC Symbol;Acc:16208]                                                                           | 2.491450066 | 2.533850351 |
| FHOD3     | formin homology 2 domain containing 3 [Source:HGNC Symbol;Acc:26178]                                                                    | 4.005283351 | 2.488221595 |
| REEP5     | receptor accessory protein 5 [Source:HGNC Symbol;Acc:30077]                                                                             | 2.487355532 | 2.989278033 |
| PIK3AP1   | phosphoinositide-3-kinase adaptor protein 1 [Source:HGNC Symbol;Acc:30034]                                                              | 2.486972061 | 2.718404066 |
| DNAJB4    | DnaJ (Hsp40) homolog, subfamily B, member 4 [Source:HGNC Symbol;Acc:14886]                                                              | 2.507697012 | 2.484844348 |
| RAI2      | retinoic acid induced 2 [Source:HGNC Symbol;Acc:9835]                                                                                   | 2.479067265 | 2.527148915 |
| ANKRD29   | ankyrin repeat domain 29 [Source:HGNC Symbol;Acc:27110]                                                                                 | 2.473043879 | 2.515934989 |
| PCDH10    | protocadherin 10 [Source:HGNC Symbol;Acc:13404]                                                                                         | 2.472472085 | 3.436129838 |
| S1PR1     | sphingosine-1-phosphate receptor 1 [Source:HGNC Symbol;Acc:3165]                                                                        | 5.443617927 | 2.472169138 |
| CRIP2     | cysteine-rich protein 2 [Source:HGNC Symbol;Acc:2361]                                                                                   | 4.575460604 | 2.470417571 |
| C12orf75  | chromosome 12 open reading frame 75 [Source:HGNC Symbol;Acc:35164]                                                                      | 2.46501322  | 3.115888731 |
| FSD2      | fibronectin type III and SPRY domain containing 2 [Source:HGNC Symbol;Acc:18024]                                                        | 2.773458454 | 2.460849195 |
| MYH11     | myosin, heavy chain 11, smooth muscle [Source:HGNC Symbol;Acc:7569]                                                                     | 2.449936615 | 2.740463304 |
| KCNH2     | potassium voltage-gated channel, subfamily H (eag-related), member 2 [Source:HGNC Symbol;Acc:6251]                                      | 2.949892734 | 2.446804348 |
| C4orf22   | chromosome 4 open reading frame 22 [Source:HGNC Symbol;Acc:28554]                                                                       | 2.699260778 | 2.446799361 |
| PKIG      | protein kinase (cAMP-dependent, catalytic) inhibitor gamma [Source:HGNC Symbol;Acc:9019]                                                | 2.527671586 | 2.446752788 |
| RUNX1     | runt-related transcription factor 1 [Source:HGNC Symbol;Acc:10471]                                                                      | 3.448153228 | 2.446637046 |
| AMY2B     | amylase, alpha 2B (pancreatic) [Source:HGNC Symbol;Acc:478]                                                                             | 2.44565044  | 2.521556014 |
| KLHL21    | kelch-like 21 (Drosophila) [Source:HGNC Symbol;Acc:29041]                                                                               | 2.443354616 | 2.446434123 |
| PPM1K     | protein phosphatase, Mg2+/Mn2+ dependent, 1K [Source:HGNC Symbol;Acc:25415]                                                             | 2.588844359 | 2.441710627 |
| NRP1      | neuroligin 1 [Source:HGNC Symbol;Acc:8004]                                                                                              | 2.69760084  | 2.43766035  |
| RGN       | regucalcin (senescence marker protein-30) [Source:HGNC Symbol;Acc:9989]                                                                 | 2.43764957  | 2.979863598 |
| RNF217    | ring finger protein 217 [Source:HGNC Symbol;Acc:21487]                                                                                  | 2.803458776 | 2.434558966 |
| LRRC32    | leucine rich repeat containing 32 [Source:HGNC Symbol;Acc:4161]                                                                         | 2.432995651 | 2.898733097 |
| ITGA3     | integrin, alpha 3 (antigen CD49C, alpha 3 subunit of VLA-3 receptor) [Source:HGNC Symbol;Acc:6139]                                      | 2.432596736 | 3.447559752 |
| MFAP4     | microfibrillar-associated protein 4 [Source:HGNC Symbol;Acc:7035]                                                                       | 2.432324547 | 2.494674818 |
| CPEB4     | cytoplasmic polyadenylation element binding protein 4 [Source:HGNC Symbol;Acc:21747]                                                    | 3.562931182 | 2.431663897 |
| CYB5R1    | cytochrome b5 reductase 1 [Source:HGNC Symbol;Acc:13397]                                                                                | 2.894761764 | 2.431505046 |
| SUCNR1    | succinate receptor 1 [Source:HGNC Symbol;Acc:4542]                                                                                      | 2.426428834 | 2.527418895 |
| C3orf45   | chromosome 3 open reading frame 45 [Source:HGNC Symbol;Acc:26781]                                                                       | 2.426051695 | 2.746004221 |
| MEF2C     | myocyte enhancer factor 2A [Source:HGNC Symbol;Acc:6993]                                                                                | 4.873186024 | 2.425738741 |
| EPHA2     | EPH receptor A2 [Source:HGNC Symbol;Acc:3386]                                                                                           | 2.688396111 | 2.422263399 |
| FXD1      | FXD domain containing ion transport regulator 1 [Source:HGNC Symbol;Acc:4025]                                                           | 2.419993843 | 3.225921016 |
| CYP24A1   | cytochrome P450, family 24, subfamily A, polypeptide 1 [Source:HGNC Symbol;Acc:2602]                                                    | 2.419123217 | 2.757398216 |
| AGTR1     | angiotensin II receptor, type 1 [Source:HGNC Symbol;Acc:336]                                                                            | 2.653599845 | 2.412591053 |
| NRK       | Nik related kinase [Source:HGNC Symbol;Acc:25391]                                                                                       | 2.403506377 | 2.428352806 |

|           |                                                                                                                                                                            |             |             |
|-----------|----------------------------------------------------------------------------------------------------------------------------------------------------------------------------|-------------|-------------|
| LAMA4     | laminin, alpha 4 [Source:HGNC Symbol;Acc:6484]                                                                                                                             | 3.746126123 | 2.401208596 |
| OBSCN     | obscurin, cytoskeletal calmodulin and titin-interacting RhoGEF [Source:HGNC Symbol;Acc:15719]                                                                              | 2.598541342 | 2.401037422 |
| GSN       | gelsolin [Source:HGNC Symbol;Acc:4620]                                                                                                                                     | 2.399892711 | 3.618107353 |
| RGS4      | regulator of G-protein signaling 4 [Source:HGNC Symbol;Acc:10000]                                                                                                          | 4.096154983 | 2.398720288 |
| TPD52L1   | tumor protein D52-like 1 [Source:HGNC Symbol;Acc:12006]                                                                                                                    | 2.397345114 | 6.008245637 |
| PIK3IP1   | phosphoinositide-3-kinase interacting protein 1 [Source:HGNC Symbol;Acc:24942]                                                                                             | 2.624510026 | 2.394294113 |
| KCNMB1    | potassium large conductance calcium-activated channel, subfamily M, beta member 1 [Source:HGNC Symbol;Acc:6285]                                                            | 2.391409626 | 2.767254811 |
| SLC4A3    | solute carrier family 4, anion exchanger, member 3 [Source:HGNC Symbol;Acc:11029]                                                                                          | 2.48130215  | 2.38933331  |
| GJB2      | gap junction protein, beta 2, 26kDa [Source:HGNC Symbol;Acc:4284]                                                                                                          | 3.581366669 | 2.38918059  |
| HIST1H2BC | histone cluster 1, H2bc [Source:HGNC Symbol;Acc:4757]                                                                                                                      | 2.387947011 | 2.405709082 |
| COL16A1   | collagen, type XVI, alpha 1 [Source:HGNC Symbol;Acc:2193]                                                                                                                  | 2.386694542 | 2.733669244 |
| FILIP1L   | filamin A interacting protein 1-like [Source:HGNC Symbol;Acc:24589]                                                                                                        | 5.578265841 | 2.378232274 |
| ITGA9     | integrin, alpha 9 [Source:HGNC Symbol;Acc:6145]                                                                                                                            | 3.648124556 | 2.373465137 |
| DNAJB9    | DnaJ (Hsp40) homolog, subfamily B, member 9 [Source:HGNC Symbol;Acc:6968]                                                                                                  | 2.372232699 | 2.608504436 |
| CHPF      | chondroitin polymerizing factor [Source:HGNC Symbol;Acc:24291]                                                                                                             | 2.371691788 | 2.624657229 |
| KLF5      | Kruppel-like factor 5 (intestinal) [Source:HGNC Symbol;Acc:6349]                                                                                                           | 2.369880741 | 2.725423568 |
| HTRA1     | HtrA serine peptidase 1 [Source:HGNC Symbol;Acc:9476]                                                                                                                      | 4.13356547  | 2.366230258 |
| PLAC8     | placenta-specific 8 [Source:HGNC Symbol;Acc:19254]                                                                                                                         | 2.365435004 | 3.297954212 |
| NOTCH2NL  | notch 2 N-terminal like [Source:HGNC Symbol;Acc:31862]                                                                                                                     | 2.564634882 | 2.365392364 |
| SPTB      | spectrin, beta, erythrocytic [Source:HGNC Symbol;Acc:11274]                                                                                                                | 2.365841866 | 2.352369594 |
| TOM1L2    | target of myb1-like 2 (chicken) [Source:HGNC Symbol;Acc:11984]                                                                                                             | 4.122592757 | 2.347589042 |
| SLC47A1   | solute carrier family 47, member 1 [Source:HGNC Symbol;Acc:25588]                                                                                                          | 2.34630636  | 2.954455606 |
| RAPGEF2   | Rap guanine nucleotide exchange factor (GEF) 2 [Source:HGNC Symbol;Acc:16854]                                                                                              | 2.832073402 | 2.343758812 |
| SH3GL3    | SH3-domain GRB2-like 3 [Source:HGNC Symbol;Acc:10832]                                                                                                                      | 2.340150365 | 5.194960145 |
| DYNC11    | dynein, cytoplasmic 1, intermediate chain 1 [Source:HGNC Symbol;Acc:2963]                                                                                                  | 2.339263907 | 2.819607679 |
| BMP1      | bone morphogenetic protein 1 [Source:HGNC Symbol;Acc:1067]                                                                                                                 | 3.014227605 | 2.337648181 |
| RCAN1     | regulator of calcineurin 1 [Source:HGNC Symbol;Acc:3040]                                                                                                                   | 3.840867349 | 2.335225437 |
| IL11RA    | interleukin 11 receptor, alpha [Source:HGNC Symbol;Acc:5967]                                                                                                               | 2.961026924 | 2.334197306 |
| ESRRG     | estrogen-related receptor gamma [Source:HGNC Symbol;Acc:3474]                                                                                                              | 3.481058905 | 2.333943976 |
| FNDC3B    | fibronectin type III domain containing 3B [Source:HGNC Symbol;Acc:24670]                                                                                                   | 2.428960111 | 2.330817762 |
| GABRB2    | gamma-aminobutyric acid (GABA) A receptor, beta 2 [Source:HGNC Symbol;Acc:4082]                                                                                            | 2.330433789 | 2.496642512 |
| MYO18A    | myosin XVIIIa [Source:HGNC Symbol;Acc:31104]                                                                                                                               | 2.481218089 | 2.330270541 |
| CAMK2B    | calcium/calmodulin-dependent protein kinase II beta [Source:HGNC Symbol;Acc:1461]                                                                                          | 2.599947171 | 2.327674682 |
| ALAS2     | aminolevulinic acid, delta-, synthase 2 [Source:HGNC Symbol;Acc:397]                                                                                                       | 2.364166665 | 2.321688083 |
| ADORA1    | adenosine A1 receptor [Source:HGNC Symbol;Acc:262]                                                                                                                         | 2.320413999 | 2.85633214  |
| ST3GAL6   | ST3 beta-galactoside alpha-2,3-sialyltransferase 6 [Source:HGNC Symbol;Acc:18080]                                                                                          | 2.317131238 | 3.313021541 |
| NIPAL2    | NIPA-like domain containing 2 [Source:HGNC Symbol;Acc:25854]                                                                                                               | 2.315313141 | 3.081663593 |
| MICALCL   | MICAL C-terminal like [Source:HGNC Symbol;Acc:25933]                                                                                                                       | 2.314163621 | 2.314131279 |
| NPY6R     | neuropeptide Y receptor Y6 (pseudogene) [Source:HGNC Symbol;Acc:7959]                                                                                                      | 2.533402031 | 2.303925424 |
| DPF3      | D4, zinc and double PHD fingers, family 3 [Source:HGNC Symbol;Acc:17427]                                                                                                   | 2.330159124 | 2.297639325 |
| GADD45A   | growth arrest and DNA-damage-inducible, alpha [Source:HGNC Symbol;Acc:4095]                                                                                                | 2.629543878 | 2.293602718 |
| ISL1      | ISL LIM homeobox 1 [Source:HGNC Symbol;Acc:6132]                                                                                                                           | 3.566077192 | 2.292955142 |
| P4HA2     | prolyl 4-hydroxylase, alpha polypeptide II [Source:HGNC Symbol;Acc:8547]                                                                                                   | 2.2906579   | 3.382339652 |
| HOXC6     | homeobox C6 [Source:HGNC Symbol;Acc:5128]                                                                                                                                  | 2.298448122 | 2.289346408 |
| EDN3      | endothelin 3 [Source:HGNC Symbol;Acc:3178]                                                                                                                                 | 2.289270913 | 2.348828147 |
| HSBP1L1   | heat shock factor binding protein 1-like 1 [Source:HGNC Symbol;Acc:37243]                                                                                                  | 2.288523359 | 2.464323206 |
| ARHGAP1   | Rho GTPase activating protein 1 [Source:HGNC Symbol;Acc:673]                                                                                                               | 2.287345087 | 2.586896318 |
| OLFML1    | olfactomedin-like 1 [Source:HGNC Symbol;Acc:24473]                                                                                                                         | 2.733435173 | 2.284483834 |
| GATA3     | GATA binding protein 3 [Source:HGNC Symbol;Acc:4172]                                                                                                                       | 2.488925452 | 2.282521451 |
| TRIM54    | tripartite motif containing 54 [Source:HGNC Symbol;Acc:16008]                                                                                                              | 2.281271808 | 2.753741378 |
| FAM43A    | family with sequence similarity 43, member A [Source:HGNC Symbol;Acc:26888]                                                                                                | 2.278824178 | 4.117270172 |
| FAM114A1  | family with sequence similarity 114, member A1 [Source:HGNC Symbol;Acc:25087]                                                                                              | 2.277625262 | 2.316076259 |
| C12orf39  | chromosome 12 open reading frame 39 [Source:HGNC Symbol;Acc:28139]                                                                                                         | 2.275078059 | 2.823024651 |
| TNFRSF12A | tumor necrosis factor receptor superfamily, member 12A [Source:HGNC Symbol;Acc:18152]                                                                                      | 2.274744111 | 5.473612315 |
| PPAPDC3   | phosphatidic acid phosphatase type 2 domain containing 3 [Source:HGNC Symbol;Acc:28174]                                                                                    | 2.542112063 | 2.271834859 |
| HSPB1     | heat shock 27kDa protein 1 [Source:HGNC Symbol;Acc:5246]                                                                                                                   | 2.270522749 | 3.522735401 |
| P2RX1     | purinergic receptor P2X, ligand-gated ion channel, 1 [Source:HGNC Symbol;Acc:8533]                                                                                         | 2.267513004 | 2.269241321 |
| GPR87     | G protein-coupled receptor 87 [Source:HGNC Symbol;Acc:4538]                                                                                                                | 2.527927796 | 2.265925459 |
| ARHGAP24  | Rho GTPase activating protein 24 [Source:HGNC Symbol;Acc:25361]                                                                                                            | 3.020766115 | 2.263093956 |
| COL1A2    | collagen, type I, alpha 2 [Source:HGNC Symbol;Acc:2198]                                                                                                                    | 2.485941066 | 2.261964288 |
| ABLIM1    | actin binding LIM protein 1 [Source:HGNC Symbol;Acc:78]                                                                                                                    | 2.257898689 | 2.653017499 |
| WNT11     | wingless-type MMTV integration site family, member 11 [Source:HGNC Symbol;Acc:12776]                                                                                       | 2.257796944 | 2.32254015  |
| IL17B     | interleukin 17B [Source:HGNC Symbol;Acc:5982]                                                                                                                              | 2.257117338 | 2.445549648 |
| DES       | desmin [Source:HGNC Symbol;Acc:2770]                                                                                                                                       | 2.256009807 | 2.296948768 |
| SCP2      | sterol carrier protein 2 [Source:HGNC Symbol;Acc:10606]                                                                                                                    | 2.547423401 | 2.252429705 |
| CTSB      | cathepsin B [Source:HGNC Symbol;Acc:2527]                                                                                                                                  | 2.96519629  | 2.251876805 |
| SRL       | sarcalumenin [Source:HGNC Symbol;Acc:11295]                                                                                                                                | 2.48872319  | 2.251483202 |
| KRT18     | keratin 18 [Source:HGNC Symbol;Acc:6430]                                                                                                                                   | 2.251329725 | 5.206768591 |
| AEBP1     | AE binding protein 1 [Source:HGNC Symbol;Acc:303]                                                                                                                          | 2.241638587 | 2.596430693 |
| NTN4      | netrin 4 [Source:HGNC Symbol;Acc:13658]                                                                                                                                    | 4.847453201 | 2.239017681 |
| HAND1     | heart and neural crest derivatives expressed 1 [Source:HGNC Symbol;Acc:4807]                                                                                               | 2.268566842 | 2.238637115 |
| TINAGL1   | tubulointerstitial nephritis antigen-like 1 [Source:HGNC Symbol;Acc:19168]                                                                                                 | 2.237202304 | 2.664746116 |
| CHCHD10   | coiled-coil-helix-coiled-coil-helix domain containing 10 [Source:HGNC Symbol;Acc:15559]                                                                                    | 2.235225793 | 3.026886444 |
| SEMA5A    | sema domain, seven thrombospondin repeats (type 1 and type 1-like), transmembrane domain (TM) and short cytoplasmic domain, (semaphorin) 5A [Source:HGNC Symbol;Acc:10736] | 2.234909804 | 2.364783174 |
| RHOC      | ras homolog family member C [Source:HGNC Symbol;Acc:669]                                                                                                                   | 2.629222146 | 2.22772206  |



|            |                                                                                                                            |             |             |
|------------|----------------------------------------------------------------------------------------------------------------------------|-------------|-------------|
| SIK1       | salt-inducible kinase 1 [Source:HGNC Symbol;Acc:11142]                                                                     | 2.217898721 | 2.462259226 |
| LYPD6B     | LY6/PLAUR domain containing 6B [Source:HGNC Symbol;Acc:27018]                                                              | 2.215989968 | 3.835385502 |
| TFPI2      | tissue factor pathway inhibitor 2 [Source:HGNC Symbol;Acc:11761]                                                           | 2.472962293 | 2.21139321  |
| CPNE5      | copine V [Source:HGNC Symbol;Acc:2318]                                                                                     | 2.210552425 | 2.334982429 |
| FGF18      | fibroblast growth factor 18 [Source:HGNC Symbol;Acc:3674]                                                                  | 4.055660823 | 2.207151699 |
| BDNF       | brain-derived neurotrophic factor [Source:HGNC Symbol;Acc:1033]                                                            | 2.206718462 | 4.715377223 |
| TANC1      | tetratricopeptide repeat, ankyrin repeat and coiled-coil containing 1 [Source:HGNC Symbol;Acc:29364]                       | 3.119489226 | 2.204827172 |
| SGCA       | sarcoglycan, alpha (50kDa dystrophin-associated glycoprotein) [Source:HGNC Symbol;Acc:10805]                               | 2.271977237 | 2.204772184 |
| C13orf1    | chromosome 13 open reading frame 1 [Source:HGNC Symbol;Acc:14297]                                                          | 2.277928352 | 2.201910776 |
| CCDC69     | coiled-coil domain containing 69 [Source:HGNC Symbol;Acc:24487]                                                            | 2.200240456 | 3.724009502 |
| EFNA1      | ephrin-A1 [Source:HGNC Symbol;Acc:3221]                                                                                    | 2.329725627 | 2.199268696 |
| DACT3      | dapper, antagonist of beta-catenin, homolog 3 (Xenopus laevis) [Source:HGNC Symbol;Acc:30745]                              | 3.666765448 | 2.194030857 |
| FZD8       | frizzled family receptor 8 [Source:HGNC Symbol;Acc:4046]                                                                   | 2.187670726 | 3.019546569 |
| BTK        | Bruton agammaglobulinemia tyrosine kinase [Source:HGNC Symbol;Acc:1133]                                                    | 2.185687411 | 2.182037875 |
| KLF2       | Kruppel-like factor 2 (lung) [Source:HGNC Symbol;Acc:6347]                                                                 | 2.274460531 | 2.1802963   |
| AKAP2      | A kinase (PRKA) anchor protein 2 [Source:HGNC Symbol;Acc:372]                                                              | 2.856165807 | 2.17994355  |
| NCRNA00158 | uncharacterized                                                                                                            | 2.388044792 | 2.17863794  |
| FAM20A     | family with sequence similarity 20, member A [Source:HGNC Symbol;Acc:23015]                                                | 2.176183979 | 2.758230688 |
| FAM189A2   | family with sequence similarity 189, member A2 [Source:HGNC Symbol;Acc:24820]                                              | 2.174781241 | 4.471164725 |
| DCAF6      | DDB1 and CUL4 associated factor 6 [Source:HGNC Symbol;Acc:30002]                                                           | 2.170776283 | 2.254407007 |
| WIP1       | WD repeat domain, phosphoinositide interacting 1 [Source:HGNC Symbol;Acc:25471]                                            | 2.168329191 | 3.431342244 |
| LOC730755  | keratin associated protein 2-4-like [Source:HGNC Symbol;Acc:18891]                                                         | 2.184088013 | 2.167268265 |
| COL4A4     | collagen, type IV, alpha 4 [Source:HGNC Symbol;Acc:2206]                                                                   | 2.166842616 | 2.998745166 |
| ARHGAP29   | Rho GTPase activating protein 29 [Source:HGNC Symbol;Acc:30207]                                                            | 2.671035273 | 2.164680363 |
| DYNLT3     | dynein, light chain, Tctex-type 3 [Source:HGNC Symbol;Acc:11694]                                                           | 2.163982702 | 2.707940592 |
| DHRS9      | dehydrogenase/reductase (SDR family) member 9 [Source:HGNC Symbol;Acc:16888]                                               | 2.275631348 | 2.15956003  |
| SLC7A7     | solute carrier family 7 (amino acid transporter light chain, y+L system), member 7 [Source:HGNC Symbol;Acc:11065]          | 2.150410942 | 3.650493919 |
| VWC2       | von Willebrand factor C domain containing 2 [Source:HGNC Symbol;Acc:30200]                                                 | 2.149940383 | 2.729170841 |
| SLITRK6    | SLIT and NTRK-like family, member 6 [Source:HGNC Symbol;Acc:23503]                                                         | 2.639825079 | 2.149133322 |
| PAM        | peptidylglycine alpha-amidating monooxygenase [Source:HGNC Symbol;Acc:8596]                                                | 3.028789138 | 2.147368549 |
| LMNA       | lamin A/C [Source:HGNC Symbol;Acc:6636]                                                                                    | 2.146124785 | 2.181333329 |
| SLC25A4    | solute carrier family 25 (mitochondrial carrier; adenine nucleotide translocator), member 4 [Source:HGNC Symbol;Acc:10990] | 2.145499083 | 2.879252653 |
| JAZF1      | JAZF zinc finger 1 [Source:HGNC Symbol;Acc:28917]                                                                          | 2.14123603  | 2.266995089 |
| USP2       | ubiquitin specific peptidase 2 [Source:HGNC Symbol;Acc:12618]                                                              | 2.138104919 | 2.953795768 |
| FAM47E     | family with sequence similarity 47, member E [Source:HGNC Symbol;Acc:34343]                                                | 2.137806377 | 2.916606692 |
| CAMK2A     | calcium/calmodulin-dependent protein kinase II alpha [Source:HGNC Symbol;Acc:1460]                                         | 2.444858163 | 2.136153848 |
| HSPG2      | heparan sulfate proteoglycan 2 [Source:HGNC Symbol;Acc:5273]                                                               | 2.134351211 | 3.172611516 |
| COL11A1    | collagen, type XI, alpha 1 [Source:HGNC Symbol;Acc:2186]                                                                   | 2.131036355 | 2.423135945 |
| MYADM      | myeloid-associated differentiation marker [Source:HGNC Symbol;Acc:7544]                                                    | 2.129387658 | 2.96665991  |
| TEX2       | testis expressed 2 [Source:HGNC Symbol;Acc:30884]                                                                          | 2.151042802 | 2.128754626 |
| SP6        | Sp6 transcription factor [Source:HGNC Symbol;Acc:14530]                                                                    | 2.127316535 | 2.636213505 |
| ASB11      | ankyrin repeat and SOCS box containing 11 [Source:HGNC Symbol;Acc:17186]                                                   | 2.30666701  | 2.124774125 |
| NID2       | nidogen 2 (osteonidogen) [Source:HGNC Symbol;Acc:13389]                                                                    | 2.12380963  | 3.301707103 |
| ARHGEF37   | Rho guanine nucleotide exchange factor (GEF) 37 [Source:HGNC Symbol;Acc:34430]                                             | 2.129062188 | 2.122950075 |
| EGF        | epidermal growth factor [Source:HGNC Symbol;Acc:3229]                                                                      | 2.122317352 | 2.397806043 |
| PRKAR1A    | protein kinase, cAMP-dependent, regulatory, type I, alpha [Source:HGNC Symbol;Acc:9388]                                    | 2.44528867  | 2.11767231  |
| C10orf54   | chromosome 10 open reading frame 54 [Source:HGNC Symbol;Acc:30085]                                                         | 2.177170187 | 2.116499535 |
| AMBP       | alpha-1-microglobulin/bikunin precursor [Source:HGNC Symbol;Acc:453]                                                       | 2.114969834 | 2.497977547 |
| TRAK2      | trafficking protein, kinesin binding 2 [Source:HGNC Symbol;Acc:13206]                                                      | 2.309900276 | 2.114774492 |
| LAYN       | layilin [Source:HGNC Symbol;Acc:29471]                                                                                     | 2.112141387 | 3.232875442 |
| FOXP1      | forkhead box P1 [Source:HGNC Symbol;Acc:3823]                                                                              | 2.109816386 | 2.178936106 |
| PTPRM      | protein tyrosine phosphatase, receptor type, M [Source:HGNC Symbol;Acc:9675]                                               | 2.628340304 | 2.108680309 |
| PLP2       | proteolipid protein 2 (colonic epithelium-enriched) [Source:HGNC Symbol;Acc:9087]                                          | 2.102497981 | 4.145450962 |
| PMEPA1     | prostate transmembrane protein, androgen induced 1 [Source:HGNC Symbol;Acc:14107]                                          | 2.101951829 | 2.239031374 |
| PION       | pigeon homolog (Drosophila) [Source:HGNC Symbol;Acc:28042]                                                                 | 2.098167055 | 2.667599314 |
| MALAT1     | metastasis associated lung adenocarcinoma transcript 1 (non-protein coding) [Source:HGNC Symbol;Acc:29665]                 | 3.76810076  | 2.095856878 |
| MYOT       | myotilin [Source:HGNC Symbol;Acc:12399]                                                                                    | 2.31969309  | 2.095311407 |
| SEMA3D     | sema domain, immunoglobulin domain (Ig), short basic domain, secreted, (semaphorin) 3D [Source:HGNC Symbol;Acc:10726]      | 2.755605727 | 2.093991899 |
| SORCS3     | sortilin-related VPS10 domain containing receptor 3 [Source:HGNC Symbol;Acc:16699]                                         | 4.738306416 | 2.093959385 |
| COP22      | coatamer protein complex, subunit zeta 2 [Source:HGNC Symbol;Acc:19356]                                                    | 2.265703995 | 2.090999397 |
| TMEM178    | transmembrane protein 178A [Source:HGNC Symbol;Acc:28517]                                                                  | 2.478827924 | 2.08935444  |
| NEURL2     | neuralized homolog 2 (Drosophila) [Source:HGNC Symbol;Acc:16156]                                                           | 2.084726643 | 2.258787753 |
| ME3        | malic enzyme 3, NADP(+)-dependent, mitochondrial [Source:HGNC Symbol;Acc:6985]                                             | 2.080714637 | 2.33256751  |
| NUDT4      | nudix (nucleoside diphosphate linked moiety X)-type motif 4 [Source:HGNC Symbol;Acc:8051]                                  | 2.069832963 | 2.627299837 |
| EFHD1      | EF-hand domain family, member D1 [Source:HGNC Symbol;Acc:29556]                                                            | 2.403761277 | 2.068563885 |
| NOSTRIN    | nitric oxide synthase trafficker [Source:HGNC Symbol;Acc:20203]                                                            | 2.068551409 | 2.068792514 |
| UACA       | uveal autoantigen with coiled-coil domains and ankyrin repeats [Source:HGNC Symbol;Acc:15947]                              | 2.50137594  | 2.065944243 |
| CHRM2      | cholinergic receptor, muscarinic 2 [Source:HGNC Symbol;Acc:1951]                                                           | 2.070501125 | 2.061829668 |
| CCPG1      | cell cycle progression 1 [Source:HGNC Symbol;Acc:24227]                                                                    | 2.626527109 | 2.060469769 |
| PROS1      | protein S (alpha) [Source:HGNC Symbol;Acc:9456]                                                                            | 4.388856141 | 2.059171301 |
| LOXL1      | lysyl oxidase-like 1 [Source:HGNC Symbol;Acc:6665]                                                                         | 2.055112963 | 2.077978526 |
| CPA4       | carboxypeptidase A4 [Source:HGNC Symbol;Acc:15740]                                                                         | 3.5421202   | 2.04960982  |

|          |                                                                                                                 |             |             |
|----------|-----------------------------------------------------------------------------------------------------------------|-------------|-------------|
| SLC6A13  | solute carrier family 6 (neurotransmitter transporter, GABA), member 13 [Source:HGNC Symbol;Acc:11046]          | 2.709643237 | 2.044170594 |
| ROGDI    | rogdi homolog (Drosophila) [Source:HGNC Symbol;Acc:29478]                                                       | 2.051879251 | 2.041283918 |
| C8orf49  | chromosome 8 open reading frame 49 [Source:HGNC Symbol;Acc:32200]                                               | 2.157288026 | 2.040895542 |
| ADAM9    | ADAM metallopeptidase domain 9 [Source:HGNC Symbol;Acc:216]                                                     | 2.539942579 | 2.040440527 |
| SETD7    | SET domain containing (lysine methyltransferase) 7 [Source:HGNC Symbol;Acc:30412]                               | 3.511250581 | 2.039974523 |
| ARHGAP31 | Rho GTPase activating protein 31 [Source:HGNC Symbol;Acc:29216]                                                 | 2.205351184 | 2.0382251   |
| SSPN     | sarcospan [Source:HGNC Symbol;Acc:11322]                                                                        | 2.597203235 | 2.038042524 |
| TMEM88   | transmembrane protein 88 [Source:HGNC Symbol;Acc:32371]                                                         | 2.0360148   | 3.047439612 |
| SERPINA3 | serpin peptidase inhibitor, clade A (alpha-1 antiproteinase, antitrypsin), member 3 [Source:HGNC Symbol;Acc:16] | 2.034981572 | 2.03900297  |
| LAMC1    | laminin, gamma 1 (formerly LAMB2) [Source:HGNC Symbol;Acc:6492]                                                 | 2.034062537 | 2.958646804 |
| ADAMTS12 | ADAM metallopeptidase with thrombospondin type 1 motif, 12 [Source:HGNC Symbol;Acc:14605]                       | 2.145003904 | 2.032026332 |
| N4BP2L2  | NEDD4 binding protein 2-like 2 [Source:HGNC Symbol;Acc:26916]                                                   | 3.587936473 | 2.030876613 |
| CYR61    | cysteine-rich, angiogenic inducer, 61 [Source:HGNC Symbol;Acc:2654]                                             | 2.854504257 | 2.029073797 |
| TFAP2A   | transcription factor AP-2 alpha (activating enhancer binding protein 2 alpha) [Source:HGNC Symbol;Acc:11742]    | 2.86417953  | 2.024668214 |
| SLC20A2  | solute carrier family 20 (phosphate transporter), member 2 [Source:HGNC Symbol;Acc:10947]                       | 2.660372946 | 2.020731869 |
| ARHGEF9  | Cdc42 guanine nucleotide exchange factor (GEF) 9 [Source:HGNC Symbol;Acc:14561]                                 | 2.044891936 | 2.020660997 |
| CRIP1    | cysteine-rich protein 1 (intestinal) [Source:HGNC Symbol;Acc:2360]                                              | 2.020100094 | 2.971726462 |
| DUSP3    | dual specificity phosphatase 3 [Source:HGNC Symbol;Acc:3069]                                                    | 2.725743002 | 2.019618218 |
| ST8SIA5  | ST8 alpha-N-acetyl-neuraminide alpha-2,8-sialyltransferase 5 [Source:HGNC Symbol;Acc:17827]                     | 2.015553998 | 2.493493772 |
| AK2      | adenylate kinase 2 [Source:HGNC Symbol;Acc:362]                                                                 | 2.383000821 | 2.014802141 |
| PPFIBP1  | PTPRF interacting protein, binding protein 1 (liprin beta 1) [Source:HGNC Symbol;Acc:9249]                      | 2.014107575 | 2.333078879 |
| MCC      | mutated in colorectal cancers [Source:HGNC Symbol;Acc:6935]                                                     | 2.587639009 | 2.013572712 |
| SGMS1    | sphingomyelin synthase 1 [Source:HGNC Symbol;Acc:29799]                                                         | 2.012310517 | 2.696522529 |
| MSX2     | msh homeobox 2 [Source:HGNC Symbol;Acc:7392]                                                                    | 4.015808835 | 2.011075612 |
| ANXA2    | annexin A2 [Source:HGNC Symbol;Acc:537]                                                                         | 2.720696227 | 2.00845674  |
| PGPEP1   | pyroglutamyl-peptidase I [Source:HGNC Symbol;Acc:13568]                                                         | 2.005562033 | 2.96953967  |
| ADCY6    | adenylate cyclase 6 [Source:HGNC Symbol;Acc:237]                                                                | 2.179293559 | 2.004790283 |
| LIMS1    | LIM and senescent cell antigen-like domains 1 [Source:HGNC Symbol;Acc:6616]                                     | 2.308084787 | 2.004035749 |
| IL13RA1  | interleukin 13 receptor, alpha 1 [Source:HGNC Symbol;Acc:5974]                                                  | 2.374856357 | 2.001877374 |
| ABTB2    | ankyrin repeat and BTB (POZ) domain containing 2 [Source:HGNC Symbol;Acc:23842]                                 | 2.018842402 | 2.001410566 |
