# Supplementary material
Source: PubMed Central journal article supplement (PMC3973069)
Supplement: 13238_2013_16_MOESM9_ESM.pdf [file 13238_2013_16_MOESM9_ESM.pdf]

| Gene   | Protein                                                             | Diseases   | Mutations in DNA or protein sequence                                                                                                                           | References    |
|--------|---------------------------------------------------------------------|------------|----------------------------------------------------------------------------------------------------------------------------------------------------------------|---------------|
| PLN    | Phospholamban                                                       | HCM        | -42C>G, -77A>G                                                                                                                                                 | 1, 2          |
|        |                                                                     | DCM        | R9C, R14del                                                                                                                                                    | 3, 4          |
| MYH6   | myosin-6                                                            | HCM or DCM | R795Q, P830L, A1004S, Q1065H, E1457K                                                                                                                           | 5, 6          |
|        |                                                                     | ASD        | I820N                                                                                                                                                          | 7             |
| MYOZ2  | myozenin-2                                                          | HCM        | S48P, I246M                                                                                                                                                    | 8             |
| MYL2   | myosin regulatory light chain 2, ventricular/cardiac muscle isoform | HCM        | A13T, F18L, E22K, N47K, R58Q, K103E, IVS6-1G>C                                                                                                                 | 9, 10         |
| CSRP3  | cysteine and glycine-rich protein 3                                 | HCM        | L44P, S54R/E55G, C58G, 172T>G                                                                                                                                  | 11, 12        |
|        |                                                                     | DCM        | W4R                                                                                                                                                            | 13            |
| TTN    | titin                                                               | HCM        | R740L, S3799Y                                                                                                                                                  | 14            |
|        |                                                                     | DCM        | V54M, A743V, W930R, R25618Q, Q4053ter, S4465D, 2-bp insertion in exon 326                                                                                      | 14-16,        |
| LDB3   | LIM domain binding 3                                                | DCM        | D117N, K136M, S196L, T213I, I352M, D626N                                                                                                                       | 17, 18        |
|        |                                                                     | LVNC       | D117N, K136M, S196L                                                                                                                                            | 17            |
| MYH7   | myosin-7                                                            | HCM        | P211L, L390V, R403W, R403Q, R453C, Y501C, H576R, R663C, Q734P, I736T, G741W, A797T, R870H, A901G, D928N, E930K, R1053Q, E1356K, A1379T, A1454T, R1500W, S1776G | 19-24         |
|        |                                                                     | DCM        | I201T, T412N, A550V, T1019N, R1193S, E1426K, R1634S                                                                                                            | 25            |
|        |                                                                     | LVNC       | M531R                                                                                                                                                          | 26            |
| ANKRD1 | Ankyrin repeat domain-containing protein 1                          | TAPVR      | 10;21 translocation                                                                                                                                            | 27            |
| NPPB   | natriuretic peptides B preproprotein                                | HCM        | D175N                                                                                                                                                          | 28            |
|        |                                                                     | EH         | Variable number of tandem repeat of 5'-flanking region                                                                                                         | 29            |
| TNNT2  | troponin T type 2                                                   | DCM        | I79N, R141W, K210del                                                                                                                                           | 25, 30-32     |
|        |                                                                     | HCM        | I79N, I90M, R92C, R92W, F110I, K124N, R130C, R278C, G287A, Δexon 14, a five-base (CTTCT) insertion/deletion in intron 3                                        | 19, 23, 32-37 |
|        |                                                                     | RCM        | I79N, Q96del                                                                                                                                                   | 32, 38        |

|        |                                      |                 |                                                                                                                                                                                      |        |
|--------|--------------------------------------|-----------------|--------------------------------------------------------------------------------------------------------------------------------------------------------------------------------------|--------|
| NPPA   | natriuretic peptides A preproprotein | Ischemic Stroke | G664A                                                                                                                                                                                | 39, 40 |
|        |                                      | AF              | c.456–457delAA                                                                                                                                                                       | 41     |
|        |                                      | EH              | V7M, –C664G, G1837A, T2238C                                                                                                                                                          | 42, 43 |
|        |                                      | LVH             | -2843A>G                                                                                                                                                                             | 44     |
| TNNC1  | Troponin C type 1                    | HCM             | A8V, L29Q, A31S, C84Y, E122A, E134D, D145E                                                                                                                                           | 45-47  |
|        |                                      | DCM             | Y5H, M103I, D145E, I148V                                                                                                                                                             | 48     |
| ACTN2  | alpha-actinin-2                      | DCM             | Q9R                                                                                                                                                                                  | 49     |
| MYL3   | myosin light chain 3                 | HCM             | D778E                                                                                                                                                                                | 50     |
| GATA4  | transcription factor GATA-4          | CHD             | A6V, S52F, P163S, E216D, E359K, S377G, P407Q, S429T, A442V, IVS4+55C>A, c.1074delC                                                                                                   | 51-55  |
| RYR2   | ryanodine receptor 2                 | CPVT            | R414C, E1724K, A2254V, R2267H, A2394G, V2475F, F4020L, E4076K, N4104I, N4104K, H4108N, H4108Q, R4497C, S4565R, G4662S, H4762P, V4771I, P4902S, genomic deletion involved RYR2 exon-3 | 56-60  |
| MYOCD  | myocardin                            | CHD             | K259R                                                                                                                                                                                | 61     |
| TRIM63 | E3 ubiquitin-protein ligase TRIM63   | HCM             | A48V, I130M, Q247del                                                                                                                                                                 | 62     |

|       |                                                       |
|-------|-------------------------------------------------------|
| DCM   | Dilated Cardiomyopathy                                |
| HCM   | Hypertrophic Cardiomyopathy                           |
| RCM   | Restrictive Cardiomyopathy                            |
| ASD   | Atrial Septal Defect                                  |
| LVNC  | Left Ventricular Non-Compaction                       |
| TAPVR | Total Anomalous Pulmonary Venous Return               |
| EH    | Essential Hypertension                                |
| AF    | Atrial Fibrillation                                   |
| LVH   | Left Ventricular Hypertrophy                          |
| CPVT  | Catecholaminergic Polymorphic Ventricular Tachycardia |
| CHD   | Congenital Heart Disease                              |
| ARVC  | Arrhythmogenic Right Ventricular Cardiomyopathy       |

## References:

1 Minamisawa S, Sato Y, Tatsuguchi Y *et al.* Mutation of the phospholamban promoter associated with hypertrophic cardiomyopathy. *Biochemical and biophysical research communications* 2003;

304:1-4.

- 2 Medin M, Hermida-Prieto M, Monserrat L *et al.* Mutational screening of phospholamban gene in hypertrophic and idiopathic dilated cardiomyopathy and functional study of the PLN -42 C>G mutation. *European journal of heart failure* 2007; **9**:37-43.
- 3 Schmitt JP, Kamisago M, Asahi M *et al.* Dilated cardiomyopathy and heart failure caused by a mutation in phospholamban. *Science* 2003; **299**:1410-1413.
- 4 Haghghi K, Kolokathis F, Gramolini AO *et al.* A mutation in the human phospholamban gene, deleting arginine 14, results in lethal, hereditary cardiomyopathy. *Proceedings of the National Academy of Sciences of the United States of America* 2006; **103**:1388-1393.
- 5 Niimura H, Patton KK, McKenna WJ *et al.* Sarcomere protein gene mutations in hypertrophic cardiomyopathy of the elderly. *Circulation* 2002; **105**:446-451.
- 6 Carniel E, Taylor MR, Sinagra G *et al.* Alpha-myosin heavy chain: a sarcomeric gene associated with dilated and hypertrophic phenotypes of cardiomyopathy. *Circulation* 2005; **112**:54-59.
- 7 Ching YH, Ghosh TK, Cross SJ *et al.* Mutation in myosin heavy chain 6 causes atrial septal defect. *Nature genetics* 2005; **37**:423-428.
- 8 Osio A, Tan L, Chen SN *et al.* Myozenin 2 is a novel gene for human hypertrophic cardiomyopathy. *Circulation research* 2007; **100**:766-768.
- 9 Flavigny J, Richard P, Isnard R *et al.* Identification of two novel mutations in the ventricular regulatory myosin light chain gene (MYL2) associated with familial and classical forms of hypertrophic cardiomyopathy. *Journal of molecular medicine* 1998; **76**:208-214.
- 10 Morner S, Richard P, Kazzam E *et al.* Identification of the genotypes causing hypertrophic cardiomyopathy in northern Sweden. *Journal of molecular and cellular cardiology* 2003; **35**:841-849.
- 11 Geier C, Gehmlich K, Ehler E *et al.* Beyond the sarcomere: CSRP3 mutations cause hypertrophic cardiomyopathy. *Human molecular genetics* 2008; **17**:2753-2765.
- 12 Geier C, Perrot A, Ozcelik C *et al.* Mutations in the human muscle LIM protein gene in families with hypertrophic cardiomyopathy. *Circulation* 2003; **107**:1390-1395.
- 13 Knoll R, Hoshijima M, Hoffman HM *et al.* The cardiac mechanical stretch sensor machinery involves a Z disc complex that is defective in a subset of human dilated cardiomyopathy. *Cell* 2002; **111**:943-955.
- 14 Matsumoto Y, Hayashi T, Inagaki N *et al.* Functional analysis of titin/connectin N2-B mutations found in cardiomyopathy. *Journal of muscle research and cell motility* 2005; **26**:367-374.
- 15 Itoh-Satoh M, Hayashi T, Nishi H *et al.* Titin mutations as the molecular basis for dilated cardiomyopathy. *Biochemical and biophysical research communications* 2002; **291**:385-393.
- 16 Gerull B, Gramlich M, Atherton J *et al.* Mutations of TTN, encoding the giant muscle filament titin, cause familial dilated cardiomyopathy. *Nature genetics* 2002; **30**:201-204.
- 17 Vatta M, Mohapatra B, Jimenez S *et al.* Mutations in Cypher/ZASP in patients with dilated cardiomyopathy and left ventricular non-compaction. *Journal of the American College of Cardiology* 2003; **42**:2014-2027.
- 18 Arimura T, Hayashi T, Terada H *et al.* A Cypher/ZASP mutation associated with dilated cardiomyopathy alters the binding affinity to protein kinase C. *The Journal of biological chemistry* 2004; **279**:6746-6752.
- 19 Revera M, van der Merwe L, Heradien M *et al.* Troponin T and beta-myosin mutations have distinct cardiac functional effects in hypertrophic cardiomyopathy patients without hypertrophy. *Cardiovascular research* 2008; **77**:687-694.
- 20 Havndrup O, Bundgaard H, Andersen PS *et al.* A novel missense mutation, Leu390Val, in the cardiac beta-myosin heavy chain associated with pronounced septal hypertrophy in two families

- with hypertrophic cardiomyopathy. *Scandinavian cardiovascular journal* : SCJ 2000; **34**:558-563.
- 21 Blair E, Redwood C, de Jesus Oliveira M *et al*. Mutations of the light meromyosin domain of the beta-myosin heavy chain rod in hypertrophic cardiomyopathy. *Circulation research* 2002; **90**:263-269.
- 22 Perrot A, Schmidt-Traub H, Hoffmann B *et al*. Prevalence of cardiac beta-myosin heavy chain gene mutations in patients with hypertrophic cardiomyopathy. *Journal of molecular medicine* 2005; **83**:468-477.
- 23 Song L, Zou Y, Wang J *et al*. Mutations profile in Chinese patients with hypertrophic cardiomyopathy. *Clinica chimica acta; international journal of clinical chemistry* 2005; **351**:209-216.
- 24 Bashyam MD, Savithri GR, Gopikrishna M, Narasimhan C. A p.R870H mutation in the beta-cardiac myosin heavy chain 7 gene causes familial hypertrophic cardiomyopathy in several members of an Indian family. *The Canadian journal of cardiology* 2007; **23**:788-790.
- 25 Villard E, Duboscq-Bidot L, Charron P *et al*. Mutation screening in dilated cardiomyopathy: prominent role of the beta myosin heavy chain gene. *European heart journal* 2005; **26**:794-803.
- 26 Kaneda T, Naruse C, Kawashima A *et al*. A novel beta-myosin heavy chain gene mutation, p.Met531Arg, identified in isolated left ventricular non-compaction in humans, results in left ventricular hypertrophy that progresses to dilation in a mouse model. *Clinical science* 2008; **114**:431-440.
- 27 Cinquetti R, Badi I, Campione M *et al*. Transcriptional deregulation and a missense mutation define ANKRD1 as a candidate gene for total anomalous pulmonary venous return. *Human mutation* 2008; **29**:468-474.
- 28 Magga J, Sipola P, Vuolteenaho O *et al*. Significance of plasma levels of N-terminal Pro-B-type natriuretic peptide on left ventricular remodeling in non-obstructive hypertrophic cardiomyopathy attributable to the Asp175Asn mutation in the alpha-tropomyosin gene. *The American journal of cardiology* 2008; **101**:1185-1190.
- 29 Kosuge K, Soma M, Nakayama T *et al*. A novel variable number of tandem repeat of the natriuretic peptide precursor B gene's 5'-flanking region is associated with essential hypertension among Japanese females. *International journal of medical sciences* 2007; **4**:146-152.
- 30 Li D, Czernuszewicz GZ, Gonzalez O *et al*. Novel cardiac troponin T mutation as a cause of familial dilated cardiomyopathy. *Circulation* 2001; **104**:2188-2193.
- 31 Martins E, Silva-Cardoso J, Alves C *et al*. Familial dilated cardiomyopathy with troponin T K210del mutation. *Revista portuguesa de cardiologia : orgao oficial da Sociedade Portuguesa de Cardiologia = Portuguese journal of cardiology : an official journal of the Portuguese Society of Cardiology* 2006; **25**:295-300.
- 32 Menon SC, Michels VV, Pellikka PA *et al*. Cardiac troponin T mutation in familial cardiomyopathy with variable remodeling and restrictive physiology. *Clinical genetics* 2008; **74**:445-454.
- 33 Cuda G, Mussari A, Concolino D, Costanzo FS, Strisciuglio P. Co-existence of frataxin and cardiac troponin T gene mutations in a child with Friedreich Ataxia and familial hypertrophic cardiomyopathy. *Human mutation* 2002; **19**:309-310.
- 34 An FS, Zhang Y, Li DQ *et al*. [A novel missense mutation, K124N, in the troponin T gene of Chinese populations with hypertrophic cardiomyopathy]. *Zhonghua yi xue za zhi* 2004; **84**:1340-1343.
- 35 Gafurov B, Fredricksen S, Cai A, Brenner B, Chase PB, Chalovich JM. The Delta 14 mutation of human cardiac troponin T enhances ATPase activity and alters the cooperative binding of S1-ADP to regulated actin. *Biochemistry* 2004; **43**:15276-15285.

- 36 Garcia-Castro M, Reguero JR, Moris C *et al.* Prevalence and spectrum of mutations in the sarcomeric troponin T and I genes in a cohort of Spanish cardiac hypertrophy patients. *International journal of cardiology* 2007; **121**:115-116.
- 37 Xu C, Wei M, Su B *et al.* Ile90Met, a novel mutation in the cardiac troponin T gene for familial hypertrophic cardiomyopathy in a Chinese pedigree. *Genetics research* 2008; **90**:445-450.
- 38 Peddy SB, Vricella LA, Crosson JE *et al.* Infantile restrictive cardiomyopathy resulting from a mutation in the cardiac troponin T gene. *Pediatrics* 2006; **117**:1830-1833.
- 39 Gruchala M, Ciecwierz D, Wasag B *et al.* Association of the Scal atrial natriuretic peptide gene polymorphism with nonfatal myocardial infarction and extent of coronary artery disease. *American heart journal* 2003; **145**:125-131.
- 40 Rubattu S, Stanzione R, Di Angelantonio E *et al.* Atrial natriuretic peptide gene polymorphisms and risk of ischemic stroke in humans. *Stroke; a journal of cerebral circulation* 2004; **35**:814-818.
- 41 Hodgson-Zingman DM, Karst ML, Zingman LV *et al.* Atrial natriuretic peptide frameshift mutation in familial atrial fibrillation. *The New England journal of medicine* 2008; **359**:158-165.
- 42 Zhang S, Mao G, Zhang Y *et al.* Association between human atrial natriuretic peptide Val7Met polymorphism and baseline blood pressure, plasma trough irbesartan concentrations, and the antihypertensive efficacy of irbesartan in rural Chinese patients with essential hypertension. *Clinical therapeutics* 2005; **27**:1774-1784.
- 43 Rubattu S, Bigatti G, Evangelista A *et al.* Association of atrial natriuretic peptide and type a natriuretic peptide receptor gene polymorphisms with left ventricular mass in human essential hypertension. *Journal of the American College of Cardiology* 2006; **48**:499-505.
- 44 Xue H, Wang S, Wang H *et al.* Atrial natriuretic peptide gene promoter polymorphism is associated with left ventricular hypertrophy in hypertension. *Clinical science* 2008; **114**:131-137.
- 45 Landstrom AP, Parvatiyar MS, Pinto JR *et al.* Molecular and functional characterization of novel hypertrophic cardiomyopathy susceptibility mutations in TNNC1-encoded troponin C. *Journal of molecular and cellular cardiology* 2008; **45**:281-288.
- 46 Chung WK, Kitner C, Maron BJ. Novel frameshift mutation in Troponin C ( TNNC1) associated with hypertrophic cardiomyopathy and sudden death. *Cardiology in the young* 2011; **21**:345-348.
- 47 Dong WJ, Xing J, Ouyang Y, An J, Cheung HC. Structural kinetics of cardiac troponin C mutants linked to familial hypertrophic and dilated cardiomyopathy in troponin complexes. *The Journal of biological chemistry* 2008; **283**:3424-3432.
- 48 Pinto JR, Siegfried JD, Parvatiyar MS *et al.* Functional characterization of TNNC1 rare variants identified in dilated cardiomyopathy. *The Journal of biological chemistry* 2011; **286**:34404-34412.
- 49 Mohapatra B, Jimenez S, Lin JH *et al.* Mutations in the muscle LIM protein and alpha-actinin-2 genes in dilated cardiomyopathy and endocardial fibroelastosis. *Molecular genetics and metabolism* 2003; **80**:207-215.
- 50 Andersen PS, Havndrup O, Bundgaard H *et al.* Myosin light chain mutations in familial hypertrophic cardiomyopathy: phenotypic presentation and frequency in Danish and South African populations. *Journal of medical genetics* 2001; **38**:E43.
- 51 Okubo A, Miyoshi O, Baba K *et al.* A novel GATA4 mutation completely segregated with atrial septal defect in a large Japanese family. *Journal of medical genetics* 2004; **41**:e97.
- 52 Zhang L, Tumer Z, Jacobsen JR, Andersen PS, Tommerup N, Larsen LA. Screening of 99 Danish patients with congenital heart disease for GATA4 mutations. *Genetic testing* 2006; **10**:277-280.
- 53 Zhang W, Li X, Shen A, Jiao W, Guan X, Li Z. GATA4 mutations in 486 Chinese patients with congenital heart disease. *European journal of medical genetics* 2008; **51**:527-535.
- 54 Nemer G, Fadlalah F, Usta J *et al.* A novel mutation in the GATA4 gene in patients with

Tetralogy of Fallot. *Human mutation* 2006; **27**:293-294.

55 Schluterman MK, Krysiak AE, Kathiriya IS *et al.* Screening and biochemical analysis of GATA4 sequence variations identified in patients with congenital heart disease. *American journal of medical genetics Part A* 2007; **143A**:817-823.

56 George CH, Higgs GV, Lai FA. Ryanodine receptor mutations associated with stress-induced ventricular tachycardia mediate increased calcium release in stimulated cardiomyocytes. *Circulation research* 2003; **93**:531-540.

57 Tester DJ, Kopplin LJ, Will ML, Ackerman MJ. Spectrum and prevalence of cardiac ryanodine receptor (RyR2) mutations in a cohort of unrelated patients referred explicitly for long QT syndrome genetic testing. *Heart rhythm : the official journal of the Heart Rhythm Society* 2005; **2**:1099-1105.

58 Tester DJ, Dura M, Carturan E *et al.* A mechanism for sudden infant death syndrome (SIDS): stress-induced leak via ryanodine receptors. *Heart rhythm : the official journal of the Heart Rhythm Society* 2007; **4**:733-739.

59 Postma AV, Denjoy I, Kamblock J *et al.* Catecholaminergic polymorphic ventricular tachycardia: RYR2 mutations, bradycardia, and follow up of the patients. *Journal of medical genetics* 2005; **42**:863-870.

60 Bhuiyan ZA, van den Berg MP, van Tintelen JP *et al.* Expanding spectrum of human RYR2-related disease: new electrocardiographic, structural, and genetic features. *Circulation* 2007; **116**:1569-1576.

61 Ransom JF, King IN, Garg V, Srivastava D. A rare human sequence variant reveals myocardin autoinhibition. *The Journal of biological chemistry* 2008; **283**:35845-35852.

62 Chen SN, Czernuszewicz G, Tan Y *et al.* Human molecular genetic and functional studies identify TRIM63, encoding Muscle RING Finger Protein 1, as a novel gene for human hypertrophic cardiomyopathy. *Circulation research* 2012; **111**:907-919.
