# Supplementary material
Source: PubMed Central journal article supplement (PMC3973069)
Supplement: 13238_2013_16_MOESM10_ESM.pdf [file 13238_2013_16_MOESM10_ESM.pdf]

| Gene Name | Description and ID                                                                                                | DNA methylation |          |         |
|-----------|-------------------------------------------------------------------------------------------------------------------|-----------------|----------|---------|
|           |                                                                                                                   | ES-mCpG         | NSC-mCpG | CM-mCpG |
| NANOG     | Nanog homeobox [Source:HGNC Symbol;Acc:20857]                                                                     | 0.04            | 0.06     | 0.63    |
| SERPINB1  | serpin peptidase inhibitor, clade B (ovalbumin), member 1 [Source:HGNC Symbol;Acc:3311]                           | 0.16            | 0.13     | 0.64    |
| CBR1      | carbonyl reductase 1 [Source:HGNC Symbol;Acc:1548]                                                                | 0.02            | 0.15     | 0.53    |
| PM20D2    | peptidase M20 domain containing 2 [Source:HGNC Symbol;Acc:21408]                                                  | 0.19            | 0.29     | 0.66    |
| SKAP1     | src kinase associated phosphoprotein 1 [Source:HGNC Symbol;Acc:15605]                                             | 0.32            | 0.26     | 0.68    |
| ABCB4     | ATP-binding cassette, sub-family B (MDR/TAP), member 4 [Source:HGNC Symbol;Acc:45]                                | 0.08            | 0.02     | 0.43    |
| TUSC3     | tumor suppressor candidate 3 [Source:HGNC Symbol;Acc:30242]                                                       | 0.52            | 0.38     | 0.87    |
| HORMAD2   | HORMA domain containing 2 [Source:HGNC Symbol;Acc:28383]                                                          | 0.47            | 0.39     | 0.81    |
| LOXL3     | lysyl oxidase-like 3 [Source:HGNC Symbol;Acc:13869]                                                               | 0.18            | 0.17     | 0.51    |
| UAP1      | UDP-N-acetylglucosamine pyrophosphorylase 1 [Source:HGNC Symbol;Acc:12457]                                        | 0.53            | 0.26     | 0.84    |
| CPLX2     | complexin 2 [Source:HGNC Symbol;Acc:2310]                                                                         | 0.39            | 0.23     | 0.69    |
| CCDC81    | coiled-coil domain containing 81 [Source:HGNC Symbol;Acc:26281]                                                   | 0.3             | 0.16     | 0.59    |
| CREB5     | cAMP responsive element binding protein 5 [Source:HGNC Symbol;Acc:16844]                                          | 0.13            | 0.07     | 0.4     |
| GPR113    | G protein-coupled receptor 113 [Source:HGNC Symbol;Acc:18989]                                                     | 0.37            | 0.41     | 0.67    |
| AMN       | amion associated transmembrane protein [Source:HGNC Symbol;Acc:14604]                                             | 0.03            | 0.03     | 0.29    |
| PRELID2   | PRELI domain containing 2 [Source:HGNC Symbol;Acc:28306]                                                          | 0.01            | 0.02     | 0.28    |
| PTPLAD2   | protein tyrosine phosphatase-like A domain containing 2 [Source:HGNC Symbol;Acc:20920]                            | 0.22            | 0.43     | 0.68    |
| HSBP1L1   | heat shock factor binding protein 1-like 1 [Source:HGNC Symbol;Acc:37243]                                         | 0.57            | 0.53     | 0.82    |
| ATP2B2    | ATPase, Ca++ transporting, plasma membrane 2 [Source:HGNC Symbol;Acc:815]                                         | 0.37            | 0.33     | 0.62    |
| PRKAR2B   | protein kinase, cAMP-dependent, regulatory, type II, beta [Source:HGNC Symbol;Acc:9392]                           | 0.4             | 0.52     | 0.77    |
| GDF15     | growth differentiation factor 15 [Source:HGNC Symbol;Acc:30142]                                                   | 0.35            | 0.21     | 0.6     |
| A4GNT     | alpha-1,4-N-acetylglucosaminyltransferase [Source:HGNC Symbol;Acc:17968]                                          | 0.67            | 0.5      | 0.92    |
| MFSD2B    | major facilitator superfamily domain containing 2B [Source:HGNC Symbol;Acc:37207]                                 | 0.27            | 0.5      | 0.75    |
| CHD7      | chromodomain helicase DNA binding protein 7 [Source:HGNC Symbol;Acc:20626]                                        | 0.16            | 0.13     | 0.41    |
| LDHD      | lactate dehydrogenase D [Source:HGNC Symbol;Acc:19708]                                                            | 0.39            | 0.43     | 0.67    |
| PTPDC1    | protein tyrosine phosphatase domain containing 1 [Source:HGNC Symbol;Acc:30184]                                   | 0.4             | 0.39     | 0.64    |
| TIFA      | TRAF-interacting protein with forkhead-associated domain [Source:HGNC Symbol;Acc:19075]                           | 0.27            | 0.21     | 0.51    |
| FOXD2     | forkhead box D2 [Source:HGNC Symbol;Acc:3803]                                                                     | 0.26            | 0.29     | 0.52    |
| PASK      | PAS domain containing serine/threonine kinase [Source:HGNC Symbol;Acc:17270]                                      | 0.44            | 0.4      | 0.67    |
| HOXB2     | homeobox B2 [Source:HGNC Symbol;Acc:5113]                                                                         | 0.13            | 0.15     | 0.38    |
| RBM43     | RNA binding motif protein 43 [Source:HGNC Symbol;Acc:24790]                                                       | 0.2             | 0.24     | 0.47    |
| PDCL3     | phosducin-like 3 [Source:HGNC Symbol;Acc:28860]                                                                   | 0.47            | 0.29     | 0.7     |
| SERHL2    | serine hydrolase-like 2 [Source:HGNC Symbol;Acc:29446]                                                            | 0.02            | 0.12     | 0.34    |
| SERPINA11 | serpin peptidase inhibitor, clade A (alpha-1 antiprotease, antitrypsin), member 11 [Source:HGNC Symbol;Acc:19193] | 0.09            | 0.15     | 0.37    |
| ARHGAP9   | Rho GTPase activating protein 9 [Source:HGNC Symbol;Acc:14130]                                                    | 0.78            | 0.76     | 1       |
| OR10A5    | olfactory receptor, family 10, subfamily A, member 5 [Source:HGNC Symbol;Acc:15131]                               | 0.72            | 0.59     | 0.94    |
| PRAF2     | PRA1 domain family, member 2 [Source:HGNC Symbol;Acc:28911]                                                       | 0.44            | 0.46     | 0.67    |
| PLCL2     | phospholipase C-like 2 [Source:HGNC Symbol;Acc:9064]                                                              | 0.15            | 0.25     | 0.46    |
| MAT1A     | methionine adenosyltransferase I, alpha [Source:HGNC Symbol;Acc:6903]                                             | 0.27            | 0.41     | 0.62    |
| HLA-H     | major histocompatibility complex, class I, H (pseudogene) [Source:HGNC Symbol;Acc:4965]                           | 0.09            | 0.17     | 0.38    |
| C16orf54  | chromosome 16 open reading frame 54 [Source:HGNC Symbol;Acc:26649]                                                | 0.64            | 0.65     | 0.86    |
| OBP2B     | odorant binding protein 2B [Source:HGNC Symbol;Acc:23381]                                                         | 0.62            | 0.64     | 0.85    |
| ZNF239    | zinc finger protein 239 [Source:HGNC Symbol;Acc:13031]                                                            | 0.6             | 0.69     | 0.89    |
| HCK       | hemopoietic cell kinase [Source:HGNC Symbol;Acc:4840]                                                             | 0.23            | 0.35     | 0.55    |
| SPATA13   | spermatogenesis associated 13 [Source:HGNC Symbol;Acc:23222]                                                      | 0.13            | 0.07     | 0.33    |
| GRASP     | GRP1 (general receptor for phosphoinositides 1)-associated scaffold protein [Source:HGNC Symbol;Acc:18707]        | 0.41            | 0.29     | 0.61    |
| C1QTNF1   | C1q and tumor necrosis factor related protein 1 [Source:HGNC Symbol;Acc:14324]                                    | 0.33            | 0.12     | 0.53    |
| SLIT1     | slit homolog 1 (Drosophila) [Source:HGNC Symbol;Acc:11085]                                                        | 0.17            | 0.17     | 0.37    |
| DGAT2     | diacylglycerol O-acyltransferase 2 [Source:HGNC Symbol;Acc:16940]                                                 | 0.11            | 0.15     | 0.35    |
| NT5DC1    | 5'-nucleotidase domain containing 1 [Source:HGNC Symbol;Acc:21556]                                                | 0.45            | 0.47     | 0.66    |
| CYS1      | cystin 1 [Source:HGNC Symbol;Acc:18525]                                                                           | 0.37            | 0.35     | 0.56    |
| FEZ1      | fasciculation and elongation protein zeta 1 (zyglin I) [Source:HGNC Symbol;Acc:3659]                              | 0.51            | 0.58     | 0.77    |
| BACH2     | BTB and CNC homology 1, basic leucine zipper transcription factor 2 [Source:HGNC Symbol;Acc:14078]                | 0.51            | 0.58     | 0.77    |
| LRRTM3    | leucine rich repeat transmembrane neuronal 3 [Source:HGNC Symbol;Acc:19410]                                       | 0.59            | 0.74     | 0.93    |

|          |                                                                                                                                         |      |      |      |
|----------|-----------------------------------------------------------------------------------------------------------------------------------------|------|------|------|
| MFSD6L   | major facilitator superfamily domain containing 6-like [Source:HGNC Symbol;Acc:26656]                                                   | 0.42 | 0.58 | 0.77 |
| LRRC4    | leucine rich repeat containing 4 [Source:HGNC Symbol;Acc:15586]                                                                         | 0.21 | 0.21 | 0.4  |
| SLC26A4  | solute carrier family 26, member 4 [Source:HGNC Symbol;Acc:8818]                                                                        | 0.42 | 0.41 | 0.61 |
| SSFA2    | sperm specific antigen 2 [Source:HGNC Symbol;Acc:11319]                                                                                 | 0.3  | 0.26 | 0.49 |
| ESRRG    | estrogen-related receptor gamma [Source:HGNC Symbol;Acc:3474]                                                                           | 0.01 | 0.1  | 0.29 |
| CDKN1B   | cyclin-dependent kinase inhibitor 1B (p27, Kip1) [Source:HGNC Symbol;Acc:1785]                                                          | 0.16 | 0.06 | 0.35 |
| STXBPSL  | syntaxin binding protein 5-like [Source:HGNC Symbol;Acc:30757]                                                                          | 0.11 | 0.23 | 0.42 |
| KCNJ12   | potassium inwardly-rectifying channel, subfamily J, member 12 [Source:HGNC Symbol;Acc:6258]                                             | 0.64 | 0.67 | 0.86 |
| TCIRG1   | T-cell, immune regulator 1, ATPase, H+ transporting, lysosomal V0 subunit A3 [Source:HGNC Symbol;Acc:11647]                             | 0.78 | 0.68 | 0.97 |
| CXCL5    | chemokine (C-X-C motif) ligand 5 [Source:HGNC Symbol;Acc:10642]                                                                         | 0.44 | 0.55 | 0.74 |
| ST3GAL4  | ST3 beta-galactoside alpha-2,3-sialyltransferase 4 [Source:HGNC Symbol;Acc:10864]                                                       | 0.73 | 0.71 | 0.91 |
| NOXO1    | NADPH oxidase organizer 1 [Source:HGNC Symbol;Acc:19404]                                                                                | 0.72 | 0.67 | 0.9  |
| SLC46A3  | solute carrier family 46, member 3 [Source:HGNC Symbol;Acc:27501]                                                                       | 0.65 | 0.72 | 0.9  |
| SYN2     | synapsin II [Source:HGNC Symbol;Acc:11495]                                                                                              | 0.36 | 0.47 | 0.65 |
| MYH2     | myosin, heavy chain 2, skeletal muscle, adult [Source:HGNC Symbol;Acc:7572]                                                             | 0.47 | 0.32 | 0.65 |
| TMEM171  | transmembrane protein 171 [Source:HGNC Symbol;Acc:27031]                                                                                | 0.4  | 0.63 | 0.81 |
| PITX2    | paired-like homeodomain 2 [Source:HGNC Symbol;Acc:9005]                                                                                 | 0.13 | 0.15 | 0.33 |
| CLDN9    | claudin 9 [Source:HGNC Symbol;Acc:2051]                                                                                                 | 0.02 | 0.21 | 0.39 |
| GOLGA1   | golgin A1 [Source:HGNC Symbol;Acc:4424]                                                                                                 | 0.12 | 0.13 | 0.31 |
| HPS1     | Hermansky-Pudlak syndrome 1 [Source:HGNC Symbol;Acc:5163]                                                                               | 0.42 | 0.39 | 0.6  |
| NEURL    | neuronalized homolog (Drosophila) [Source:HGNC Symbol;Acc:7761]                                                                         | 0.37 | 0.41 | 0.59 |
| TP53BP1  | tumor protein p53 binding protein 1 [Source:HGNC Symbol;Acc:11999]                                                                      | 0.09 | 0.13 | 0.31 |
| DSP      | desmoplakin [Source:HGNC Symbol;Acc:3052]                                                                                               | 0.14 | 0.2  | 0.38 |
| KCTD17   | potassium channel tetramerisation domain containing 17 [Source:HGNC Symbol;Acc:25705]                                                   | 0.24 | 0.18 | 0.42 |
| TM4SF18  | transmembrane 4 L six family member 18 [Source:HGNC Symbol;Acc:25181]                                                                   | 0.1  | 0.24 | 0.42 |
| ZMAT1    | zinc finger, matrin-type 1 [Source:HGNC Symbol;Acc:29377]                                                                               | 0.54 | 0.54 | 0.72 |
| RBP4     | retinol binding protein 4, plasma [Source:HGNC Symbol;Acc:9922]                                                                         | 0.44 | 0.51 | 0.69 |
| HLA-DPA1 | major histocompatibility complex, class II, DP alpha 1 [Source:HGNC Symbol;Acc:4938]                                                    | 0.69 | 0.7  | 0.87 |
| AQP9     | aquaporin 9 [Source:HGNC Symbol;Acc:643]                                                                                                | 0.61 | 0.55 | 0.78 |
| RUSC1    | RUN and SH3 domain containing 1 [Source:HGNC Symbol;Acc:17153]                                                                          | 0.44 | 0.51 | 0.68 |
| LYPD6    | LY6/PLAUR domain containing 6 [Source:HGNC Symbol;Acc:28751]                                                                            | 0.34 | 0.48 | 0.65 |
| ACPL2    | acid phosphatase-like 2 [Source:HGNC Symbol;Acc:26303]                                                                                  | 0.35 | 0.61 | 0.78 |
| ATP8A1   | ATPase, aminophospholipid transporter (APLT), class I, type 8A, member 1 [Source:HGNC Symbol;Acc:13531]                                 | 0    | 0    | 0.17 |
| CNKSR2   | connector enhancer of kinase suppressor of Ras 2 [Source:HGNC Symbol;Acc:19701]                                                         | 0.15 | 0.11 | 0.32 |
| NUDT19   | nudix (nucleoside diphosphate linked moiety X)-type motif 19 [Source:HGNC Symbol;Acc:32036]                                             | 0.07 | 0.15 | 0.32 |
| TMEM30B  | transmembrane protein 30B [Source:HGNC Symbol;Acc:27254]                                                                                | 0.04 | 0.15 | 0.32 |
| DDX60L   | DEAD (Asp-Glu-Ala-Asp) box polypeptide 60-like [Source:HGNC Symbol;Acc:26429]                                                           | 0.37 | 0.45 | 0.62 |
| CACNG4   | calcium channel, voltage-dependent, gamma subunit 4 [Source:HGNC Symbol;Acc:1408]                                                       | 0.13 | 0.24 | 0.41 |
| SHISA5   | shisa homolog 5 (Xenopus laevis) [Source:HGNC Symbol;Acc:30376]                                                                         | 0.76 | 0.77 | 0.94 |
| HLA-DRA  | major histocompatibility complex, class II, DR alpha [Source:HGNC Symbol;Acc:4947]                                                      | 0.47 | 0.52 | 0.69 |
| PPP3CC   | protein phosphatase 3, catalytic subunit, gamma isozyme [Source:HGNC Symbol;Acc:9316]                                                   | 0.56 | 0.67 | 0.84 |
| ACVR1C   | activin A receptor, type IC [Source:HGNC Symbol;Acc:18123]                                                                              | 0.4  | 0.4  | 0.56 |
| TNNI3    | troponin I type 3 (cardiac) [Source:HGNC Symbol;Acc:11947]                                                                              | 0.72 | 0.71 | 0.88 |
| NCKAP1L  | NCK-associated protein 1-like [Source:HGNC Symbol;Acc:4862]                                                                             | 0.75 | 0.74 | 0.91 |
| TNFRSF8  | tumor necrosis factor receptor superfamily, member 8 [Source:HGNC Symbol;Acc:11923]                                                     | 0.1  | 0.12 | 0.28 |
| GABRA5   | gamma-aminobutyric acid (GABA) A receptor, alpha 5 [Source:HGNC Symbol;Acc:4079]                                                        | 0.59 | 0.63 | 0.79 |
| VPREB3   | pre-B lymphocyte 3 [Source:HGNC Symbol;Acc:12710]                                                                                       | 0.69 | 0.73 | 0.89 |
| MLKL     | mixed lineage kinase domain-like [Source:HGNC Symbol;Acc:26617]                                                                         | 0.03 | 0.11 | 0.27 |
| GCC2     | GRIP and coiled-coil domain containing 2 [Source:HGNC Symbol;Acc:23218]                                                                 | 0.49 | 0.41 | 0.65 |
| C9orf172 | chromosome 9 open reading frame 172 [Source:HGNC Symbol;Acc:37284]                                                                      | 0.7  | 0.61 | 0.86 |
| PKDREJ   | polycystic kidney disease (polycystin) and REJ homolog (sperm receptor for egg jelly homolog, sea urchin) [Source:HGNC Symbol;Acc:9015] | 0.38 | 0.52 | 0.68 |
| SPINT3   | serine peptidase inhibitor, Kunitz type, 3 [Source:HGNC Symbol;Acc:11248]                                                               | 0.72 | 0.52 | 0.88 |
| INHBE    | inhibin, beta E [Source:HGNC Symbol;Acc:24029]                                                                                          | 0.28 | 0.51 | 0.67 |
| NMI      | N-myc (and STAT) interactor [Source:HGNC Symbol;Acc:7854]                                                                               | 0.04 | 0.38 | 0.54 |
| AKAP2    | A kinase (PRKA) anchor protein 2 [Source:HGNC Symbol;Acc:372]                                                                           | 0.03 | 0.04 | 0.2  |
| SYT7     | synaptotagmin VII [Source:HGNC Symbol;Acc:11514]                                                                                        | 0.22 | 0.13 | 0.38 |
| TACC2    | transforming, acidic coiled-coil containing protein 2 [Source:HGNC Symbol;Acc:11523]                                                    | 0.19 | 0.14 | 0.35 |
| FCHO2    | FCH domain only 2 [Source:HGNC Symbol;Acc:25180]                                                                                        | 0.37 | 0.42 | 0.58 |

|          |                                                                                                                                                                                         |      |      |      |
|----------|-----------------------------------------------------------------------------------------------------------------------------------------------------------------------------------------|------|------|------|
| PCDHB16  | protocadherin beta 16 [Source:HGNC Symbol;Acc:14546]                                                                                                                                    | 0    | 0.05 | 0.21 |
| PRICKLE2 | prickle homolog 2 (Drosophila) [Source:HGNC Symbol;Acc:20340]                                                                                                                           | 0.32 | 0.25 | 0.48 |
| RNASEL   | ribonuclease L (2',5'-oligoadenylate synthetase-dependent) [Source:HGNC Symbol;Acc:10050]                                                                                               | 0.43 | 0.31 | 0.59 |
| GPBAR1   | G protein-coupled bile acid receptor 1 [Source:HGNC Symbol;Acc:19680]                                                                                                                   | 0.81 | 0.66 | 0.97 |
| CTGF     | connective tissue growth factor [Source:HGNC Symbol;Acc:2500]                                                                                                                           | 0.18 | 0.17 | 0.33 |
| KCNH3    | potassium voltage-gated channel, subfamily H (eag-related), member 3 [Source:HGNC Symbol;Acc:6252]                                                                                      | 0.3  | 0.29 | 0.45 |
| BEGAIN   | brain-enriched guanylate kinase-associated [Source:HGNC Symbol;Acc:24163]                                                                                                               | 0.6  | 0.61 | 0.76 |
| PYCARD   | PYD and CARD domain containing [Source:HGNC Symbol;Acc:16608]                                                                                                                           | 0.62 | 0.63 | 0.78 |
| OTUB2    | OTU domain, ubiquitin aldehyde binding 2 [Source:HGNC Symbol;Acc:20351]                                                                                                                 | 0.64 | 0.62 | 0.79 |
| LSMD1    | LSM domain containing 1 [Source:HGNC Symbol;Acc:28212]                                                                                                                                  | 0.05 | 0.08 | 0.23 |
| IGLL1    | immunoglobulin lambda-like polypeptide 1 [Source:HGNC Symbol;Acc:5870]                                                                                                                  | 0.72 | 0.68 | 0.87 |
| SOX15    | SRY (sex determining region Y)-box 15 [Source:HGNC Symbol;Acc:11196]                                                                                                                    | 0.57 | 0.61 | 0.76 |
| GJB4     | gap junction protein, beta 4, 30.3kDa [Source:HGNC Symbol;Acc:4286]                                                                                                                     | 0.74 | 0.67 | 0.89 |
| OR4C11   | olfactory receptor, family 4, subfamily C, member 11 [Source:HGNC Symbol;Acc:15167]                                                                                                     | 0.85 | 0.67 | 1    |
| GPR85    | G protein-coupled receptor 85 [Source:HGNC Symbol;Acc:4536]                                                                                                                             | 0.09 | 0.09 | 0.24 |
| TBX5     | T-box 5 [Source:HGNC Symbol;Acc:11604]                                                                                                                                                  | 0.03 | 0.02 | 0.18 |
| DLEU7    | deleted in lymphocytic leukemia, 7 [Source:HGNC Symbol;Acc:17567]                                                                                                                       | 0.06 | 0.04 | 0.21 |
| HOXB3    | homeobox B3 [Source:HGNC Symbol;Acc:5114]                                                                                                                                               | 0.06 | 0.03 | 0.21 |
| PEX7     | peroxisomal biogenesis factor 7 [Source:HGNC Symbol;Acc:8860]                                                                                                                           | 0.3  | 0.34 | 0.49 |
| GUCA2B   | guanylate cyclase activator 2B (uroguanylin) [Source:HGNC Symbol;Acc:4683]                                                                                                              | 0.79 | 0.76 | 0.94 |
| PDE1B    | phosphodiesterase 1B, calmodulin-dependent [Source:HGNC Symbol;Acc:8775]                                                                                                                | 0.5  | 0.55 | 0.7  |
| ZNF674   | zinc finger protein 674 [Source:HGNC Symbol;Acc:17625]                                                                                                                                  | 0.55 | 0.49 | 0.7  |
| CNPY1    | canopy 1 homolog (zebrafish) [Source:HGNC Symbol;Acc:27786]                                                                                                                             | 0.42 | 0.36 | 0.56 |
| NES      | nestin [Source:HGNC Symbol;Acc:7756]                                                                                                                                                    | 0.02 | 0.01 | 0.16 |
| ZNF700   | zinc finger protein 700 [Source:HGNC Symbol;Acc:25292]                                                                                                                                  | 0.08 | 0.07 | 0.22 |
| SLC3A1   | solute carrier family 3 (cystine, dibasic and neutral amino acid transporters, activator of cystine, dibasic and neutral amino acid transport), member 1 [Source:HGNC Symbol;Acc:11025] | 0.86 | 0.85 | 1    |
| SLC7A10  | solute carrier family 7 (neutral amino acid transporter light chain, asc system), member 10 [Source:HGNC Symbol;Acc:11058]                                                              | 0.7  | 0.68 | 0.84 |
| LEMD3    | LEM domain containing 3 [Source:HGNC Symbol;Acc:28887]                                                                                                                                  | 0.66 | 0.64 | 0.8  |
| IRF2     | interferon regulatory factor 2 [Source:HGNC Symbol;Acc:6117]                                                                                                                            | 0.08 | 0.05 | 0.22 |
| C14orf93 | chromosome 14 open reading frame 93 [Source:HGNC Symbol;Acc:20162]                                                                                                                      | 0.1  | 0.13 | 0.27 |
| CABP7    | calcium binding protein 7 [Source:HGNC Symbol;Acc:20834]                                                                                                                                | 0.64 | 0.61 | 0.78 |
| CHKA     | choline kinase alpha [Source:HGNC Symbol;Acc:1937]                                                                                                                                      | 0.36 | 0.39 | 0.53 |
| COLQ     | collagen-like tail subunit (single strand of homotrimer) of asymmetric acetylcholinesterase [Source:HGNC Symbol;Acc:2226]                                                               | 0.86 | 0.82 | 1    |
| APOA2    | apolipoprotein A-II [Source:HGNC Symbol;Acc:601]                                                                                                                                        | 0.82 | 0.86 | 1    |
| DLEC1    | deleted in lung and esophageal cancer 1 [Source:HGNC Symbol;Acc:2899]                                                                                                                   | 0.48 | 0.52 | 0.66 |
| SLC17A7  | solute carrier family 17 (sodium-dependent inorganic phosphate cotransporter), member 7 [Source:HGNC Symbol;Acc:16704]                                                                  | 0.68 | 0.73 | 0.87 |
| ADAM8    | ADAM metallopeptidase domain 8 [Source:HGNC Symbol;Acc:215]                                                                                                                             | 0.66 | 0.6  | 0.8  |
| IQCF2    | IQ motif containing F2 [Source:HGNC Symbol;Acc:31815]                                                                                                                                   | 0.86 | 0.79 | 1    |
| TCF7L1   | transcription factor 7-like 1 (T-cell specific, HMG-box) [Source:HGNC Symbol;Acc:11640]                                                                                                 | 0.58 | 0.66 | 0.8  |
| PRRT1    | proline-rich transmembrane protein 1 [Source:HGNC Symbol;Acc:13943]                                                                                                                     | 0.08 | 0.19 | 0.33 |
| EMP3     | epithelial membrane protein 3 [Source:HGNC Symbol;Acc:3335]                                                                                                                             | 0.29 | 0.1  | 0.43 |
| AHNAK2   | AHNAK nucleoprotein 2 [Source:HGNC Symbol;Acc:20125]                                                                                                                                    | 0.19 | 0.38 | 0.52 |
| RBM24    | RNA binding motif protein 24 [Source:HGNC Symbol;Acc:21539]                                                                                                                             | 0.66 | 0.03 | 0.8  |
| APCDD1   | adenomatosis polyposis coli down-regulated 1 [Source:HGNC Symbol;Acc:15718]                                                                                                             | 0.21 | 0.19 | 0.35 |
| TNFSF11  | tumor necrosis factor (ligand) superfamily, member 11 [Source:HGNC Symbol;Acc:11926]                                                                                                    | 0.13 | 0.17 | 0.31 |
| ACADL    | acyl-CoA dehydrogenase, long chain [Source:HGNC Symbol;Acc:88]                                                                                                                          | 0.14 | 0.22 | 0.36 |
| RAB21    | RAB21, member RAS oncogene family [Source:HGNC Symbol;Acc:18263]                                                                                                                        | 0.17 | 0.04 | 0.31 |
| RIPK3    | receptor-interacting serine-threonine kinase 3 [Source:HGNC Symbol;Acc:10021]                                                                                                           | 0.33 | 0.34 | 0.48 |
| C11orf70 | chromosome 11 open reading frame 70 [Source:HGNC Symbol;Acc:28188]                                                                                                                      | 0.22 | 0.28 | 0.42 |
| TAPBP    | TAP binding protein (tapasin) [Source:HGNC Symbol;Acc:11566]                                                                                                                            | 0.17 | 0.28 | 0.42 |
| TRIM21   | tripartite motif containing 21 [Source:HGNC Symbol;Acc:11312]                                                                                                                           | 0.78 | 0.78 | 0.91 |
| INPP4A   | inositol polyphosphate-4-phosphatase, type I, 107kDa [Source:HGNC Symbol;Acc:6074]                                                                                                      | 0.06 | 0.06 | 0.19 |
| POLE4    | polymerase (DNA-directed), epsilon 4, accessory subunit [Source:HGNC Symbol;Acc:18755]                                                                                                  | 0.04 | 0.04 | 0.17 |
| ARID3C   | AT rich interactive domain 3C (BRIGHT-like) [Source:HGNC Symbol;Acc:21209]                                                                                                              | 0.71 | 0.71 | 0.84 |
| CNTN2    | contactin 2 (axonal) [Source:HGNC Symbol;Acc:2172]                                                                                                                                      | 0.61 | 0.62 | 0.75 |
| TICAM2   | toll-like receptor adaptor molecule 2 [Source:HGNC Symbol;Acc:21354]                                                                                                                    | 0.08 | 0.06 | 0.21 |
| TICAM1   | toll-like receptor adaptor molecule 1 [Source:HGNC Symbol;Acc:18348]                                                                                                                    | 0.04 | 0.06 | 0.19 |
| LRRC32   | leucine rich repeat containing 32 [Source:HGNC Symbol;Acc:4161]                                                                                                                         | 0.2  | 0.17 | 0.33 |
| DNLZ     | DNL-type zinc finger [Source:HGNC Symbol;Acc:33879]                                                                                                                                     | 0.32 | 0.36 | 0.49 |
| FRMPD4   | FERM and PDZ domain containing 4 [Source:HGNC Symbol;Acc:29007]                                                                                                                         | 0.36 | 0.4  | 0.53 |
| THPO     | thrombopoietin [Source:HGNC Symbol;Acc:11795]                                                                                                                                           | 0.75 | 0.7  | 0.88 |
| EFNA2    | ephrin-A2 [Source:HGNC Symbol;Acc:3222]                                                                                                                                                 | 0.14 | 0.2  | 0.33 |

|          |                                                                                                                       |      |      |      |
|----------|-----------------------------------------------------------------------------------------------------------------------|------|------|------|
| ADCY1    | adenylate cyclase 1 (brain) [Source:HGNC Symbol;Acc:232]                                                              | 0.62 | 0.68 | 0.81 |
| FMOD     | fibromodulin [Source:HGNC Symbol;Acc:3774]                                                                            | 0.69 | 0.62 | 0.82 |
| OR5V1    | olfactory receptor, family 5, subfamily V, member 1 [Source:HGNC Symbol;Acc:13972]                                    | 0.78 | 0.71 | 0.91 |
| FAIM2    | Fas apoptotic inhibitory molecule 2 [Source:HGNC Symbol;Acc:17067]                                                    | 0.74 | 0.65 | 0.87 |
| SNRNP48  | small nuclear ribonucleoprotein 48kDa (U11/U12) [Source:HGNC Symbol;Acc:21368]                                        | 0.36 | 0.27 | 0.49 |
| ADAMTS8  | ADAM metalloproteinase with thrombospondin type 1 motif, 8 [Source:HGNC Symbol;Acc:224]                               | 0.68 | 0.59 | 0.81 |
| ANP32B   | acidic (leucine-rich) nuclear phosphoprotein 32 family, member B [Source:HGNC Symbol;Acc:16677]                       | 0.08 | 0.18 | 0.31 |
| ABCC3    | ATP-binding cassette, sub-family C (CFTR/MRP), member 3 [Source:HGNC Symbol;Acc:54]                                   | 0.27 | 0.17 | 0.4  |
| C15orf56 | chromosome 15 open reading frame 56 [Source:HGNC Symbol;Acc:33868]                                                    | 0.53 | 0.65 | 0.78 |
| ADO      | 2-aminoethanethiol (cysteamine) dioxygenase [Source:HGNC Symbol;Acc:23506]                                            | 0.71 | 0.56 | 0.84 |
| ADAMTS2  | ADAM metalloproteinase with thrombospondin type 1 motif, 2 [Source:HGNC Symbol;Acc:218]                               | 0.31 | 0.48 | 0.61 |
| CD72     | CD72 molecule [Source:HGNC Symbol;Acc:1696]                                                                           | 0.87 | 0.69 | 1    |
| CTDSPL   | CTD (carboxy-terminal domain, RNA polymerase II, polypeptide A) small phosphatase-like [Source:HGNC Symbol;Acc:16890] | 0.52 | 0.29 | 0.65 |
| TNFSF10  | tumor necrosis factor (ligand) superfamily, member 10 [Source:HGNC Symbol;Acc:11925]                                  | 0.54 | 0.28 | 0.67 |
| ABCF2    | ATP-binding cassette, sub-family F (GCN20), member 2 [Source:HGNC Symbol;Acc:71]                                      | 0.28 | 0.28 | 0.41 |
| C11orf93 | chromosome 11 open reading frame 93 [Source:HGNC Symbol;Acc:26978]                                                    | 0.19 | 0.34 | 0.47 |
| HOXB1    | homeobox B1 [Source:HGNC Symbol;Acc:5111]                                                                             | 0.19 | 0.34 | 0.47 |
| PAX5     | paired box 5 [Source:HGNC Symbol;Acc:8619]                                                                            | 0.56 | 0.53 | 0.69 |
| RASSF1   | Ras association (RalGDS/AF-6) domain family member 1 [Source:HGNC Symbol;Acc:9882]                                    | 0.17 | 0.42 | 0.54 |
| STC1     | stanniocalcin 1 [Source:HGNC Symbol;Acc:11373]                                                                        | 0.02 | 0.02 | 0.14 |
| PPP1R16B | protein phosphatase 1, regulatory subunit 16B [Source:HGNC Symbol;Acc:15850]                                          | 0.01 | 0.02 | 0.14 |
| PATZ1    | POZ (BTB) and AT hook containing zinc finger 1 [Source:HGNC Symbol;Acc:13071]                                         | 0.04 | 0.05 | 0.17 |
| ACP2     | acid phosphatase 2, lysosomal [Source:HGNC Symbol;Acc:123]                                                            | 0.55 | 0.55 | 0.67 |
| GLIPR1L2 | GLI pathogenesis-related 1 like 2 [Source:HGNC Symbol;Acc:28592]                                                      | 0.6  | 0.6  | 0.72 |
| SULT1C2  | sulfotransferase family, cytosolic, 1C, member 2 [Source:HGNC Symbol;Acc:11456]                                       | 0.19 | 0.18 | 0.31 |
| ESYT3    | extended synaptotagmin-like protein 3 [Source:HGNC Symbol;Acc:24295]                                                  | 0.6  | 0.59 | 0.72 |
| SLC36A2  | solute carrier family 36 (proton/amino acid symporter), member 2 [Source:HGNC Symbol;Acc:18762]                       | 0.78 | 0.77 | 0.9  |
| NRIP2    | nuclear receptor interacting protein 2 [Source:HGNC Symbol;Acc:23078]                                                 | 0.49 | 0.5  | 0.62 |
| IL6      | interleukin 6 (interferon, beta 2) [Source:HGNC Symbol;Acc:6018]                                                      | 0.59 | 0.6  | 0.72 |
| ATRX     | alpha thalassemia/mental retardation syndrome X-linked [Source:HGNC Symbol;Acc:886]                                   | 0.35 | 0.33 | 0.47 |
| CYB5D1   | cytochrome b5 domain containing 1 [Source:HGNC Symbol;Acc:26516]                                                      | 0.04 | 0.06 | 0.18 |
| BTBD18   | BTB (POZ) domain containing 18 [Source:HGNC Symbol;Acc:37214]                                                         | 0.54 | 0.52 | 0.66 |
| RCN3     | reticulocalbin 3, EF-hand calcium binding domain [Source:HGNC Symbol;Acc:21145]                                       | 0.74 | 0.76 | 0.88 |
| MYT1L    | myelin transcription factor 1-like [Source:HGNC Symbol;Acc:7623]                                                      | 0.6  | 0.62 | 0.74 |
| PACS2    | phosphofurin acidic cluster sorting protein 2 [Source:HGNC Symbol;Acc:23794]                                          | 0.36 | 0.33 | 0.48 |
| FYCO1    | FYVE and coiled-coil domain containing 1 [Source:HGNC Symbol;Acc:14673]                                               | 0.09 | 0.06 | 0.21 |
| FAM155B  | family with sequence similarity 155, member B [Source:HGNC Symbol;Acc:30701]                                          | 0.53 | 0.5  | 0.65 |
| ENTPD2   | ectonucleoside triphosphate diphosphohydrolase 2 [Source:HGNC Symbol;Acc:3364]                                        | 0.55 | 0.59 | 0.71 |
| ATPBD4   | ATP binding domain 4 [Source:HGNC Symbol;Acc:30543]                                                                   | 0.06 | 0.02 | 0.18 |
| STARD8   | StAR-related lipid transfer (START) domain containing 8 [Source:HGNC Symbol;Acc:19161]                                | 0.6  | 0.55 | 0.72 |
| MPZL2    | myelin protein zero-like 2 [Source:HGNC Symbol;Acc:3496]                                                              | 0.5  | 0.45 | 0.62 |
| BCL6     | B-cell CLL/lymphoma 6 [Source:HGNC Symbol;Acc:1001]                                                                   | 0.74 | 0.79 | 0.91 |
| DFNA5    | deafness, autosomal dominant 5 [Source:HGNC Symbol;Acc:2810]                                                          | 0.27 | 0.33 | 0.45 |
| RAET1E   | retinoic acid early transcript 1E [Source:HGNC Symbol;Acc:16793]                                                      | 0.88 | 0.82 | 1    |
| SPAG17   | sperm associated antigen 17 [Source:HGNC Symbol;Acc:26620]                                                            | 0.61 | 0.54 | 0.73 |
| C1orf116 | chromosome 1 open reading frame 116 [Source:HGNC Symbol;Acc:28667]                                                    | 0.77 | 0.7  | 0.89 |
| PAK3     | p21 protein (Cdc42/Rac)-activated kinase 3 [Source:HGNC Symbol;Acc:8592]                                              | 0.25 | 0.33 | 0.45 |
| LRRTM1   | leucine rich repeat transmembrane neuronal 1 [Source:HGNC Symbol;Acc:19408]                                           | 0.2  | 0.29 | 0.41 |
| FNBP1    | formin binding protein 1 [Source:HGNC Symbol;Acc:17069]                                                               | 0.23 | 0.32 | 0.44 |
| KCNA4    | potassium voltage-gated channel, shaker-related subfamily, member 4 [Source:HGNC Symbol;Acc:6222]                     | 0.78 | 0.65 | 0.9  |
| LPO      | lactoperoxidase [Source:HGNC Symbol;Acc:6678]                                                                         | 0.83 | 0.69 | 0.95 |
| RAG1     | recombination activating gene 1 [Source:HGNC Symbol;Acc:9831]                                                         | 0.82 | 0.67 | 0.94 |
| ZNF211   | zinc finger protein 211 [Source:HGNC Symbol;Acc:13003]                                                                | 0.62 | 0.46 | 0.74 |

|           |                                                                                                                       |      |      |      |
|-----------|-----------------------------------------------------------------------------------------------------------------------|------|------|------|
| CD79A     | CD79a molecule, immunoglobulin-associated alpha [Source:HGNC Symbol;Acc:1698]                                         | 0.74 | 0.56 | 0.86 |
| PXK       | PX domain containing serine/threonine kinase [Source:HGNC Symbol;Acc:23326]                                           | 0.88 | 0.7  | 1    |
| ARHGAP32  | Rho GTPase activating protein 32 [Source:HGNC Symbol;Acc:17399]                                                       | 0.84 | 0.65 | 0.96 |
| PALM3     | paralemmin 3 [Source:HGNC Symbol;Acc:33274]                                                                           | 0.48 | 0.29 | 0.6  |
| REM2      | RAS (RAD and GEM)-like GTP binding 2 [Source:HGNC Symbol;Acc:20248]                                                   | 0.59 | 0.39 | 0.71 |
| ANTXR1    | anthrax toxin receptor 1 [Source:HGNC Symbol;Acc:21014]                                                               | 0.54 | 0.34 | 0.66 |
| VARS2     | valyl-tRNA synthetase 2, mitochondrial [Source:HGNC Symbol;Acc:21642]                                                 | 0.32 | 0.52 | 0.64 |
| BCAS4     | breast carcinoma amplified sequence 4 [Source:HGNC Symbol;Acc:14367]                                                  | 0.18 | 0.61 | 0.73 |
| CCL8      | chemokine (C-C motif) ligand 8 [Source:HGNC Symbol;Acc:10635]                                                         | 0.69 | 0.49 | 0.8  |
| MGRPRF    | MAS-related GPR, member F [Source:HGNC Symbol;Acc:24828]                                                              | 0.82 | 0.53 | 0.93 |
| TFAP2E    | transcription factor AP-2 epsilon (activating enhancer binding protein 2 epsilon) [Source:HGNC Symbol;Acc:30774]      | 0.34 | 0.35 | 0.46 |
| NOSIP     | nitric oxide synthase interacting protein [Source:HGNC Symbol;Acc:17946]                                              | 0.35 | 0.41 | 0.52 |
| PRRG2     | proline rich Gla (G-carboxyglutamic acid) 2 [Source:HGNC Symbol;Acc:9470]                                             | 0.35 | 0.41 | 0.52 |
| DNPEP     | aspartyl aminopeptidase [Source:HGNC Symbol;Acc:2981]                                                                 | 0.45 | 0.38 | 0.56 |
| MAP6D1    | MAP6 domain containing 1 [Source:HGNC Symbol;Acc:25753]                                                               | 0.16 | 0.12 | 0.27 |
| SHFM1     | split hand/foot malformation (ectrodactyly) type 1 [Source:HGNC Symbol;Acc:10845]                                     | 0.01 | 0.01 | 0.12 |
| HEBP2     | heme binding protein 2 [Source:HGNC Symbol;Acc:15716]                                                                 | 0.05 | 0.04 | 0.16 |
| IL20      | interleukin 20 [Source:HGNC Symbol;Acc:6002]                                                                          | 0.53 | 0.53 | 0.64 |
| KRTAP4-7  | keratin associated protein 4-7 [Source:HGNC Symbol;Acc:18898]                                                         | 0.84 | 0.84 | 0.95 |
| ACAT2     | acetyl-CoA acetyltransferase 2 [Source:HGNC Symbol;Acc:94]                                                            | 0.47 | 0.46 | 0.58 |
| TC2N      | tandem C2 domains, nuclear [Source:HGNC Symbol;Acc:19859]                                                             | 0.37 | 0.36 | 0.48 |
| ZNF502    | zinc finger protein 502 [Source:HGNC Symbol;Acc:23718]                                                                | 0.53 | 0.55 | 0.66 |
| FCRL2     | Fc receptor-like 2 [Source:HGNC Symbol;Acc:14875]                                                                     | 0.86 | 0.83 | 0.97 |
| ZACN      | zinc activated ligand-gated ion channel [Source:HGNC Symbol;Acc:29504]                                                | 0.79 | 0.76 | 0.9  |
| HEXB      | hexosaminidase B (beta polypeptide) [Source:HGNC Symbol;Acc:4879]                                                     | 0.53 | 0.49 | 0.64 |
| OMD       | osteonodulin [Source:HGNC Symbol;Acc:8134]                                                                            | 0.67 | 0.63 | 0.78 |
| MT1H      | metallothionein 1H [Source:HGNC Symbol;Acc:7400]                                                                      | 0.14 | 0.19 | 0.3  |
| MAGEE1    | melanoma antigen family E, 1 [Source:HGNC Symbol;Acc:24934]                                                           | 0.34 | 0.39 | 0.5  |
| FAM174B   | family with sequence similarity 174, member B [Source:HGNC Symbol;Acc:34339]                                          | 0.72 | 0.66 | 0.83 |
| SLC11A1   | solute carrier family 11 (proton-coupled divalent metal ion transporters), member 1 [Source:HGNC Symbol;Acc:10907]    | 0.84 | 0.77 | 0.95 |
| TRIOBP    | TRIO and F-actin binding protein [Source:HGNC Symbol;Acc:17009]                                                       | 0.18 | 0.11 | 0.29 |
| TBC1D23   | TBC1 domain family, member 23 [Source:HGNC Symbol;Acc:25622]                                                          | 0.76 | 0.84 | 0.95 |
| STX1B     | syntaxin 1B [Source:HGNC Symbol;Acc:18539]                                                                            | 0.5  | 0.42 | 0.61 |
| TP53INP1  | tumor protein p53 inducible nuclear protein 1 [Source:HGNC Symbol;Acc:18022]                                          | 0.28 | 0.2  | 0.39 |
| GGT6      | gamma-glutamyltransferase 6 [Source:HGNC Symbol;Acc:26891]                                                            | 0.6  | 0.68 | 0.79 |
| PFKP      | phosphofructokinase, platelet [Source:HGNC Symbol;Acc:8878]                                                           | 0.38 | 0.28 | 0.49 |
| TSLP      | thymic stromal lymphopoietin [Source:HGNC Symbol;Acc:30743]                                                           | 0.83 | 0.72 | 0.94 |
| TMEM158   | transmembrane protein 158 (gene/pseudogene) [Source:HGNC Symbol;Acc:30293]                                            | 0.49 | 0.6  | 0.71 |
| SNRK      | SNF related kinase [Source:HGNC Symbol;Acc:30598]                                                                     | 0.38 | 0.5  | 0.61 |
| C9orf9    | chromosome 9 open reading frame 9 [Source:HGNC Symbol;Acc:1367]                                                       | 0.48 | 0.6  | 0.71 |
| LPGAT1    | lysophosphatidylglycerol acyltransferase 1 [Source:HGNC Symbol;Acc:28985]                                             | 0.13 | 0    | 0.24 |
| C19orf26  | chromosome 19 open reading frame 26 [Source:HGNC Symbol;Acc:28617]                                                    | 0.56 | 0.42 | 0.67 |
| MFSD4     | major facilitator superfamily domain containing 4 [Source:HGNC Symbol;Acc:25433]                                      | 0.79 | 0.57 | 0.9  |
| CDX4      | caudal type homeobox 4 [Source:HGNC Symbol;Acc:1808]                                                                  | 0.43 | 0.66 | 0.77 |
| PCBP4     | poly(rC) binding protein 4 [Source:HGNC Symbol;Acc:8652]                                                              | 0.31 | 0.06 | 0.42 |
| NPB       | neuropeptide B [Source:HGNC Symbol;Acc:30099]                                                                         | 0.22 | 0.49 | 0.6  |
| AKR7A3    | aldo-keto reductase family 7, member A3 (aflatoxin aldehyde reductase) [Source:HGNC Symbol;Acc:390]                   | 0.19 | 0.55 | 0.66 |
| KRTAP19-8 | keratin associated protein 19-8 [Source:HGNC Symbol;Acc:33898]                                                        | 0.83 | 0.38 | 0.94 |
| NHSL1     | NHS-like 1 [Source:HGNC Symbol;Acc:21021]                                                                             | 0.79 | 0.27 | 0.9  |
| TNNI2     | troponin I type 2 (skeletal, fast) [Source:HGNC Symbol;Acc:11946]                                                     | 0.83 | 0.81 | 0.93 |
| HRC       | histidine rich calcium binding protein [Source:HGNC Symbol;Acc:5178]                                                  | 0.8  | 0.83 | 0.93 |
| NPY5R     | neuropeptide Y receptor Y5 [Source:HGNC Symbol;Acc:7958]                                                              | 0.46 | 0.58 | 0.68 |
| PTGR1     | prostaglandin reductase 1 [Source:HGNC Symbol;Acc:18429]                                                              | 0.42 | 0.41 | 0.52 |
| MOSPD1    | motile sperm domain containing 1 [Source:HGNC Symbol;Acc:25235]                                                       | 0.22 | 0.24 | 0.34 |
| CRB2      | crumbs homolog 2 (Drosophila) [Source:HGNC Symbol;Acc:18688]                                                          | 0.45 | 0.14 | 0.55 |
| ANGPT1    | angiotensinogen 1 [Source:HGNC Symbol;Acc:484]                                                                        | 0.07 | 0.05 | 0.17 |
| PARP4     | poly (ADP-ribose) polymerase family, member 4 [Source:HGNC Symbol;Acc:271]                                            | 0.21 | 0.18 | 0.31 |
| SEMA3F    | sema domain, immunoglobulin domain (Ig), short basic domain, secreted, (semaphorin) 3F [Source:HGNC Symbol;Acc:10728] | 0.09 | 0.12 | 0.22 |
| GLUD2     | glutamate dehydrogenase 2 [Source:HGNC Symbol;Acc:4336]                                                               | 0.17 | 0.12 | 0.27 |
| FAM160B1  | family with sequence similarity 160, member B1 [Source:HGNC Symbol;Acc:29320]                                         | 0.09 | 0.03 | 0.19 |
| MRC2      | mannose receptor, C type 2 [Source:HGNC Symbol;Acc:16875]                                                             | 0.12 | 0.04 | 0.22 |
| DUOX1     | dual oxidase 1 [Source:HGNC Symbol;Acc:3062]                                                                          | 0.07 | 0.15 | 0.25 |

|           |                                                                                                                                 |      |      |      |
|-----------|---------------------------------------------------------------------------------------------------------------------------------|------|------|------|
| GCNT2     | glucosaminyl (N-acetyl) transferase 2, I-branching enzyme (I blood group)<br>[Source:HGNC Symbol;Acc:4204]                      | 0.04 | 0.16 | 0.26 |
| BCL6B     | B-cell CLL/lymphoma 6, member B [Source:HGNC Symbol;Acc:1002]                                                                   | 0.06 | 0.21 | 0.31 |
| CFTR      | cystic fibrosis transmembrane conductance regulator (ATP-binding cassette sub-family C, member 7) [Source:HGNC Symbol;Acc:1884] | 0.06 | 0.23 | 0.33 |
| NBLA00301 | RP11-471J12.1                                                                                                                   | 0.08 | 0.05 | 0.18 |
| BEST4     | bestrophin 4 [Source:HGNC Symbol;Acc:17106]                                                                                     | 0.9  | 0.9  | 1    |
| BDKRB1    | bradykinin receptor B1 [Source:HGNC Symbol;Acc:1029]                                                                            | 0.87 | 0.87 | 0.97 |
| DEF8      | differentially expressed in FDCP 8 homolog (mouse) [Source:HGNC Symbol;Acc:25969]                                               | 0.37 | 0.37 | 0.47 |
| KISS1     | KISS-1 metastasis-suppressor [Source:HGNC Symbol;Acc:6341]                                                                      | 0.84 | 0.83 | 0.94 |
| B3GNT5    | UDP-GlcNAc:betaGal beta-1,3-N-acetylglucosaminyltransferase 5 [Source:HGNC Symbol;Acc:15684]                                    | 0.77 | 0.76 | 0.87 |
| CMA1      | chymase 1, mast cell [Source:HGNC Symbol;Acc:2097]                                                                              | 0.89 | 0.9  | 1    |
| ZDHHC23   | zinc finger, DHHC-type containing 23 [Source:HGNC Symbol;Acc:28654]                                                             | 0.25 | 0.26 | 0.36 |
| IQCH      | IQ motif containing H [Source:HGNC Symbol;Acc:25721]                                                                            | 0.84 | 0.82 | 0.94 |
| C7orf34   | chromosome 7 open reading frame 34 [Source:HGNC Symbol;Acc:21750]                                                               | 0.64 | 0.62 | 0.74 |
| NALCN     | sodium leak channel, non-selective [Source:HGNC Symbol;Acc:19082]                                                               | 0.62 | 0.64 | 0.74 |
| C15orf27  | chromosome 15 open reading frame 27 [Source:HGNC Symbol;Acc:26763]                                                              | 0.24 | 0.26 | 0.36 |
| LCTL      | lactase-like [Source:HGNC Symbol;Acc:15583]                                                                                     | 0.63 | 0.65 | 0.75 |
| ADAMTSL3  | ADAMTS-like 3 [Source:HGNC Symbol;Acc:14633]                                                                                    | 0.26 | 0.28 | 0.38 |
| GPC2      | glypican 2 [Source:HGNC Symbol;Acc:4450]                                                                                        | 0.12 | 0.14 | 0.24 |
| GAS2      | growth arrest-specific 2 [Source:HGNC Symbol;Acc:4167]                                                                          | 0.66 | 0.63 | 0.76 |
| TEP1      | telomerase-associated protein 1 [Source:HGNC Symbol;Acc:11726]                                                                  | 0.34 | 0.31 | 0.44 |
| IFITM5    | interferon induced transmembrane protein 5 [Source:HGNC Symbol;Acc:16644]                                                       | 0.8  | 0.84 | 0.94 |
| ALOX15    | arachidonate 15-lipoxygenase [Source:HGNC Symbol;Acc:433]                                                                       | 0.32 | 0.28 | 0.42 |
| ELAVL4    | ELAV (embryonic lethal, abnormal vision, Drosophila)-like 4 [Source:HGNC Symbol;Acc:3315]                                       | 0.67 | 0.63 | 0.77 |
| KLF5      | Kruppel-like factor 5 (intestinal) [Source:HGNC Symbol;Acc:6349]                                                                | 0.54 | 0.49 | 0.64 |
| SLC35C1   | solute carrier family 35, member C1 [Source:HGNC Symbol;Acc:20197]                                                              | 0.9  | 0.85 | 1    |
| SP7       | Sp7 transcription factor [Source:HGNC Symbol;Acc:17321]                                                                         | 0.76 | 0.71 | 0.86 |
| C7orf65   | chromosome 7 open reading frame 65 [Source:HGNC Symbol;Acc:34432]                                                               | 0.78 | 0.72 | 0.88 |
| STARD13   | StAR-related lipid transfer (START) domain containing 13 [Source:HGNC Symbol;Acc:19164]                                         | 0.67 | 0.74 | 0.84 |
| CRYGD     | crystallin, gamma D [Source:HGNC Symbol;Acc:2411]                                                                               | 0.86 | 0.77 | 0.96 |
| SLC12A8   | solute carrier family 12 (potassium/chloride transporters), member 8<br>[Source:HGNC Symbol;Acc:15595]                          | 0.78 | 0.87 | 0.97 |
| SLC13A4   | solute carrier family 13 (sodium/sulfate symporters), member 4 [Source:HGNC Symbol;Acc:15827]                                   | 0.52 | 0.61 | 0.71 |
| GSTM2     | glutathione S-transferase mu 2 (muscle) [Source:HGNC Symbol;Acc:4634]                                                           | 0.6  | 0.72 | 0.82 |
| CD200R1   | CD200 receptor 1 [Source:HGNC Symbol;Acc:24235]                                                                                 | 0.9  | 0.77 | 1    |
| FXYS5     | FXD domain containing ion transport regulator 5 [Source:HGNC Symbol;Acc:4029]                                                   | 0.74 | 0.59 | 0.84 |
| CDH15     | cadherin 15, type 1, M-cadherin (myotubule) [Source:HGNC Symbol;Acc:1754]                                                       | 0.09 | 0.27 | 0.37 |
| FAM71F2   | family with sequence similarity 71, member F2 [Source:HGNC Symbol;Acc:27998]                                                    | 0.9  | 0.69 | 1    |
| KCNIP2    | Kv channel interacting protein 2 [Source:HGNC Symbol;Acc:15522]                                                                 | 0.4  | 0.64 | 0.74 |
| MTMR8     | myotubularin related protein 8 [Source:HGNC Symbol;Acc:16825]                                                                   | 0.67 | 0.42 | 0.77 |
| PYGO1     | pygopus homolog 1 (Drosophila) [Source:HGNC Symbol;Acc:30256]                                                                   | 0.83 | 0.84 | 0.93 |
| DCTD      | dCMP deaminase [Source:HGNC Symbol;Acc:2710]                                                                                    | 0.82 | 0.8  | 0.91 |
| S100A4    | S100 calcium binding protein A4 [Source:HGNC Symbol;Acc:10494]                                                                  | 0.59 | 0.72 | 0.81 |
| RCSD1     | RCSD domain containing 1 [Source:HGNC Symbol;Acc:28310]                                                                         | 0.42 | 0.58 | 0.67 |
| LDLRAD1   | low density lipoprotein receptor class A domain containing 1 [Source:HGNC Symbol;Acc:32069]                                     | 0.72 | 0.55 | 0.81 |
| MLC1      | megalencephalic leukoencephalopathy with subcortical cysts 1 [Source:HGNC Symbol;Acc:17082]                                     | 0.71 | 0.54 | 0.8  |
| KLHDC8A   | kelch domain containing 8A [Source:HGNC Symbol;Acc:25573]                                                                       | 0.71 | 0.25 | 0.8  |
| ZDHHC15   | zinc finger, DHHC-type containing 15 [Source:HGNC Symbol;Acc:20342]                                                             | 0.46 | 0.46 | 0.55 |
| GUCY1B3   | guanylate cyclase 1, soluble, beta 3 [Source:HGNC Symbol;Acc:4687]                                                              | 0.35 | 0.37 | 0.46 |
| WDYHV1    | WDYHV motif containing 1 [Source:HGNC Symbol;Acc:25490]                                                                         | 0.41 | 0.38 | 0.5  |
| CYHR1     | cysteine/histidine-rich 1 [Source:HGNC Symbol;Acc:17806]                                                                        | 0.41 | 0.38 | 0.5  |
| LOC554223 | histocompatibility antigen-related<br>solute carrier family 5 (iodide transporter), member 8 [Source:HGNC Symbol;Acc:19119]     | 0.33 | 0.37 | 0.46 |
| SLC5A8    | Symbol;Acc:19119                                                                                                                | 0.33 | 0.37 | 0.46 |
| EPHA8     | EPH receptor A8 [Source:HGNC Symbol;Acc:3391]                                                                                   | 0.19 | 0.14 | 0.28 |
| KIF21B    | kinesin family member 21B [Source:HGNC Symbol;Acc:29442]                                                                        | 0.3  | 0.24 | 0.39 |
| DUSP9     | dual specificity phosphatase 9 [Source:HGNC Symbol;Acc:3076]                                                                    | 0.46 | 0.21 | 0.55 |
| CDHR2     | cadherin-related family member 2 [Source:HGNC Symbol;Acc:18231]                                                                 | 0.04 | 0.08 | 0.17 |
| IFFO1     | intermediate filament family orphan 1 [Source:HGNC Symbol;Acc:24970]                                                            | 0.08 | 0.01 | 0.17 |
| EML2      | echinoderm microtubule associated protein like 2 [Source:HGNC Symbol;Acc:18035]                                                 | 0.02 | 0.02 | 0.11 |
| IRF2BP1   | interferon regulatory factor 2 binding protein 1 [Source:HGNC Symbol;Acc:21728]                                                 | 0    | 0    | 0.09 |
| BOK       | BCL2-related ovarian killer [Source:HGNC Symbol;Acc:1087]                                                                       | 0.02 | 0.02 | 0.11 |
| CXCL2     | chemokine (C-X-C motif) ligand 2 [Source:HGNC Symbol;Acc:4603]                                                                  | 0.05 | 0.06 | 0.15 |
| CKAP2     | cytoskeleton associated protein 2 [Source:HGNC Symbol;Acc:1990]                                                                 | 0.02 | 0.01 | 0.11 |

|          |                                                                                        |      |      |      |
|----------|----------------------------------------------------------------------------------------|------|------|------|
| OTX2     | orthodenticle homeobox 2 [Source:HGNC Symbol;Acc:8522]                                 | 0.01 | 0.02 | 0.11 |
| COL4A1   | collagen, type IV, alpha 1 [Source:HGNC Symbol;Acc:2202]                               | 0.09 | 0.07 | 0.18 |
| COL4A2   | collagen, type IV, alpha 2 [Source:HGNC Symbol;Acc:2203]                               | 0.09 | 0.07 | 0.18 |
| ZNF672   | zinc finger protein 672 [Source:HGNC Symbol;Acc:26179]                                 | 0.09 | 0.07 | 0.18 |
| PRSS35   | protease, serine, 35 [Source:HGNC Symbol;Acc:21387]                                    | 0    | 0.02 | 0.11 |
| RFTN2    | raftlin family member 2 [Source:HGNC Symbol;Acc:26402]                                 | 0.21 | 0.23 | 0.32 |
| SH3GLB1  | SH3-domain GRB2-like endophilin B1 [Source:HGNC Symbol;Acc:10833]                      | 0.12 | 0.15 | 0.24 |
| CYR61    | cysteine-rich, angiogenic inducer, 61 [Source:HGNC Symbol;Acc:2654]                    | 0.03 | 0.07 | 0.16 |
| PPP2R3A  | protein phosphatase 2, regulatory subunit B", alpha [Source:HGNC Symbol;Acc:9307]      | 0.15 | 0.1  | 0.24 |
| DUOXA1   | dual oxidase maturation factor 1 [Source:HGNC Symbol;Acc:26507]                        | 0.13 | 0.23 | 0.32 |
| CHIT1    | chitinase 1 (chitotriosidase) [Source:HGNC Symbol;Acc:1936]                            | 0.87 | 0.87 | 0.96 |
| C1orf100 | chromosome 1 open reading frame 100 [Source:HGNC Symbol;Acc:30435]                     | 0.78 | 0.78 | 0.87 |
| TMEM132A | transmembrane protein 132A [Source:HGNC Symbol;Acc:31092]                              | 0.79 | 0.79 | 0.88 |
| LAMP2    | lysosomal-associated membrane protein 2 [Source:HGNC Symbol;Acc:6501]                  | 0.38 | 0.38 | 0.47 |
| FAM123B  | APC membrane recruitment protein 1 [Source:HGNC Symbol;Acc:26837]                      | 0.33 | 0.33 | 0.42 |
| DPT      | dermatopontin [Source:HGNC Symbol;Acc:3011]                                            | 0.91 | 0.9  | 1    |
| DNAJB8   | DnaJ (Hsp40) homolog, subfamily B, member 8 [Source:HGNC Symbol;Acc:23699]             | 0.75 | 0.74 | 0.84 |
| LYL1     | lymphoblastic leukemia derived sequence 1 [Source:HGNC Symbol;Acc:6734]                | 0.67 | 0.68 | 0.77 |
| CCDC152  | coiled-coil domain containing 152 [Source:HGNC Symbol;Acc:34438]                       | 0.53 | 0.54 | 0.63 |
| MAL2     | mal, T-cell differentiation protein 2 (gene/pseudogene) [Source:HGNC Symbol;Acc:13634] | 0.66 | 0.67 | 0.76 |
| SYT14    | synaptotagmin XIV [Source:HGNC Symbol;Acc:23143]                                       | 0.39 | 0.37 | 0.48 |
| KRT73    | keratin 73 [Source:HGNC Symbol;Acc:28928]                                              | 0.85 | 0.83 | 0.94 |
| CYP1A2   | cytochrome P450, family 1, subfamily A, polypeptide 2 [Source:HGNC Symbol;Acc:2596]    | 0.87 | 0.85 | 0.96 |
| NRBF2    | nuclear receptor binding factor 2 [Source:HGNC Symbol;Acc:19692]                       | 0.62 | 0.64 | 0.73 |
| MMP10    | matrix metalloproteinase 10 (stromelysin 2) [Source:HGNC Symbol;Acc:7156]              | 0.86 | 0.83 | 0.95 |
| RHBDL2   | rhomboid, veinlet-like 2 (Drosophila) [Source:HGNC Symbol;Acc:16083]                   | 0.75 | 0.72 | 0.84 |
| PDZK1IP1 | PDZK1 interacting protein 1 [Source:HGNC Symbol;Acc:16887]                             | 0.81 | 0.78 | 0.9  |
| TLL10    | tubulin tyrosine ligase-like family, member 10 [Source:HGNC Symbol;Acc:26693]          | 0.27 | 0.24 | 0.36 |
| SEMG1    | semenogelin 1 [Source:HGNC Symbol;Acc:10742]                                           | 0.86 | 0.83 | 0.95 |
| CTL4     | cytotoxic T-lymphocyte-associated protein 4 [Source:HGNC Symbol;Acc:2505]              | 0.88 | 0.91 | 1    |
| RNF133   | ring finger protein 133 [Source:HGNC Symbol;Acc:21154]                                 | 0.87 | 0.9  | 0.99 |
| LTB      | lymphotoxin beta (TNF superfamily, member 3) [Source:HGNC Symbol;Acc:6711]             | 0.85 | 0.81 | 0.94 |
| PXDNL    | peroxidasin homolog (Drosophila)-like [Source:HGNC Symbol;Acc:26359]                   | 0.56 | 0.6  | 0.69 |
| ACOT9    | acyl-CoA thioesterase 9 [Source:HGNC Symbol;Acc:17152]                                 | 0.49 | 0.45 | 0.58 |
| CSK      | c-src tyrosine kinase [Source:HGNC Symbol;Acc:2444]                                    | 0.22 | 0.26 | 0.35 |
| APEX2    | APEX nuclease (apurinic/apyrimidinic endonuclease) 2 [Source:HGNC Symbol;Acc:17889]    | 0.39 | 0.35 | 0.48 |
| GEMIN4   | gem (nuclear organelle) associated protein 4 [Source:HGNC Symbol;Acc:15717]            | 0.69 | 0.73 | 0.82 |
| PIN1     | peptidylprolyl cis/trans isomerase, NIMA-interacting 1 [Source:HGNC Symbol;Acc:8988]   | 0.82 | 0.86 | 0.95 |
| GTF2A1L  | general transcription factor IIA, 1-like [Source:HGNC Symbol;Acc:30727]                | 0.7  | 0.74 | 0.83 |
| MT1B     | metallothionein 1B [Source:HGNC Symbol;Acc:7394]                                       | 0.86 | 0.81 | 0.95 |
| PLS3     | plastin 3 [Source:HGNC Symbol;Acc:9091]                                                | 0.52 | 0.47 | 0.61 |
| TNS4     | tensin 4 [Source:HGNC Symbol;Acc:24352]                                                | 0.7  | 0.75 | 0.84 |
| IL13RA1  | interleukin 13 receptor, alpha 1 [Source:HGNC Symbol;Acc:5974]                         | 0.62 | 0.56 | 0.71 |
| TMSB15B  | thymosin beta 15B [Source:HGNC Symbol;Acc:28612]                                       | 0.49 | 0.43 | 0.58 |
| CXCL6    | chemokine (C-X-C motif) ligand 6 [Source:HGNC Symbol;Acc:10643]                        | 0.42 | 0.48 | 0.57 |
| SSTR4    | somatostatin receptor 4 [Source:HGNC Symbol;Acc:11333]                                 | 0.81 | 0.75 | 0.9  |
| DUSP28   | dual specificity phosphatase 28 [Source:HGNC Symbol;Acc:33237]                         | 0.7  | 0.76 | 0.85 |
| OXT      | oxytocin/neurophysin 1 prepropeptide [Source:HGNC Symbol;Acc:8528]                     | 0.85 | 0.91 | 1    |
| PLEK     | pleckstrin [Source:HGNC Symbol;Acc:9070]                                               | 0.88 | 0.8  | 0.97 |
| GSTK1    | glutathione S-transferase kappa 1 [Source:HGNC Symbol;Acc:16906]                       | 0.62 | 0.53 | 0.71 |
| RASAL1   | RAS protein activator like 1 (GAP1 like) [Source:HGNC Symbol;Acc:9873]                 | 0.11 | 0.2  | 0.29 |
| ENPP3    | ectonucleotide pyrophosphatase/phosphodiesterase 3 [Source:HGNC Symbol;Acc:3358]       | 0.81 | 0.72 | 0.9  |
| THY1     | Thy-1 cell surface antigen [Source:HGNC Symbol;Acc:11801]                              | 0.55 | 0.65 | 0.74 |
| DNM1P35  | DNM1 pseudogene 35 [Source:HGNC Symbol;Acc:35182]                                      | 0.91 | 0.8  | 1    |
| DEFB132  | defensin, beta 132 [Source:HGNC Symbol;Acc:33806]                                      | 0.62 | 0.51 | 0.71 |
| SLC44A2  | solute carrier family 44, member 2 [Source:HGNC Symbol;Acc:17292]                      | 0.38 | 0.23 | 0.47 |
| SLC19A1  | solute carrier family 19 (folate transporter), member 1 [Source:HGNC Symbol;Acc:10937] | 0.52 | 0.32 | 0.61 |
| AZ11     | 5-azacytidine induced 1 [Source:HGNC Symbol;Acc:29511]                                 | 0.77 | 0.57 | 0.86 |
| ABCA6    | ATP-binding cassette, sub-family A (ABC1), member 6 [Source:HGNC Symbol;Acc:36]        | 0.71 | 0.91 | 1    |
| IL8      | interleukin 8 [Source:HGNC Symbol;Acc:6025]                                            | 0.91 | 0.7  | 1    |
| CNTN5    | contactin 5 [Source:HGNC Symbol;Acc:2175]                                              | 0.32 | 0.09 | 0.41 |
| ZFP42    | ZFP42 zinc finger protein [Source:HGNC Symbol;Acc:30949]                               | 0.41 | 0.76 | 0.85 |
| IL17B    | interleukin 17B [Source:HGNC Symbol;Acc:5982]                                          | 0.85 | 0.44 | 0.94 |
| DSG3     | desmoglein 3 [Source:HGNC Symbol;Acc:3050]                                             | 0.85 | 0.85 | 0.93 |
| TMEM63C  | transmembrane protein 63C [Source:HGNC Symbol;Acc:23787]                               | 0.47 | 0.46 | 0.55 |

|           |                                                                                                                                         |      |      |      |
|-----------|-----------------------------------------------------------------------------------------------------------------------------------------|------|------|------|
| CD34      | CD34 molecule [Source:HGNC Symbol;Acc:1662]                                                                                             | 0.46 | 0.48 | 0.56 |
| IKZF3     | IKAROS family zinc finger 3 (Aiolos) [Source:HGNC Symbol;Acc:13178]                                                                     | 0.6  | 0.58 | 0.68 |
| C19orf35  | chromosome 19 open reading frame 35 [Source:HGNC Symbol;Acc:24793]                                                                      | 0.85 | 0.83 | 0.93 |
| BOLL      | bol, boule-like (Drosophila) [Source:HGNC Symbol;Acc:14273]                                                                             | 0.69 | 0.71 | 0.79 |
| ARRB2     | arrestin, beta 2 [Source:HGNC Symbol;Acc:712]                                                                                           | 0.56 | 0.59 | 0.67 |
| TAS2R60   | taste receptor, type 2, member 60 [Source:HGNC Symbol;Acc:20639]                                                                        | 0.79 | 0.82 | 0.9  |
| TBX10     | T-box 10 [Source:HGNC Symbol;Acc:11593]                                                                                                 | 0.58 | 0.54 | 0.66 |
| LMO3      | LIM domain only 3 (rhombotin-like 2) [Source:HGNC Symbol;Acc:6643]                                                                      | 0.53 | 0.57 | 0.65 |
|           | phytanoyl-CoA 2-hydroxylase interacting protein [Source:HGNC Symbol;Acc:16865]                                                          | 0.55 | 0.6  | 0.68 |
| PHYHIP    |                                                                                                                                         |      |      |      |
| SYCP1     | synaptonemal complex protein 1 [Source:HGNC Symbol;Acc:11487]                                                                           | 0.52 | 0.58 | 0.66 |
| C22orf32  | chromosome 22 open reading frame 32 [Source:HGNC Symbol;Acc:25055]                                                                      | 0.6  | 0.53 | 0.68 |
| ZBTB4     | zinc finger and BTB domain containing 4 [Source:HGNC Symbol;Acc:23847]                                                                  | 0.82 | 0.73 | 0.9  |
| GLT25D2   | glycosyltransferase 25 domain containing 2 [Source:HGNC Symbol;Acc:16790]                                                               | 0.73 | 0.61 | 0.81 |
|           | solute carrier family 34 (sodium phosphate), member 3 [Source:HGNC Symbol;Acc:20305]                                                    | 0.82 | 0.7  | 0.9  |
| SLC34A3   |                                                                                                                                         |      |      |      |
| TIAM2     | T-cell lymphoma invasion and metastasis 2 [Source:HGNC Symbol;Acc:11806]                                                                | 0.6  | 0.47 | 0.68 |
| RAB17     | RAB17, member RAS oncogene family [Source:HGNC Symbol;Acc:16523]                                                                        | 0.45 | 0.59 | 0.67 |
| CD1D      | CD1d molecule [Source:HGNC Symbol;Acc:1637]                                                                                             | 0.53 | 0.7  | 0.78 |
| VSIG8     | chromosome 1 open reading frame 204 [Source:HGNC Symbol;Acc:27647]                                                                      | 0.82 | 0.55 | 0.9  |
|           | CMT duplicated region transcript 1; Uncharacterized protein [Source:UniProtKB/TrEMBL;Acc:Q98XD7]                                        | 0.58 | 0.24 | 0.66 |
| CDRT1     |                                                                                                                                         |      |      |      |
| ZC3HAV1L  | zinc finger CCHH-type, antiviral 1-like [Source:HGNC Symbol;Acc:22423]                                                                  | 0.37 | 0.73 | 0.81 |
| TLX1      | T-cell leukemia homeobox 1 [Source:HGNC Symbol;Acc:5056]                                                                                | 0.32 | 0.32 | 0.4  |
| TLX1NB    | TLX1 neighbor [Source:HGNC Symbol;Acc:37183]                                                                                            | 0.32 | 0.32 | 0.4  |
| FRMD4A    | FERM domain containing 4A [Source:HGNC Symbol;Acc:25491]                                                                                | 0.41 | 0.41 | 0.49 |
|           | nuclear factor of kappa light polypeptide gene enhancer in B-cells inhibitor, zeta [Source:HGNC Symbol;Acc:29805]                       | 0.17 | 0.18 | 0.26 |
| NFKBIZ    |                                                                                                                                         |      |      |      |
| FNIP2     | folliculin interacting protein 2 [Source:HGNC Symbol;Acc:29280]                                                                         | 0.31 | 0.32 | 0.4  |
| TMEM164   | transmembrane protein 164 [Source:HGNC Symbol;Acc:26217]                                                                                | 0.41 | 0.43 | 0.51 |
| RARA      | retinoic acid receptor, alpha [Source:HGNC Symbol;Acc:9864]                                                                             | 0.03 | 0.06 | 0.14 |
| ABHD14A   | abhydrolase domain containing 14A [Source:HGNC Symbol;Acc:24538]                                                                        | 0.09 | 0.06 | 0.17 |
|           | Usher syndrome 1C (autosomal recessive, severe) [Source:HGNC Symbol;Acc:12597]                                                          | 0.17 | 0.2  | 0.28 |
| USH1C     |                                                                                                                                         |      |      |      |
| LPAR1     | lysophosphatidic acid receptor 1 [Source:HGNC Symbol;Acc:3166]                                                                          | 0.15 | 0.18 | 0.26 |
| RESP18    | regulated endocrine-specific protein 18 [Source:HGNC Symbol;Acc:33762]                                                                  | 0.12 | 0.08 | 0.2  |
| A4GALT    | alpha 1,4-galactosyltransferase [Source:HGNC Symbol;Acc:18149]                                                                          | 0.02 | 0.06 | 0.14 |
| ASS1      | argininosuccinate synthase 1 [Source:HGNC Symbol;Acc:758]                                                                               | 0.41 | 0.46 | 0.54 |
|           | NADH dehydrogenase (ubiquinone) flavoprotein 3, 10kDa [Source:HGNC Symbol;Acc:7719]                                                     | 0.12 | 0.03 | 0.2  |
| NDUFV3    |                                                                                                                                         |      |      |      |
| LDHC      | lactate dehydrogenase C [Source:HGNC Symbol;Acc:6544]                                                                                   | 0.19 | 0.29 | 0.37 |
| PDE4B     | phosphodiesterase 4B, cAMP-specific [Source:HGNC Symbol;Acc:8781]                                                                       | 0.19 | 0.08 | 0.27 |
| CLEC14A   | C-type lectin domain family 14, member A [Source:HGNC Symbol;Acc:19832]                                                                 | 0.12 | 0.25 | 0.33 |
| CELF3     | CUGBP, Elav-like family member 3 [Source:HGNC Symbol;Acc:11967]                                                                         | 0.32 | 0.11 | 0.4  |
| LINS4     | lin-54 homolog (C. elegans) [Source:HGNC Symbol;Acc:25397]                                                                              | 0.02 | 0    | 0.1  |
| FBXL14    | F-box and leucine-rich repeat protein 14 [Source:HGNC Symbol;Acc:28624]                                                                 | 0.11 | 0.07 | 0.19 |
| MPDU1     | mannose-P-dolichol utilization defect 1 [Source:HGNC Symbol;Acc:7207]                                                                   | 0.2  | 0.22 | 0.3  |
| EFHD2     | EF-hand domain family, member D2 [Source:HGNC Symbol;Acc:28670]                                                                         | 0.13 | 0.11 | 0.21 |
| TMEM179   | transmembrane protein 179 [Source:HGNC Symbol;Acc:20137]                                                                                | 0.23 | 0.16 | 0.31 |
| NTAN1     | N-terminal asparagine amidase [Source:HGNC Symbol;Acc:29909]                                                                            | 0.17 | 0.07 | 0.25 |
| NME3      | NME/NM23 nucleoside diphosphate kinase 3 [Source:HGNC Symbol;Acc:7851]                                                                  | 0.06 | 0.16 | 0.24 |
| HEPH      | hephaestin [Source:HGNC Symbol;Acc:4866]                                                                                                | 0.33 | 0.33 | 0.41 |
| NMUR1     | neuromedin U receptor 1 [Source:HGNC Symbol;Acc:4518]                                                                                   | 0.56 | 0.56 | 0.64 |
| ITLN2     | intelectin 2 [Source:HGNC Symbol;Acc:20599]                                                                                             | 0.91 | 0.9  | 0.99 |
| C20orf152 | N/A                                                                                                                                     | 0.79 | 0.78 | 0.87 |
|           | amine oxidase, copper containing 3 (vascular adhesion protein 1) [Source:HGNC Symbol;Acc:550]                                           | 0.85 | 0.86 | 0.94 |
| AOC3      |                                                                                                                                         |      |      |      |
| GFRA4     | GDNF family receptor alpha 4 [Source:HGNC Symbol;Acc:13821]                                                                             | 0.61 | 0.62 | 0.7  |
|           | UDP glucuronosyltransferase 2 family, polypeptide A3 [Source:HGNC Symbol;Acc:28528]                                                     | 0.85 | 0.86 | 0.94 |
| UGT2A3    |                                                                                                                                         |      |      |      |
|           | protein tyrosine phosphatase, receptor type, f polypeptide (PTPRF), interacting protein (liprin), alpha 4 [Source:HGNC Symbol;Acc:9248] | 0.9  | 0.88 | 0.98 |
| PPFIA4    |                                                                                                                                         |      |      |      |
| LMO1      | LIM domain only 1 (rhombotin 1) [Source:HGNC Symbol;Acc:6641]                                                                           | 0.63 | 0.61 | 0.71 |
| LRRC33    | leucine rich repeat containing 33 [Source:HGNC Symbol;Acc:24613]                                                                        | 0.66 | 0.64 | 0.74 |
|           | RGD motif, leucine rich repeats, tropomodulin domain and proline-rich containing [Source:HGNC Symbol;Acc:27089]                         | 0.9  | 0.92 | 1    |
| RLTPR     |                                                                                                                                         |      |      |      |
| IRF8      | interferon regulatory factor 8 [Source:HGNC Symbol;Acc:5358]                                                                            | 0.59 | 0.61 | 0.69 |
| NEB       | nebulin [Source:HGNC Symbol;Acc:7720]                                                                                                   | 0.86 | 0.88 | 0.96 |
| MYL7      | myosin, light chain 7, regulatory [Source:HGNC Symbol;Acc:21719]                                                                        | 0.87 | 0.9  | 0.98 |
| COL6A3    | collagen, type VI, alpha 3 [Source:HGNC Symbol;Acc:2213]                                                                                | 0.89 | 0.86 | 0.97 |
| RGAG4     | retrotransposon gag domain containing 4 [Source:HGNC Symbol;Acc:29430]                                                                  | 0.56 | 0.53 | 0.64 |
| RORC      | RAR-related orphan receptor C [Source:HGNC Symbol;Acc:10260]                                                                            | 0.52 | 0.55 | 0.63 |
|           | transient receptor potential cation channel, subfamily V, member 2 [Source:HGNC Symbol;Acc:18082]                                       | 0.62 | 0.65 | 0.73 |
| TRPV2     |                                                                                                                                         |      |      |      |
| SCN5A     | sodium channel, voltage-gated, type V, alpha subunit [Source:HGNC Symbol;Acc:10593]                                                     | 0.61 | 0.65 | 0.73 |



|           |                                                                                                          |      |      |      |
|-----------|----------------------------------------------------------------------------------------------------------|------|------|------|
| C1R       | complement component 1, r subcomponent [Source:HGNC Symbol;Acc:1246]                                     | 0.78 | 0.74 | 0.86 |
| AAGAB     | alpha- and gamma-adaptin binding protein [Source:HGNC Symbol;Acc:25662]                                  | 0.88 | 0.92 | 1    |
| OGT       | O-linked N-acetylglucosamine (GlcNAc) transferase [Source:HGNC Symbol;Acc:8127]                          | 0.51 | 0.46 | 0.59 |
| TSPO      | translocator protein (18kDa) [Source:HGNC Symbol;Acc:1158]                                               | 0.34 | 0.39 | 0.47 |
| DOK3      | docking protein 3 [Source:HGNC Symbol;Acc:24583]                                                         | 0.89 | 0.84 | 0.97 |
| RSPO4     | R-spondin 4 [Source:HGNC Symbol;Acc:16175]                                                               | 0.63 | 0.68 | 0.76 |
| SNAPC1    | small nuclear RNA activating complex, polypeptide 1, 43kDa [Source:HGNC Symbol;Acc:11134]                | 0.51 | 0.45 | 0.59 |
| CSTA      | cystatin A (stefin A) [Source:HGNC Symbol;Acc:2481]                                                      | 0.86 | 0.92 | 1    |
| TNFSF8    | tumor necrosis factor (ligand) superfamily, member 8 [Source:HGNC Symbol;Acc:11938]                      | 0.74 | 0.8  | 0.88 |
| GAL       | galanin/GMAP prepropeptide [Source:HGNC Symbol;Acc:4114]                                                 | 0.43 | 0.5  | 0.58 |
| ALX3      | ALX homeobox 3 [Source:HGNC Symbol;Acc:449]                                                              | 0.79 | 0.71 | 0.87 |
| CHRNA2    | cholinergic receptor, nicotinic, alpha 2 (neuronal) [Source:HGNC Symbol;Acc:1956]                        | 0.66 | 0.58 | 0.74 |
| SNX32     | sorting nexin 32 [Source:HGNC Symbol;Acc:26423]                                                          | 0.47 | 0.55 | 0.63 |
| ADCY9     | adenylate cyclase 9 [Source:HGNC Symbol;Acc:240]                                                         | 0.57 | 0.65 | 0.73 |
| CSMD1     | CUB and Sushi multiple domains 1 [Source:HGNC Symbol;Acc:14026]                                          | 0.77 | 0.68 | 0.85 |
| PHOSPHO1  | phosphatase, orphan 1 [Source:HGNC Symbol;Acc:16815]                                                     | 0.52 | 0.43 | 0.6  |
| SLC47A1   | solute carrier family 47, member 1 [Source:HGNC Symbol;Acc:25588]                                        | 0.28 | 0.19 | 0.36 |
| LOC150568 | uncharacterized                                                                                          | 0.3  | 0.4  | 0.48 |
| C3orf72   | chromosome 3 open reading frame 72 [Source:HGNC Symbol;Acc:34428]                                        | 0.3  | 0.4  | 0.48 |
| FOXL2     | forkhead box L2 [Source:HGNC Symbol;Acc:1092]                                                            | 0.3  | 0.4  | 0.48 |
| C7        | complement component 7 [Source:HGNC Symbol;Acc:1346]                                                     | 0.8  | 0.92 | 1    |
| UPB1      | ureidopropionase, beta [Source:HGNC Symbol;Acc:16297]                                                    | 0.4  | 0.52 | 0.6  |
| ENPP4     | ectonucleotide pyrophosphatase/phosphodiesterase 4 (putative) [Source:HGNC Symbol;Acc:3359]              | 0.27 | 0.14 | 0.35 |
| ZMYM3     | zinc finger, MYM-type 3 [Source:HGNC Symbol;Acc:13054]                                                   | 0.56 | 0.42 | 0.64 |
| KAT2A     | K(lysine) acetyltransferase 2A [Source:HGNC Symbol;Acc:4201]                                             | 0.88 | 0.71 | 0.96 |
| AQPEP     | Aminopeptidase Q [Source:UniProtKB/Swiss-Prot;Acc:Q6Q4G3]                                                | 0.44 | 0.62 | 0.7  |
| ASPA      | aspartoacylase [Source:HGNC Symbol;Acc:756]                                                              | 0.87 | 0.68 | 0.95 |
| DNAH1     | dynein, axonemal, heavy chain 1 [Source:HGNC Symbol;Acc:2940]                                            | 0.77 | 0.58 | 0.85 |
| GNRH1     | gonadotropin-releasing hormone 1 (luteinizing-releasing hormone) [Source:HGNC Symbol;Acc:4419]           | 0.7  | 0.92 | 1    |
| SCG2      | secretogranin II [Source:HGNC Symbol;Acc:10575]                                                          | 0.5  | 0.14 | 0.58 |
| GRIK5     | glutamate receptor, ionotropic, kainate 5 [Source:HGNC Symbol;Acc:4583]                                  | 0.68 | 0.29 | 0.76 |
| TRANK1    | tetratricopeptide repeat and ankyrin repeat containing 1 [Source:HGNC Symbol;Acc:29011]                  | 0.11 | 0.51 | 0.59 |
| RGMA      | RGM domain family, member A [Source:HGNC Symbol;Acc:30308]                                               | 0.9  | 0.33 | 0.98 |
| ZBTB44    | zinc finger and BTB domain containing 44 [Source:HGNC Symbol;Acc:25001]                                  | 0.83 | 0.83 | 0.9  |
| RNF40     | ring finger protein 40, E3 ubiquitin protein ligase [Source:HGNC Symbol;Acc:16867]                       | 0.86 | 0.86 | 0.93 |
| CLEC5A    | C-type lectin domain family 5, member A [Source:HGNC Symbol;Acc:2054]                                    | 0.82 | 0.82 | 0.89 |
| GYS2      | glycogen synthase 2 (liver) [Source:HGNC Symbol;Acc:4707]                                                | 0.7  | 0.69 | 0.77 |
| HLHA2     | HERV-H LTR-associating 2 [Source:HGNC Symbol;Acc:4905]                                                   | 0.85 | 0.84 | 0.92 |
| CCL28     | chemokine (C-C motif) ligand 28 [Source:HGNC Symbol;Acc:17700]                                           | 0.84 | 0.83 | 0.91 |
| C6orf10   | chromosome 6 open reading frame 10 [Source:HGNC Symbol;Acc:13922]                                        | 0.84 | 0.83 | 0.91 |
| GIPC2     | GIPC PDZ domain containing family, member 2 [Source:HGNC Symbol;Acc:18177]                               | 0.84 | 0.85 | 0.92 |
| C11orf68  | chromosome 11 open reading frame 68 [Source:HGNC Symbol;Acc:28801]                                       | 0.85 | 0.86 | 0.93 |
| SFTPB     | surfactant protein B [Source:HGNC Symbol;Acc:10801]                                                      | 0.85 | 0.86 | 0.93 |
| FAM165B   | small integral membrane protein 11 [Source:HGNC Symbol;Acc:1293]                                         | 0.82 | 0.83 | 0.9  |
| ZNF773    | zinc finger protein 773 [Source:HGNC Symbol;Acc:30487]                                                   | 0.81 | 0.83 | 0.9  |
| CLEC9A    | C-type lectin domain family 9, member A [Source:HGNC Symbol;Acc:26705]                                   | 0.83 | 0.85 | 0.92 |
| ABP1      | amiloride binding protein 1 (amine oxidase (copper-containing)) [Source:HGNC Symbol;Acc:80]              | 0.83 | 0.8  | 0.9  |
| COL20A1   | collagen, type XX, alpha 1 [Source:HGNC Symbol;Acc:14670]                                                | 0.8  | 0.83 | 0.9  |
| FAM120C   | family with sequence similarity 120C [Source:HGNC Symbol;Acc:16949]                                      | 0.48 | 0.45 | 0.55 |
| BZRAP1    | benzodiazapine receptor (peripheral) associated protein 1 [Source:HGNC Symbol;Acc:16831]                 | 0.72 | 0.69 | 0.79 |
| MAP2K4    | mitogen-activated protein kinase kinase 4 [Source:HGNC Symbol;Acc:6844]                                  | 0.58 | 0.61 | 0.68 |
| C10orf108 | proline rich 26 [Source:HGNC Symbol;Acc:30724]                                                           | 0.81 | 0.86 | 0.93 |
| MYEOV     | myeloma overexpressed (in a subset of t(11;14) positive multiple myelomas) [Source:HGNC Symbol;Acc:7563] | 0.77 | 0.82 | 0.89 |
| CD300E    | CD300e molecule [Source:HGNC Symbol;Acc:28874]                                                           | 0.83 | 0.76 | 0.9  |
| GNA14     | guanine nucleotide binding protein (G protein), alpha 14 [Source:HGNC Symbol;Acc:4382]                   | 0.66 | 0.73 | 0.8  |
| PPM1M     | protein phosphatase, Mg2+/Mn2+ dependent, 1M [Source:HGNC Symbol;Acc:26506]                              | 0.75 | 0.83 | 0.9  |
| MTA1      | metastasis associated 1 [Source:HGNC Symbol;Acc:7410]                                                    | 0.83 | 0.71 | 0.9  |
| VAMP1     | vesicle-associated membrane protein 1 (synaptobrevin 1) [Source:HGNC Symbol;Acc:12642]                   | 0.74 | 0.61 | 0.81 |
| KRTAP10-4 | keratin associated protein 10-4 [Source:HGNC Symbol;Acc:20521]                                           | 0.83 | 0.69 | 0.9  |
| CAMK1     | calcium/calmodulin-dependent protein kinase I [Source:HGNC Symbol;Acc:1459]                              | 0.42 | 0.58 | 0.65 |

|          |                                                                                                                        |      |      |      |
|----------|------------------------------------------------------------------------------------------------------------------------|------|------|------|
| SVOP     | SV2 related protein homolog (rat) [Source:HGNC Symbol;Acc:25417]                                                       | 0.85 | 0.67 | 0.92 |
| CD36     | CD36 molecule (thrombospondin receptor) [Source:HGNC Symbol;Acc:1663]                                                  | 0.86 | 0.66 | 0.93 |
| CTHRC1   | collagen triple helix repeat containing 1 [Source:HGNC Symbol;Acc:18831]                                               | 0.85 | 0.6  | 0.92 |
| ATP9A    | ATPase, class II, type 9A [Source:HGNC Symbol;Acc:13540]                                                               | 0.72 | 0.45 | 0.79 |
| HOXC13   | homeobox C13 [Source:HGNC Symbol;Acc:5125]                                                                             | 0.13 | 0.13 | 0.2  |
| ARPC2    | actin related protein 2/3 complex, subunit 2, 34kDa [Source:HGNC Symbol;Acc:705]                                       | 0    | 0    | 0.07 |
| NFE2L2   | nuclear factor (erythroid-derived 2)-like 2 [Source:HGNC Symbol;Acc:7782]                                              | 0    | 0    | 0.07 |
| CLVS1    | clavesin 1 [Source:HGNC Symbol;Acc:23139]                                                                              | 0.01 | 0.01 | 0.08 |
| C1QTNF2  | C1q and tumor necrosis factor related protein 2 [Source:HGNC Symbol;Acc:14325]                                         | 0.28 | 0.29 | 0.36 |
| C3orf70  | chromosome 3 open reading frame 70 [Source:HGNC Symbol;Acc:33731]                                                      | 0.01 | 0    | 0.08 |
| MSH5     | mutS homolog 5 (E. coli) [Source:HGNC Symbol;Acc:7328]                                                                 | 0.04 | 0.03 | 0.11 |
| IZUMO1   | izumo sperm-egg fusion 1 [Source:HGNC Symbol;Acc:28539]                                                                | 0.03 | 0.04 | 0.11 |
| ST3GAL3  | ST3 beta-galactoside alpha-2,3-sialyltransferase 3 [Source:HGNC Symbol;Acc:10866]                                      | 0.16 | 0.15 | 0.23 |
| FJX1     | four jointed box 1 (Drosophila) [Source:HGNC Symbol;Acc:17166]                                                         | 0.27 | 0.26 | 0.34 |
| C3orf37  | chromosome 3 open reading frame 37 [Source:HGNC Symbol;Acc:24446]                                                      | 0.39 | 0.38 | 0.46 |
| ANGPTL2  | angiopoietin-like 2 [Source:HGNC Symbol;Acc:490]                                                                       | 0.06 | 0.07 | 0.14 |
| IL23A    | interleukin 23, alpha subunit p19 [Source:HGNC Symbol;Acc:15488]                                                       | 0.41 | 0.39 | 0.48 |
| TUBGCP5  | tubulin, gamma complex associated protein 5 [Source:HGNC Symbol;Acc:18600]                                             | 0.06 | 0.04 | 0.13 |
| SLC26A5  | solute carrier family 26, member 5 (prestin) [Source:HGNC Symbol;Acc:9359]                                             | 0.15 | 0.13 | 0.22 |
| GPR19    | G protein-coupled receptor 19 [Source:HGNC Symbol;Acc:4473]                                                            | 0.27 | 0.3  | 0.37 |
| SYTL4    | synaptotagmin-like 4 [Source:HGNC Symbol;Acc:15588]                                                                    | 0.4  | 0.43 | 0.5  |
| ALDH1A2  | aldehyde dehydrogenase 1 family, member A2 [Source:HGNC Symbol;Acc:15472]                                              | 0.13 | 0.1  | 0.2  |
| NFKB1    | nuclear factor of kappa light polypeptide gene enhancer in B-cells 1 [Source:HGNC Symbol;Acc:7794]                     | 0.06 | 0.03 | 0.13 |
| METTL7B  | methyltransferase like 7B [Source:HGNC Symbol;Acc:28276]                                                               | 0.16 | 0.19 | 0.26 |
| CXCL14   | chemokine (C-X-C motif) ligand 14 [Source:HGNC Symbol;Acc:10640]                                                       | 0.04 | 0.07 | 0.14 |
| GFI1B    | growth factor independent 1B transcription repressor [Source:HGNC Symbol;Acc:4238]                                     | 0.22 | 0.25 | 0.32 |
| PPDPF    | pancreatic progenitor cell differentiation and proliferation factor homolog (zebrafish) [Source:HGNC Symbol;Acc:16142] | 0.32 | 0.36 | 0.43 |
| ADH1B    | alcohol dehydrogenase 1B (class I), beta polypeptide [Source:HGNC Symbol;Acc:250]                                      | 0.27 | 0.31 | 0.38 |
| KLHL14   | kelch-like family member 14 [Source:HGNC Symbol;Acc:29266]                                                             | 0    | 0.04 | 0.11 |
| SNHG12   | small nucleolar RNA host gene 12 (non-protein coding) [Source:HGNC Symbol;Acc:30062]                                   | 0.07 | 0.02 | 0.14 |
| FLYWCH2  | FLYWCH family member 2 [Source:HGNC Symbol;Acc:25178]                                                                  | 0.16 | 0.1  | 0.23 |
| ABCA7    | ATP-binding cassette, sub-family A (ABC1), member 7 [Source:HGNC Symbol;Acc:37]                                        | 0.18 | 0.1  | 0.25 |
| TSPAN17  | tetraspanin 17 [Source:HGNC Symbol;Acc:13594]                                                                          | 0.39 | 0.31 | 0.46 |
| C15orf38 | chromosome 15 open reading frame 38 [Source:HGNC Symbol;Acc:28782]                                                     | 0.38 | 0.46 | 0.53 |
| POMT1    | protein-O-mannosyltransferase 1 [Source:HGNC Symbol;Acc:9202]                                                          | 0.12 | 0.03 | 0.19 |
| ZFPM2    | zinc finger protein, FOG family member 2 [Source:HGNC Symbol;Acc:16700]                                                | 0.09 | 0.19 | 0.26 |
| PID1     | phosphotyrosine interaction domain containing 1 [Source:HGNC Symbol;Acc:26084]                                         | 0.16 | 0.26 | 0.33 |
| ANKLE1   | ankyrin repeat and LEM domain containing 1 [Source:HGNC Symbol;Acc:26812]                                              | 0.24 | 0.35 | 0.42 |
| TASP1    | taspase, threonine aspartase, 1 [Source:HGNC Symbol;Acc:15859]                                                         | 0.06 | 0.18 | 0.25 |
| SUMO3    | SMT3 suppressor of mif two 3 homolog 3 (S. cerevisiae) [Source:HGNC Symbol;Acc:11124]                                  | 0.13 | 0.3  | 0.37 |
| HK1      | hexokinase 1 [Source:HGNC Symbol;Acc:4922]                                                                             | 0.25 | 0.43 | 0.5  |
| CBX2     | chromobox homolog 2 [Source:HGNC Symbol;Acc:1552]                                                                      | 0.02 | 0.01 | 0.09 |
| TMEM17   | transmembrane protein 17 [Source:HGNC Symbol;Acc:26623]                                                                | 0.03 | 0.05 | 0.12 |
| TCF3     | transcription factor 3 (E2A immunoglobulin enhancer binding factors E12/E47) [Source:HGNC Symbol;Acc:11633]            | 0.08 | 0.11 | 0.18 |
| RTN3     | reticulon 3 [Source:HGNC Symbol;Acc:10469]                                                                             | 0.11 | 0.07 | 0.18 |
| DPP6     | dipeptidyl-peptidase 6 [Source:HGNC Symbol;Acc:3010]                                                                   | 0.05 | 0    | 0.12 |
| TMEM154  | transmembrane protein 154 [Source:HGNC Symbol;Acc:26489]                                                               | 0.11 | 0.05 | 0.18 |
| RRM2     | ribonucleotide reductase M2 [Source:HGNC Symbol;Acc:10452]                                                             | 0.11 | 0.03 | 0.18 |
| CD80     | CD80 molecule [Source:HGNC Symbol;Acc:1700]                                                                            | 0.13 | 0.14 | 0.21 |
| DTX3L    | deltex 3-like (Drosophila) [Source:HGNC Symbol;Acc:30323]                                                              | 0.11 | 0.22 | 0.29 |
| PARP9    | poly (ADP-ribose) polymerase family, member 9 [Source:HGNC Symbol;Acc:24118]                                           | 0.11 | 0.22 | 0.29 |
| LAYN     | layilin [Source:HGNC Symbol;Acc:29471]                                                                                 | 0.87 | 0.87 | 0.94 |
| LAX1     | lymphocyte transmembrane adaptor 1 [Source:HGNC Symbol;Acc:26005]                                                      | 0.89 | 0.89 | 0.96 |
| HTN3     | histatin 3 [Source:HGNC Symbol;Acc:5284]                                                                               | 0.93 | 0.93 | 1    |
| C9orf66  | chromosome 9 open reading frame 66 [Source:HGNC Symbol;Acc:26436]                                                      | 0.77 | 0.77 | 0.84 |
| GPR84    | G protein-coupled receptor 84 [Source:HGNC Symbol;Acc:4535]                                                            | 0.87 | 0.86 | 0.94 |
| RBP5     | retinol binding protein 5, cellular [Source:HGNC Symbol;Acc:15847]                                                     | 0.52 | 0.51 | 0.59 |
| EVPLL    | envoplakin-like [Source:HGNC Symbol;Acc:35236]                                                                         | 0.87 | 0.86 | 0.94 |
| SNORD17  | small nucleolar RNA, C/D box 17 [Source:HGNC Symbol;Acc:32713]                                                         | 0.88 | 0.87 | 0.95 |
| PCDHB13  | protocadherin beta 13 [Source:HGNC Symbol;Acc:8684]                                                                    | 0.62 | 0.61 | 0.69 |
| COL15A1  | collagen, type XV, alpha 1 [Source:HGNC Symbol;Acc:2192]                                                               | 0.89 | 0.88 | 0.96 |

|           |                                                                                                                        |      |      |      |
|-----------|------------------------------------------------------------------------------------------------------------------------|------|------|------|
| SLC12A1   | solute carrier family 12 (sodium/potassium/chloride transporters), member 1 [Source:HGNC Symbol;Acc:10910]             | 0.87 | 0.88 | 0.95 |
| BTBD2     | BTB (POZ) domain containing 2 [Source:HGNC Symbol;Acc:15504]                                                           | 0.87 | 0.88 | 0.95 |
| CCL26     | chemokine (C-C motif) ligand 26 [Source:HGNC Symbol;Acc:10625]                                                         | 0.89 | 0.9  | 0.97 |
| STAG3     | stromal antigen 3 [Source:HGNC Symbol;Acc:11356]                                                                       | 0.39 | 0.4  | 0.47 |
| THEM5     | thioesterase superfamily member 5 [Source:HGNC Symbol;Acc:26755]                                                       | 0.88 | 0.86 | 0.95 |
| XPNPEP1   | X-prolyl aminopeptidase (aminopeptidase P) 1, soluble [Source:HGNC Symbol;Acc:12822]                                   | 0.62 | 0.6  | 0.69 |
| ATL1      | atlastin GTPase 1 [Source:HGNC Symbol;Acc:11231]                                                                       | 0.93 | 0.91 | 1    |
| TRAPPC5   | trafficking protein particle complex 5 [Source:HGNC Symbol;Acc:23067]                                                  | 0.6  | 0.62 | 0.69 |
| APOA1     | apolipoprotein A-I [Source:HGNC Symbol;Acc:600]                                                                        | 0.9  | 0.87 | 0.97 |
| JOSD2     | Josephin domain containing 2 [Source:HGNC Symbol;Acc:28853]                                                            | 0.76 | 0.73 | 0.83 |
| UGT2B28   | UDP glucuronosyltransferase 2 family, polypeptide B28 [Source:HGNC Symbol;Acc:13479]                                   | 0.86 | 0.89 | 0.96 |
| C1S       | complement component 1, s subcomponent [Source:HGNC Symbol;Acc:1247]                                                   | 0.87 | 0.83 | 0.94 |
| FLJ34503  | uncharacterized                                                                                                        | 0.88 | 0.84 | 0.95 |
| OR2B3     | olfactory receptor, family 2, subfamily B, member 3 [Source:HGNC Symbol;Acc:8238]                                      | 0.9  | 0.84 | 0.97 |
| CHGB      | chromogranin B (secretogranin 1) [Source:HGNC Symbol;Acc:1930]                                                         | 0.28 | 0.21 | 0.35 |
| YWHAH     | tyrosine 3-monooxygenase/tryptophan 5-monooxygenase activation protein, eta polypeptide [Source:HGNC Symbol;Acc:12853] | 0.8  | 0.89 | 0.96 |
| FAM131B   | family with sequence similarity 131, member B [Source:HGNC Symbol;Acc:22202]                                           | 0.4  | 0.5  | 0.57 |
| ABCD2     | ATP-binding cassette, sub-family D (ALD), member 2 [Source:HGNC Symbol;Acc:66]                                         | 0.34 | 0.24 | 0.41 |
| ANO2      | anoctamin 2 [Source:HGNC Symbol;Acc:1183]                                                                              | 0.67 | 0.78 | 0.85 |
| OR2G2     | olfactory receptor, family 2, subfamily G, member 2 [Source:HGNC Symbol;Acc:15007]                                     | 0.88 | 0.75 | 0.95 |
| DGKA      | diacylglycerol kinase, alpha 80kDa [Source:HGNC Symbol;Acc:2849]                                                       | 0.54 | 0.67 | 0.74 |
| GKN2      | gastrokine 2 [Source:HGNC Symbol;Acc:24588]                                                                            | 0.64 | 0.5  | 0.71 |
| MOGAT3    | monoacylglycerol O-acyltransferase 3 [Source:HGNC Symbol;Acc:23249]                                                    | 0.56 | 0.42 | 0.63 |
| RAB27A    | RAB27A, member RAS oncogene family [Source:HGNC Symbol;Acc:9766]                                                       | 0.91 | 0.74 | 0.98 |
| TYMP      | thymidine phosphorylase [Source:HGNC Symbol;Acc:3148]                                                                  | 0.49 | 0.66 | 0.73 |
| GRM2      | glutamate receptor, metabotropic 2 [Source:HGNC Symbol;Acc:4594]                                                       | 0.79 | 0.53 | 0.86 |
| CELA1     | chymotrypsin-like elastase family, member 1 [Source:HGNC Symbol;Acc:3308]                                              | 0.75 | 0.48 | 0.82 |
| GMFG      | glia maturation factor, gamma [Source:HGNC Symbol;Acc:4374]                                                            | 0.75 | 0.46 | 0.82 |
| ZNF208    | zinc finger protein 208 [Source:HGNC Symbol;Acc:12999]                                                                 | 0.72 | 0.72 | 0.78 |
| TMEM184B  | transmembrane protein 184B [Source:HGNC Symbol;Acc:1310]                                                               | 0.5  | 0.5  | 0.56 |
| EPS8L3    | EPS8-like 3 [Source:HGNC Symbol;Acc:21297]                                                                             | 0.82 | 0.81 | 0.88 |
| CLNK      | cytokine-dependent hematopoietic cell linker [Source:HGNC Symbol;Acc:17438]                                            | 0.93 | 0.94 | 1    |
| TSPAN32   | tetraspanin 32 [Source:HGNC Symbol;Acc:13410]                                                                          | 0.87 | 0.86 | 0.93 |
| C11orf21  | chromosome 11 open reading frame 21 [Source:HGNC Symbol;Acc:13231]                                                     | 0.87 | 0.86 | 0.93 |
| SLC14A1   | solute carrier family 14 (urea transporter), member 1 (Kidd blood group) [Source:HGNC Symbol;Acc:10918]                | 0.83 | 0.82 | 0.89 |
| LAD1      | ladinin 1 [Source:HGNC Symbol;Acc:6472]                                                                                | 0.86 | 0.87 | 0.93 |
| VGLL3     | vestigial like 3 (Drosophila) [Source:HGNC Symbol;Acc:24327]                                                           | 0.47 | 0.48 | 0.54 |
| PABPC4L   | poly(A) binding protein, cytoplasmic 4-like [Source:HGNC Symbol;Acc:31955]                                             | 0.74 | 0.75 | 0.81 |
| OR8H1     | olfactory receptor, family 8, subfamily H, member 1 [Source:HGNC Symbol;Acc:14824]                                     | 0.94 | 0.92 | 1    |
| ISLR      | immunoglobulin superfamily containing leucine-rich repeat [Source:HGNC Symbol;Acc:6133]                                | 0.83 | 0.81 | 0.89 |
| HCFC2     | host cell factor C2 [Source:HGNC Symbol;Acc:24972]                                                                     | 0.92 | 0.94 | 1    |
| BCS1L     | BC1 (ubiquinol-cytochrome c reductase) synthesis-like [Source:HGNC Symbol;Acc:1020]                                    | 0.49 | 0.47 | 0.55 |
| TCF15     | transcription factor 15 (basic helix-loop-helix) [Source:HGNC Symbol;Acc:11627]                                        | 0.84 | 0.82 | 0.9  |
| IFIT2     | interferon-induced protein with tetratricopeptide repeats 2 [Source:HGNC Symbol;Acc:5409]                              | 0.83 | 0.85 | 0.91 |
| BEX5      | brain expressed, X-linked 5 [Source:HGNC Symbol;Acc:27990]                                                             | 0.59 | 0.61 | 0.67 |
| DHH       | desert hedgehog [Source:HGNC Symbol;Acc:2865]                                                                          | 0.84 | 0.81 | 0.9  |
| C20orf141 | transmembrane protein 239 [Source:HGNC Symbol;Acc:40044]                                                               | 0.82 | 0.79 | 0.88 |
| CST9      | cystatin 9 (testatin) [Source:HGNC Symbol;Acc:13261]                                                                   | 0.83 | 0.8  | 0.89 |
| TLR9      | TLR9 [Source:UniProtKB/TrEMBL;Acc:C3W5P5]                                                                              | 0.94 | 0.91 | 1    |
| TNNC2     | troponin C type 2 (fast) [Source:HGNC Symbol;Acc:11944]                                                                | 0.91 | 0.94 | 1    |
| BFSP2     | beaded filament structural protein 2, phakinin [Source:HGNC Symbol;Acc:1041]                                           | 0.81 | 0.84 | 0.9  |
| C9orf117  | chromosome 9 open reading frame 117 [Source:HGNC Symbol;Acc:27843]                                                     | 0.79 | 0.82 | 0.88 |
| HSD3B1    | hydroxy-delta-5-steroid dehydrogenase, 3 beta- and steroid delta-isomerase 1 [Source:HGNC Symbol;Acc:5217]             | 0.87 | 0.84 | 0.93 |
| TAC4      | tachykinin 4 (hemokinin) [Source:HGNC Symbol;Acc:16641]                                                                | 0.74 | 0.71 | 0.8  |
| KLK4      | kallikrein-related peptidase 4 [Source:HGNC Symbol;Acc:6365]                                                           | 0.87 | 0.84 | 0.93 |
| REEP5     | receptor accessory protein 5 [Source:HGNC Symbol;Acc:30077]                                                            | 0.78 | 0.82 | 0.88 |
| SERPINA5  | serpin peptidase inhibitor, clade A (alpha-1 antiproteinase, antitrypsin), member 5 [Source:HGNC Symbol;Acc:8723]      | 0.71 | 0.67 | 0.77 |
| CD247     | CD247 molecule [Source:HGNC Symbol;Acc:1677]                                                                           | 0.87 | 0.83 | 0.93 |
| ICAM3     | intercellular adhesion molecule 3 [Source:HGNC Symbol;Acc:5346]                                                        | 0.68 | 0.73 | 0.79 |

|          |                                                                                                                        |      |      |      |
|----------|------------------------------------------------------------------------------------------------------------------------|------|------|------|
| PMP22    | peripheral myelin protein 22 [Source:HGNC Symbol;Acc:9118]                                                             | 0.72 | 0.66 | 0.78 |
| FCRLB    | Fc receptor-like B [Source:HGNC Symbol;Acc:26431]                                                                      | 0.83 | 0.77 | 0.89 |
| CHRM1    | cholinergic receptor, muscarinic 1 [Source:HGNC Symbol;Acc:1950]                                                       | 0.84 | 0.78 | 0.9  |
| EFHB     | EF-hand domain family, member B [Source:HGNC Symbol;Acc:26330]                                                         | 0.67 | 0.73 | 0.79 |
| C19orf69 | chromosome 19 open reading frame 69 [Source:HGNC Symbol;Acc:34497]                                                     | 0.69 | 0.61 | 0.75 |
| SUSD3    | sushi domain containing 3 [Source:HGNC Symbol;Acc:28391]                                                               | 0.5  | 0.58 | 0.64 |
| CRYAA    | crystallin, alpha A [Source:HGNC Symbol;Acc:2388]                                                                      | 0.86 | 0.77 | 0.92 |
| GNAT1    | guanine nucleotide binding protein (G protein), alpha transducing activity polypeptide 1 [Source:HGNC Symbol;Acc:4393] | 0.87 | 0.78 | 0.93 |
| GCK      | glucokinase (hexokinase 4) [Source:HGNC Symbol;Acc:4195]                                                               | 0.86 | 0.76 | 0.92 |
| PAX8     | paired box 8 [Source:HGNC Symbol;Acc:8622]                                                                             | 0.75 | 0.86 | 0.92 |
| TRIM58   | tripartite motif containing 58 [Source:HGNC Symbol;Acc:24150]                                                          | 0.83 | 0.7  | 0.89 |
| HAVCR2   | hepatitis A virus cellular receptor 2 [Source:HGNC Symbol;Acc:18437]                                                   | 0.84 | 0.71 | 0.9  |
| COL9A2   | collagen, type IX, alpha 2 [Source:HGNC Symbol;Acc:2218]                                                               | 0.59 | 0.72 | 0.78 |
| CXCL13   | chemokine (C-X-C motif) ligand 13 [Source:HGNC Symbol;Acc:10639]                                                       | 0.87 | 0.73 | 0.93 |
| OCA2     | oculocutaneous albinism II [Source:HGNC Symbol;Acc:8101]                                                               | 0.71 | 0.86 | 0.92 |
| FAM65A   | family with sequence similarity 65, member A [Source:HGNC Symbol;Acc:25836]                                            | 0.59 | 0.74 | 0.8  |
| HIST1H4L | histone cluster 1, H4a [Source:HGNC Symbol;Acc:4781]                                                                   | 0.58 | 0.73 | 0.79 |
| SLC24A5  | solute carrier family 24, member 5 [Source:HGNC Symbol;Acc:20611]                                                      | 0.86 | 0.64 | 0.92 |
| FAM114A1 | family with sequence similarity 114, member A1 [Source:HGNC Symbol;Acc:25087]                                          | 0.27 | 0.49 | 0.55 |
| ME3      | malic enzyme 3, NADP(+)-dependent, mitochondrial [Source:HGNC Symbol;Acc:6985]                                         | 0.53 | 0.82 | 0.88 |
| GRIP1    | glutamate receptor interacting protein 1 [Source:HGNC Symbol;Acc:18708]                                                | 0.83 | 0.3  | 0.89 |
| KIAA0922 | KIAA0922 [Source:HGNC Symbol;Acc:29146]                                                                                | 0.21 | 0.21 | 0.27 |
| ALPL     | alkaline phosphatase, liver/bone/kidney [Source:HGNC Symbol;Acc:438]                                                   | 0.21 | 0.2  | 0.27 |
| SYT3     | synaptotagmin III [Source:HGNC Symbol;Acc:11511]                                                                       | 0.22 | 0.21 | 0.28 |
| RBM15B   | RNA binding motif protein 15B [Source:HGNC Symbol;Acc:24303]                                                           | 0.21 | 0.19 | 0.27 |
| MPRIIP   | myosin phosphatase Rho interacting protein [Source:HGNC Symbol;Acc:30321]                                              | 0.21 | 0.18 | 0.27 |
| TRAM1L1  | translocation associated membrane protein 1-like 1 [Source:HGNC Symbol;Acc:28371]                                      | 0.18 | 0.21 | 0.27 |
| NKX3-1   | NK3 homeobox 1 [Source:HGNC Symbol;Acc:7838]                                                                           | 0.08 | 0.11 | 0.17 |
| SLCO2A1  | solute carrier organic anion transporter family, member 2A1 [Source:HGNC Symbol;Acc:10955]                             | 0.04 | 0.08 | 0.14 |
| FAM196B  | family with sequence similarity 196, member B [Source:HGNC Symbol;Acc:37271]                                           | 0.08 | 0.02 | 0.14 |
| CCDC147  | coiled-coil domain containing 147 [Source:HGNC Symbol;Acc:26676]                                                       | 0.01 | 0.01 | 0.07 |
| GDF6     | growth differentiation factor 6 [Source:HGNC Symbol;Acc:4221]                                                          | 0    | 0    | 0.06 |
| DAAM2    | dishevelled associated activator of morphogenesis 2 [Source:HGNC Symbol;Acc:18143]                                     | 0.45 | 0.45 | 0.51 |
| FGF8     | fibroblast growth factor 8 (androgen-induced) [Source:HGNC Symbol;Acc:3686]                                            | 0.02 | 0.02 | 0.08 |
| CLPB     | ClpB caseinolytic peptidase B homolog (E. coli) [Source:HGNC Symbol;Acc:30664]                                         | 0.33 | 0.33 | 0.39 |
| KIAA1755 | KIAA1755 [Source:HGNC Symbol;Acc:29372]                                                                                | 0    | 0    | 0.06 |
| SNORD12B | small nucleolar RNA, C/D box 12B [Source:HGNC Symbol;Acc:33573]                                                        | 0    | 0    | 0.06 |
| HPGD     | hydroxyprostaglandin dehydrogenase 15-(NAD) [Source:HGNC Symbol;Acc:5154]                                              | 0    | 0    | 0.06 |
| C4orf33  | chromosome 4 open reading frame 33 [Source:HGNC Symbol;Acc:27025]                                                      | 0    | 0    | 0.06 |
| SLC35B2  | solute carrier family 35, member B2 [Source:HGNC Symbol;Acc:16872]                                                     | 0.07 | 0.07 | 0.13 |
| ACTL6B   | actin-like 6B [Source:HGNC Symbol;Acc:160]                                                                             | 0.35 | 0.35 | 0.41 |
| HKR1     | HKR1, GLI-Kruppel zinc finger family member [Source:HGNC Symbol;Acc:4928]                                              | 0.17 | 0.18 | 0.24 |
| KLHL32   | kelch-like 32 (Drosophila) [Source:HGNC Symbol;Acc:21221]                                                              | 0.23 | 0.24 | 0.3  |
| TMCO4    | transmembrane and coiled-coil domains 4 [Source:HGNC Symbol;Acc:27393]                                                 | 0.06 | 0.05 | 0.12 |
| LRRC3    | leucine rich repeat containing 3 [Source:HGNC Symbol;Acc:14965]                                                        | 0.06 | 0.05 | 0.12 |
| GYPC     | glycophorin C (Gerbich blood group) [Source:HGNC Symbol;Acc:4704]                                                      | 0.02 | 0.01 | 0.08 |
| CSNK1G3  | casein kinase 1, gamma 3 [Source:HGNC Symbol;Acc:2456]                                                                 | 0.14 | 0.13 | 0.2  |
| ENTPD3   | ectonucleoside triphosphate diphosphohydrolase 3 [Source:HGNC Symbol;Acc:3365]                                         | 0.31 | 0.32 | 0.38 |
| RLIM     | ring finger protein, LIM domain interacting [Source:HGNC Symbol;Acc:13429]                                             | 0.37 | 0.38 | 0.44 |
| CHODL    | chondrolectin [Source:HGNC Symbol;Acc:17807]                                                                           | 0.24 | 0.22 | 0.3  |
| RPL39L   | ribosomal protein L39-like [Source:HGNC Symbol;Acc:17094]                                                              | 0.06 | 0.04 | 0.12 |
| STK32C   | serine/threonine kinase 32C [Source:HGNC Symbol;Acc:21332]                                                             | 0.13 | 0.11 | 0.19 |
| ZEB2     | zinc finger E-box binding homeobox 2 [Source:HGNC Symbol;Acc:14881]                                                    | 0.03 | 0.01 | 0.09 |
| MARK1    | MAP/microtubule affinity-regulating kinase 1 [Source:HGNC Symbol;Acc:6896]                                             | 0.01 | 0.03 | 0.09 |
| FAHD2A   | fumarylacetoacetate hydrolase domain containing 2A [Source:HGNC Symbol;Acc:24252]                                      | 0.31 | 0.33 | 0.39 |
| STX17    | syntaxin 17 [Source:HGNC Symbol;Acc:11432]                                                                             | 0.12 | 0.14 | 0.2  |
| LAS1L    | LAS1-like (S. cerevisiae) [Source:HGNC Symbol;Acc:25726]                                                               | 0.38 | 0.4  | 0.46 |
| C11orf35 | chromosome 11 open reading frame 35 [Source:HGNC Symbol;Acc:28561]                                                     | 0.15 | 0.12 | 0.21 |
| RASSF7   | Ras association (RalGDS/AF-6) domain family (N-terminal) member 7 [Source:HGNC Symbol;Acc:1166]                        | 0.15 | 0.12 | 0.21 |
| SNORA26  | Small nucleolar RNA SNORA26 [Source:RFAM;Acc:RF00568]                                                                  | 0.06 | 0.03 | 0.12 |
| PTPRZ1   | protein tyrosine phosphatase, receptor-type, Z polypeptide 1 [Source:HGNC Symbol;Acc:9685]                             | 0.06 | 0.03 | 0.12 |
| ABR      | active BCR-related [Source:HGNC Symbol;Acc:81]                                                                         | 0.13 | 0.09 | 0.19 |

|          |                                                                                                                |      |      |      |
|----------|----------------------------------------------------------------------------------------------------------------|------|------|------|
| GRM1     | glutamate receptor, metabotropic 1 [Source:HGNC Symbol;Acc:4593]                                               | 0.26 | 0.22 | 0.32 |
| CCS      | copper chaperone for superoxide dismutase [Source:HGNC Symbol;Acc:1613]                                        | 0.3  | 0.34 | 0.4  |
| CXorf22  | chromosome X open reading frame 22 [Source:HGNC Symbol;Acc:28546]                                              | 0.41 | 0.45 | 0.51 |
| NKAIN1   | Na <sup>+</sup> /K <sup>+</sup> transporting ATPase interacting 1 [Source:HGNC Symbol;Acc:25743]               | 0.07 | 0.02 | 0.13 |
| C1orf131 | chromosome 1 open reading frame 131 [Source:HGNC Symbol;Acc:25332]                                             | 0.12 | 0.06 | 0.18 |
| GNPAT    | glyceronephosphate O-acyltransferase [Source:HGNC Symbol;Acc:4416]                                             | 0.12 | 0.06 | 0.18 |
| DCHS1    | dachsous 1 (Drosophila) [Source:HGNC Symbol;Acc:13681]                                                         | 0.09 | 0.03 | 0.15 |
| SUPT3H   | suppressor of Ty 3 homolog (S. cerevisiae) [Source:HGNC Symbol;Acc:11466]                                      | 0.1  | 0.04 | 0.16 |
| TGFB2    | transforming growth factor, beta 2 [Source:HGNC Symbol;Acc:11768]                                              | 0.04 | 0.1  | 0.16 |
| HOXA6    | homeobox A6 [Source:HGNC Symbol;Acc:5107]                                                                      | 0.14 | 0.2  | 0.26 |
| KIF12    | kinesin family member 12 [Source:HGNC Symbol;Acc:21495]                                                        | 0.11 | 0.17 | 0.23 |
| RPL18A   | Small nucleolar RNA SNORA68 [Source:RFAM;Acc:RF00263]                                                          | 0.28 | 0.21 | 0.34 |
| USH1G    | Usher syndrome 1G (autosomal recessive) [Source:HGNC Symbol;Acc:16356]                                         | 0.25 | 0.17 | 0.31 |
| MT1G     | metallothionein 1G [Source:HGNC Symbol;Acc:7399]                                                               | 0.11 | 0.19 | 0.25 |
| LDB2     | LIM domain binding 2 [Source:HGNC Symbol;Acc:6533]                                                             | 0.25 | 0.34 | 0.4  |
| VDAC2    | voltage-dependent anion channel 2 [Source:HGNC Symbol;Acc:12672]                                               | 0.15 | 0.04 | 0.21 |
| COL1A1   | collagen, type I, alpha 1 [Source:HGNC Symbol;Acc:2197]                                                        | 0.07 | 0.19 | 0.25 |
| S100A10  | S100 calcium binding protein A10 [Source:HGNC Symbol;Acc:10487]                                                | 0.01 | 0.17 | 0.23 |
| PITPNM3  | PITPNM family member 3 [Source:HGNC Symbol;Acc:21043]                                                          | 0.15 | 0.38 | 0.44 |
| HSF1     | heat shock transcription factor 1 [Source:HGNC Symbol;Acc:5224]                                                | 0.32 | 0.06 | 0.38 |
| BTBD17   | BTB (POZ) domain containing 17 [Source:HGNC Symbol;Acc:33758]                                                  | 0.39 | 0.12 | 0.45 |
| PLCXD3   | phosphatidylinositol-specific phospholipase C, X domain containing 3 [Source:HGNC Symbol;Acc:31822]            | 0.21 | 0.23 | 0.29 |
| PKD1L1   | polycystic kidney disease 1 like 1 [Source:HGNC Symbol;Acc:18053]                                              | 0.91 | 0.91 | 0.97 |
| LCN1     | lipocalin 1 [Source:HGNC Symbol;Acc:6525]                                                                      | 0.9  | 0.9  | 0.96 |
| ZNF735   | zinc finger protein 679 [Source:HGNC Symbol;Acc:28650]                                                         | 0.9  | 0.89 | 0.96 |
| LHX8     | LIM homeobox 8 [Source:HGNC Symbol;Acc:28838]                                                                  | 0.89 | 0.9  | 0.96 |
| AOC2     | amine oxidase, copper containing 2 (retina-specific) [Source:HGNC Symbol;Acc:549]                              | 0.91 | 0.92 | 0.98 |
| TGM2     | transglutaminase 2 (C polypeptide, protein-glutamine-gamma-glutamyltransferase) [Source:HGNC Symbol;Acc:11778] | 0.88 | 0.86 | 0.94 |
| NR1H4    | nuclear receptor subfamily 1, group H, member 4 [Source:HGNC Symbol;Acc:7967]                                  | 0.88 | 0.86 | 0.94 |
| ELANE    | elastase, neutrophil expressed [Source:HGNC Symbol;Acc:3309]                                                   | 0.76 | 0.74 | 0.82 |
| IL24     | interleukin 24 [Source:HGNC Symbol;Acc:11346]                                                                  | 0.9  | 0.92 | 0.98 |
| WFDC9    | WAP four-disulfide core domain 9 [Source:HGNC Symbol;Acc:20380]                                                | 0.9  | 0.87 | 0.96 |
| DIXDC1   | DIX domain containing 1 [Source:HGNC Symbol;Acc:23695]                                                         | 0.76 | 0.79 | 0.85 |
| BEST3    | bestrophin 3 [Source:HGNC Symbol;Acc:17105]                                                                    | 0.88 | 0.91 | 0.97 |
| MSMB     | microseminoprotein, beta- [Source:HGNC Symbol;Acc:7372]                                                        | 0.91 | 0.87 | 0.97 |
| NFE2L3   | nuclear factor (erythroid-derived 2)-like 3 [Source:HGNC Symbol;Acc:7783]                                      | 0.91 | 0.87 | 0.97 |
| OR9A2    | olfactory receptor, family 9, subfamily A, member 2 [Source:HGNC Symbol;Acc:15093]                             | 0.93 | 0.89 | 0.99 |
| TRPA1    | transient receptor potential cation channel, subfamily A, member 1 [Source:HGNC Symbol;Acc:497]                | 0.61 | 0.65 | 0.71 |
| C9orf24  | chromosome 9 open reading frame 24 [Source:HGNC Symbol;Acc:19919]                                              | 0.76 | 0.8  | 0.86 |
| CORO1A   | coronin, actin binding protein, 1A [Source:HGNC Symbol;Acc:2252]                                               | 0.79 | 0.74 | 0.85 |
| FBXO41   | F-box protein 41 [Source:HGNC Symbol;Acc:29409]                                                                | 0.91 | 0.86 | 0.97 |
| ERG      | v-ets erythroblastosis virus E26 oncogene homolog (avian) [Source:HGNC Symbol;Acc:3446]                        | 0.73 | 0.78 | 0.84 |
| TMEM194B | transmembrane protein 194B [Source:HGNC Symbol;Acc:33700]                                                      | 0.82 | 0.88 | 0.94 |
| ARHGDI1B | Rho GDP dissociation inhibitor (GDI) beta [Source:HGNC Symbol;Acc:679]                                         | 0.7  | 0.77 | 0.83 |
| RASAL3   | RAS protein activator like 3 [Source:HGNC Symbol;Acc:26129]                                                    | 0.78 | 0.71 | 0.84 |
| KRT85    | keratin 85 [Source:HGNC Symbol;Acc:6462]                                                                       | 0.89 | 0.81 | 0.95 |
| APOF     | apolipoprotein F [Source:HGNC Symbol;Acc:615]                                                                  | 0.9  | 0.82 | 0.96 |
| C3orf18  | chromosome 3 open reading frame 18 [Source:HGNC Symbol;Acc:24837]                                              | 0.71 | 0.79 | 0.85 |
| C9orf152 | chromosome 9 open reading frame 152 [Source:HGNC Symbol;Acc:31455]                                             | 0.88 | 0.78 | 0.94 |
| CCBE1    | collagen and calcium binding EGF domains 1 [Source:HGNC Symbol;Acc:29426]                                      | 0.41 | 0.51 | 0.57 |
| FHL1     | four and a half LIM domains 1 [Source:HGNC Symbol;Acc:3702]                                                    | 0.81 | 0.71 | 0.87 |
| THBS4    | thrombospondin 4 [Source:HGNC Symbol;Acc:11788]                                                                | 0.41 | 0.52 | 0.58 |
| TBC1D8B  | TBC1 domain family, member 8B (with GRAM domain) [Source:HGNC Symbol;Acc:24715]                                | 0.68 | 0.56 | 0.74 |
| GPR173   | G protein-coupled receptor 173 [Source:HGNC Symbol;Acc:18186]                                                  | 0.52 | 0.4  | 0.58 |
| COL8A2   | collagen, type VIII, alpha 2 [Source:HGNC Symbol;Acc:2216]                                                     | 0.41 | 0.53 | 0.59 |
| ITGA2B   | integrin, alpha 2b (platelet glycoprotein IIb of IIb/IIIa complex, antigen CD41) [Source:HGNC Symbol;Acc:6138] | 0.75 | 0.88 | 0.94 |
| KIF3C    | kinesin family member 3C [Source:HGNC Symbol;Acc:6321]                                                         | 0.53 | 0.66 | 0.72 |
| KNG1     | kininogen 1 [Source:HGNC Symbol;Acc:6383]                                                                      | 0.56 | 0.43 | 0.62 |
| UGT2B4   | UDP glucuronosyltransferase 2 family, polypeptide B4 [Source:HGNC Symbol;Acc:12553]                            | 0.92 | 0.75 | 0.98 |
| DENND1C  | DENN/MADD domain containing 1C [Source:HGNC Symbol;Acc:26225]                                                  | 0.56 | 0.36 | 0.62 |
| SYTL3    | synaptotagmin-like 3 [Source:HGNC Symbol;Acc:15587]                                                            | 0.67 | 0.45 | 0.73 |
| ULBP3    | UL16 binding protein 3 [Source:HGNC Symbol;Acc:14895]                                                          | 0.77 | 0.53 | 0.83 |
| ECHDC2   | enoyl CoA hydratase domain containing 2 [Source:HGNC Symbol;Acc:23408]                                         | 0.51 | 0.78 | 0.84 |
| FGG      | fibrinogen gamma chain [Source:HGNC Symbol;Acc:3694]                                                           | 0.92 | 0.63 | 0.98 |
| FAM26E   | family with sequence similarity 26, member E [Source:HGNC Symbol;Acc:21568]                                    | 0.79 | 0.45 | 0.85 |

|           |                                                                                                           |      |      |      |
|-----------|-----------------------------------------------------------------------------------------------------------|------|------|------|
| CPZ       | carboxypeptidase Z [Source:HGNC Symbol;Acc:2333]                                                          | 0.67 | 0.33 | 0.73 |
| ADAD2     | adenosine deaminase domain containing 2 [Source:HGNC Symbol;Acc:30714]                                    | 0.87 | 0.87 | 0.92 |
| SLC10A4   | solute carrier family 10 (sodium/bile acid cotransporter family), member 4 [Source:HGNC Symbol;Acc:22980] | 0.7  | 0.7  | 0.75 |
| PRKG2     | protein kinase, cGMP-dependent, type II [Source:HGNC Symbol;Acc:9416]                                     | 0.88 | 0.88 | 0.93 |
| ADRB2     | adrenoceptor beta 2, surface [Source:HGNC Symbol;Acc:286]                                                 | 0.85 | 0.86 | 0.91 |
| RPS6KA1   | ribosomal protein S6 kinase, 90kDa, polypeptide 1 [Source:HGNC Symbol;Acc:10430]                          | 0.87 | 0.86 | 0.92 |
| BCAS1     | breast carcinoma amplified sequence 1 [Source:HGNC Symbol;Acc:974]                                        | 0.95 | 0.94 | 1    |
| KCTD6     | potassium channel tetramerisation domain containing 6 [Source:HGNC Symbol;Acc:22235]                      | 0.84 | 0.83 | 0.89 |
| BTBD16    | BTB (POZ) domain containing 16 [Source:HGNC Symbol;Acc:26340]                                             | 0.85 | 0.86 | 0.91 |
| IFIT1B    | interferon-induced protein with tetratricopeptide repeats 1B [Source:HGNC Symbol;Acc:23442]               | 0.75 | 0.76 | 0.81 |
| TPD52     | tumor protein D52 [Source:HGNC Symbol;Acc:12005]                                                          | 0.7  | 0.71 | 0.76 |
| TIGIT     | T cell immunoreceptor with Ig and ITIM domains [Source:HGNC Symbol;Acc:26838]                             | 0.84 | 0.82 | 0.89 |
| AMOT      | angiominin [Source:HGNC Symbol;Acc:17810]                                                                 | 0.86 | 0.88 | 0.93 |
| CALHM2    | calcium homeostasis modulator 2 [Source:HGNC Symbol;Acc:23493]                                            | 0.7  | 0.67 | 0.75 |
| ZNF713    | zinc finger protein 713 [Source:HGNC Symbol;Acc:22043]                                                    | 0.95 | 0.92 | 1    |
| BAALC     | brain and acute leukemia, cytoplasmic [Source:HGNC Symbol;Acc:14333]                                      | 0.81 | 0.84 | 0.89 |
| GLA       | galactosidase, alpha [Source:HGNC Symbol;Acc:4296]                                                        | 0.49 | 0.46 | 0.54 |
| HNRNP2    | heterogeneous nuclear ribonucleoprotein H2 (H') [Source:HGNC Symbol;Acc:5042]                             | 0.49 | 0.46 | 0.54 |
| PDZD4     | PDZ domain containing 4 [Source:HGNC Symbol;Acc:21167]                                                    | 0.69 | 0.72 | 0.77 |
| SNCG      | synuclein, gamma (breast cancer-specific protein 1) [Source:HGNC Symbol;Acc:11141]                        | 0.85 | 0.81 | 0.9  |
| STARD3NL  | STARD3 N-terminal like [Source:HGNC Symbol;Acc:19169]                                                     | 0.91 | 0.95 | 1    |
| MMP12     | matrix metalloproteinase 12 (macrophage elastase) [Source:HGNC Symbol;Acc:7158]                           | 0.86 | 0.82 | 0.91 |
| SULT1A1   | sulfotransferase family, cytosolic, 1A, phenol-preferring, member 1 [Source:HGNC Symbol;Acc:11453]        | 0.83 | 0.78 | 0.88 |
| TRIM38    | tripartite motif containing 38 [Source:HGNC Symbol;Acc:10059]                                             | 0.85 | 0.8  | 0.9  |
| TM4       | transmembrane channel-like 4 [Source:HGNC Symbol;Acc:22998]                                               | 0.54 | 0.59 | 0.64 |
| PROM2     | prominin 2 [Source:HGNC Symbol;Acc:20685]                                                                 | 0.66 | 0.71 | 0.76 |
| RTP3      | receptor (chemosensory) transporter protein 3 [Source:HGNC Symbol;Acc:15572]                              | 0.74 | 0.69 | 0.79 |
| RHD       | Rh blood group, CcEe antigens [Source:HGNC Symbol;Acc:10008]                                              | 0.7  | 0.75 | 0.8  |
| GPA33     | glycoprotein A33 (transmembrane) [Source:HGNC Symbol;Acc:4445]                                            | 0.94 | 0.88 | 0.99 |
| FAM186B   | family with sequence similarity 186, member B [Source:HGNC Symbol;Acc:25296]                              | 0.83 | 0.77 | 0.88 |
| TTC22     | tetratricopeptide repeat domain 22 [Source:HGNC Symbol;Acc:26067]                                         | 0.77 | 0.83 | 0.88 |
| SPOCD1    | SPOC domain containing 1 [Source:HGNC Symbol;Acc:26338]                                                   | 0.51 | 0.57 | 0.62 |
| PPP2R5B   | protein phosphatase 2, regulatory subunit B', beta [Source:HGNC Symbol;Acc:9310]                          | 0.41 | 0.35 | 0.46 |
| KRTAP10-2 | keratin associated protein 10-2 [Source:HGNC Symbol;Acc:22967]                                            | 0.73 | 0.66 | 0.78 |
| C1orf189  | chromosome 1 open reading frame 189 [Source:HGNC Symbol;Acc:32305]                                        | 0.87 | 0.79 | 0.92 |
| TSPAN2    | tetraspanin 2 [Source:HGNC Symbol;Acc:20659]                                                              | 0.88 | 0.8  | 0.93 |
| XAF1      | XIAP associated factor 1 [Source:HGNC Symbol;Acc:30932]                                                   | 0.84 | 0.76 | 0.89 |
| GPT       | glutamic-pyruvate transaminase (alanine aminotransferase) [Source:HGNC Symbol;Acc:4552]                   | 0.85 | 0.77 | 0.9  |
| NPHS2     | nephrosis 2, idiopathic, steroid-resistant (podocin) [Source:HGNC Symbol;Acc:13394]                       | 0.86 | 0.94 | 0.99 |
| NUDT18    | nudix (nucleoside diphosphate linked moiety X)-type motif 18 [Source:HGNC Symbol;Acc:26194]               | 0.55 | 0.63 | 0.68 |
| C10orf11  | chromosome 10 open reading frame 11 [Source:HGNC Symbol;Acc:23405]                                        | 0.84 | 0.75 | 0.89 |
| SIPA1L1   | signal-induced proliferation-associated 1 like 1 [Source:HGNC Symbol;Acc:20284]                           | 0.95 | 0.86 | 1    |
| C20orf202 | chromosome 20 open reading frame 202 [Source:HGNC Symbol;Acc:37254]                                       | 0.82 | 0.73 | 0.87 |
| OIT3      | oncprotein induced transcript 3 [Source:HGNC Symbol;Acc:29953]                                            | 0.86 | 0.95 | 1    |
| ECSCR     | endothelial cell surface expressed chemotaxis and apoptosis regulator [Source:HGNC Symbol;Acc:35454]      | 0.67 | 0.76 | 0.81 |
| KIAA0513  | KIAA0513 [Source:HGNC Symbol;Acc:29058]                                                                   | 0.95 | 0.85 | 1    |
| TNFSF4    | tumor necrosis factor (ligand) superfamily, member 4 [Source:HGNC Symbol;Acc:11934]                       | 0.85 | 0.72 | 0.9  |
| KRT71     | keratin 71 [Source:HGNC Symbol;Acc:28927]                                                                 | 0.83 | 0.69 | 0.88 |
| RNASE13   | ribonuclease, RNase A family, 13 (non-active) [Source:HGNC Symbol;Acc:25285]                              | 0.83 | 0.69 | 0.88 |
| C5orf20   | chromosome 5 open reading frame 20 [Source:HGNC Symbol;Acc:24459]                                         | 0.86 | 0.71 | 0.91 |
| TAS1R2    | taste receptor, type 1, member 2 [Source:HGNC Symbol;Acc:14905]                                           | 0.62 | 0.46 | 0.67 |
| FCRL6     | Fc receptor-like 6 [Source:HGNC Symbol;Acc:31910]                                                         | 0.88 | 0.72 | 0.93 |
| PGAM2     | phosphoglycerate mutase 2 (muscle) [Source:HGNC Symbol;Acc:8889]                                          | 0.51 | 0.7  | 0.75 |
| DNAH2     | dynein, axonemal, heavy chain 2 [Source:HGNC Symbol;Acc:2948]                                             | 0.73 | 0.51 | 0.78 |
| IKZF1     | IKAROS family zinc finger 1 (Ikaros) [Source:HGNC Symbol;Acc:13176]                                       | 0.58 | 0.36 | 0.63 |
| TMBIM1    | transmembrane BAX inhibitor motif containing 1 [Source:HGNC Symbol;Acc:23410]                             | 0.58 | 0.82 | 0.87 |
| MORC2     | MORC family CW-type zinc finger 2 [Source:HGNC Symbol;Acc:23573]                                          | 0.47 | 0.71 | 0.76 |

|          |                                                                                                     |      |      |      |
|----------|-----------------------------------------------------------------------------------------------------|------|------|------|
| OR52J3   | olfactory receptor, family 52, subfamily J, member 3 [Source:HGNC Symbol;Acc:14799]                 | 0.87 | 0.6  | 0.92 |
| LRPAP1   | low density lipoprotein receptor-related protein associated protein 1 [Source:HGNC Symbol;Acc:6701] | 0.48 | 0.12 | 0.53 |
| LRRC23   | leucine rich repeat containing 23 [Source:HGNC Symbol;Acc:19138]                                    | 0.48 | 0.08 | 0.53 |
| C11orf88 | chromosome 11 open reading frame 88 [Source:HGNC Symbol;Acc:25061]                                  | 0.14 | 0.15 | 0.2  |
| HAND2    | heart and neural crest derivatives expressed 2 [Source:HGNC Symbol;Acc:4808]                        | 0.09 | 0.07 | 0.14 |
| WDR63    | WD repeat domain 63 [Source:HGNC Symbol;Acc:30711]                                                  | 0.12 | 0.1  | 0.17 |
| GLIPR1L1 | GLI pathogenesis-related 1 like 1 [Source:HGNC Symbol;Acc:28392]                                    | 0.15 | 0.13 | 0.2  |
| RFX5     | regulatory factor X, 5 (influences HLA class II expression) [Source:HGNC Symbol;Acc:9986]           | 0.09 | 0.06 | 0.14 |
| SPEF1    | sperm flagellar 1 [Source:HGNC Symbol;Acc:15874]                                                    | 0.15 | 0.12 | 0.2  |
| TUBA8    | tubulin, alpha 8 [Source:HGNC Symbol;Acc:12410]                                                     | 0.05 | 0.09 | 0.14 |
| PHYH     | phytanoyl-CoA 2-hydroxylase [Source:HGNC Symbol;Acc:8940]                                           | 0.12 | 0.07 | 0.17 |
| SLC25A42 | solute carrier family 25, member 42 [Source:HGNC Symbol;Acc:28380]                                  | 0.21 | 0.15 | 0.26 |
| NKX2-3   | NK2 homeobox 3 [Source:HGNC Symbol;Acc:7836]                                                        | 0.16 | 0.22 | 0.27 |
| SH2B3    | SH2B adaptor protein 3 [Source:HGNC Symbol;Acc:29605]                                               | 0.04 | 0.12 | 0.17 |
| KSR2     | kinase suppressor of ras 2 [Source:HGNC Symbol;Acc:18610]                                           | 0.12 | 0.21 | 0.26 |
| RSAD1    | radical S-adenosyl methionine domain containing 1 [Source:HGNC Symbol;Acc:25634]                    | 0.12 | 0.02 | 0.17 |
| LBX2     | ladybird homeobox 2 [Source:HGNC Symbol;Acc:15525]                                                  | 0.07 | 0.18 | 0.23 |
| PRDM13   | PR domain containing 13 [Source:HGNC Symbol;Acc:13998]                                              | 0.18 | 0.06 | 0.23 |
| CBorf73  | maestro heat-like repeat family member 6 [Source:HGNC Symbol;Acc:27814]                             | 0.09 | 0.22 | 0.27 |
| SALL4    | sal-like 4 (Drosophila) [Source:HGNC Symbol;Acc:15924]                                              | 0.08 | 0.23 | 0.28 |
| SHE      | Src homology 2 domain containing E [Source:HGNC Symbol;Acc:27004]                                   | 0.05 | 0.05 | 0.1  |
| TDRD10   | tudor domain containing 10 [Source:HGNC Symbol;Acc:25316]                                           | 0.05 | 0.05 | 0.1  |
| LCOR     | ligand dependent nuclear receptor corepressor [Source:HGNC Symbol;Acc:29503]                        | 0.03 | 0.03 | 0.08 |
| HHEX     | hematopoietically expressed homeobox [Source:HGNC Symbol;Acc:4901]                                  | 0.02 | 0.02 | 0.07 |
| GDF10    | growth differentiation factor 10 [Source:HGNC Symbol;Acc:4215]                                      | 0    | 0    | 0.05 |
| DLX4     | distal-less homeobox 4 [Source:HGNC Symbol;Acc:2917]                                                | 0.05 | 0.05 | 0.1  |
| NEURL3   | neuronalized homolog 3 (Drosophila) pseudogene [Source:HGNC Symbol;Acc:25162]                       | 0.03 | 0.03 | 0.08 |
| EVX1     | even-skipped homeobox 1 [Source:HGNC Symbol;Acc:3506]                                               | 0.02 | 0.02 | 0.07 |
| DECR1    | 2,4-dienoyl CoA reductase 1, mitochondrial [Source:HGNC Symbol;Acc:2753]                            | 0.02 | 0.02 | 0.07 |
| FAM129A  | family with sequence similarity 129, member A [Source:HGNC Symbol;Acc:16784]                        | 0.11 | 0.1  | 0.16 |
| ANK3     | ankyrin 3, node of Ranvier (ankyrin G) [Source:HGNC Symbol;Acc:494]                                 | 0.03 | 0.02 | 0.08 |
| APOA1BP  | apolipoprotein A-1 binding protein [Source:HGNC Symbol;Acc:18453]                                   | 0.05 | 0.04 | 0.1  |
| GPR135   | G protein-coupled receptor 135 [Source:HGNC Symbol;Acc:19991]                                       | 0.01 | 0.02 | 0.07 |
| FZD5     | frizzled family receptor 5 [Source:HGNC Symbol;Acc:4043]                                            | 0.01 | 0.02 | 0.07 |
| PPARA    | peroxisome proliferator-activated receptor alpha [Source:HGNC Symbol;Acc:9232]                      | 0.03 | 0.01 | 0.08 |
| PRDM8    | PR domain containing 8 [Source:HGNC Symbol;Acc:13993]                                               | 0.03 | 0.01 | 0.08 |
| EBF4     | early B-cell factor 4 [Source:HGNC Symbol;Acc:29278]                                                | 0.09 | 0.11 | 0.16 |
| HMOX1    | heme oxygenase (decycling) 1 [Source:HGNC Symbol;Acc:5013]                                          | 0.04 | 0.06 | 0.11 |
| PPP1CC   | protein phosphatase 1, catalytic subunit, gamma isozyme [Source:HGNC Symbol;Acc:9283]               | 0.06 | 0.03 | 0.11 |
| PRKCH    | protein kinase C, eta [Source:HGNC Symbol;Acc:9403]                                                 | 0.05 | 0.11 | 0.16 |
| FIBP     | fibroblast growth factor (acidic) intracellular binding protein [Source:HGNC Symbol;Acc:3705]       | 0.01 | 0.01 | 0.06 |
| BICD1    | bicaudal D homolog 1 (Drosophila) [Source:HGNC Symbol;Acc:1049]                                     | 0.04 | 0.04 | 0.09 |
| SRI      | sorcin [Source:HGNC Symbol;Acc:11292]                                                               | 0.01 | 0.01 | 0.06 |
| CCDC88C  | coiled-coil domain containing 88C [Source:HGNC Symbol;Acc:19967]                                    | 0.04 | 0.03 | 0.09 |
| RASSF2   | Ras association (RalGDS/AF-6) domain family member 2 [Source:HGNC Symbol;Acc:9883]                  | 0    | 0.01 | 0.06 |
| RRAD     | Ras-related associated with diabetes [Source:HGNC Symbol;Acc:10446]                                 | 0.17 | 0.17 | 0.22 |
| OSBPL5   | oxysterol binding protein-like 5 [Source:HGNC Symbol;Acc:16392]                                     | 0.31 | 0.3  | 0.36 |
| DFNB59   | deafness, autosomal recessive 59 [Source:HGNC Symbol;Acc:29502]                                     | 0.13 | 0.12 | 0.18 |
| COL23A1  | collagen, type XXIII, alpha 1 [Source:HGNC Symbol;Acc:22990]                                        | 0.25 | 0.24 | 0.3  |
| ESD      | esterase D [Source:HGNC Symbol;Acc:3465]                                                            | 0.06 | 0.07 | 0.12 |
| EXOC3L2  | exocyst complex component 3-like 2 [Source:HGNC Symbol;Acc:30162]                                   | 0.15 | 0.16 | 0.21 |
| YIPF6    | Yip1 domain family, member 6 [Source:HGNC Symbol;Acc:28304]                                         | 0.37 | 0.38 | 0.43 |
| EVC      | Ellis van Creveld syndrome [Source:HGNC Symbol;Acc:3497]                                            | 0.14 | 0.16 | 0.21 |
| SQLE     | squalene epoxidase [Source:HGNC Symbol;Acc:11279]                                                   | 0.17 | 0.19 | 0.24 |
| TMEM128  | transmembrane protein 128 [Source:HGNC Symbol;Acc:28201]                                            | 0.28 | 0.26 | 0.33 |
| ALS2CL   | ALS2 C-terminal like [Source:HGNC Symbol;Acc:20605]                                                 | 0.44 | 0.46 | 0.51 |
| HECW1    | HECT, C2 and WW domain containing E3 ubiquitin protein ligase 1 [Source:HGNC Symbol;Acc:22195]      | 0.24 | 0.21 | 0.29 |
| MAPRE3   | microtubule-associated protein, RP/EB family, member 3 [Source:HGNC Symbol;Acc:6892]                | 0.04 | 0.07 | 0.12 |
| CLIC6    | chloride intracellular channel 6 [Source:HGNC Symbol;Acc:2065]                                      | 0.13 | 0.16 | 0.21 |
| AVPR1B   | arginine vasopressin receptor 1B [Source:HGNC Symbol;Acc:896]                                       | 0.43 | 0.46 | 0.51 |
| RASA2    | RAS p21 protein activator 2 [Source:HGNC Symbol;Acc:9872]                                           | 0.17 | 0.13 | 0.22 |
| CCDC87   | coiled-coil domain containing 87 [Source:HGNC Symbol;Acc:25579]                                     | 0.32 | 0.37 | 0.42 |

|          |                                                                                                                         |      |      |      |
|----------|-------------------------------------------------------------------------------------------------------------------------|------|------|------|
| FAM150B  | family with sequence similarity 150, member B [Source:HGNC Symbol;Acc:27683]                                            | 0.02 | 0.07 | 0.12 |
| MTA3     | metastasis associated 1 family, member 3 [Source:HGNC Symbol;Acc:23784]                                                 | 0.18 | 0.24 | 0.29 |
| TRIB2    | tribbles homolog 2 (Drosophila) [Source:HGNC Symbol;Acc:30809]                                                          | 0.13 | 0.19 | 0.24 |
| DUSP19   | dual specificity phosphatase 19 [Source:HGNC Symbol;Acc:18894]                                                          | 0.27 | 0.21 | 0.32 |
| LGR6     | leucine-rich repeat containing G protein-coupled receptor 6 [Source:HGNC Symbol;Acc:19719]                              | 0.31 | 0.24 | 0.36 |
| WNT10B   | wingless-type MMTV integration site family, member 10B [Source:HGNC Symbol;Acc:12775]                                   | 0.16 | 0.24 | 0.29 |
| MBNL1    | muscleblind-like splicing regulator 1 [Source:HGNC Symbol;Acc:6923]                                                     | 0.46 | 0.38 | 0.51 |
| L3MBTL4  | l(3)mbt-like 4 (Drosophila) [Source:HGNC Symbol;Acc:26677]                                                              | 0.15 | 0.24 | 0.29 |
| MATN2    | matrilin 2 [Source:HGNC Symbol;Acc:6908]                                                                                | 0.05 | 0.14 | 0.19 |
| EFNB3    | ephrin-B3 [Source:HGNC Symbol;Acc:3228]                                                                                 | 0.04 | 0.14 | 0.19 |
| FBP1     | fructose-1,6-bisphosphatase 1 [Source:HGNC Symbol;Acc:3606]                                                             | 0.04 | 0.14 | 0.19 |
| TRIM45   | tripartite motif containing 45 [Source:HGNC Symbol;Acc:19018]                                                           | 0.16 | 0.05 | 0.21 |
| HTR7     | 5-hydroxytryptamine (serotonin) receptor 7, adenylate cyclase-coupled [Source:HGNC Symbol;Acc:5302]                     | 0.19 | 0.33 | 0.38 |
| SUCLG1   | succinate-CoA ligase, alpha subunit [Source:HGNC Symbol;Acc:11449]                                                      | 0.24 | 0.09 | 0.29 |
| IBTK     | inhibitor of Bruton agammaglobulinemia tyrosine kinase [Source:HGNC Symbol;Acc:17853]                                   | 0.25 | 0.1  | 0.3  |
| EHHADH   | enoyl-CoA, hydratase/3-hydroxyacyl CoA dehydrogenase [Source:HGNC Symbol;Acc:3247]                                      | 0.23 | 0.39 | 0.44 |
| ABHD6    | abhydrolase domain containing 6 [Source:HGNC Symbol;Acc:21398]                                                          | 0.28 | 0.45 | 0.5  |
| HSD17B8  | hydroxysteroid (17-beta) dehydrogenase 8 [Source:HGNC Symbol;Acc:3554]                                                  | 0.14 | 0.36 | 0.41 |
| AFF3     | AF4/FMR2 family, member 3 [Source:HGNC Symbol;Acc:6473]                                                                 | 0.13 | 0.38 | 0.43 |
| TNNT3    | troponin T type 3 (skeletal, fast) [Source:HGNC Symbol;Acc:11950]                                                       | 0.89 | 0.89 | 0.94 |
| REC8     | REC8 homolog (yeast) [Source:HGNC Symbol;Acc:16879]                                                                     | 0.92 | 0.92 | 0.97 |
| SAP30BP  | SAP30 binding protein [Source:HGNC Symbol;Acc:30785]                                                                    | 0.78 | 0.78 | 0.83 |
| RECQL5   | RecQ protein-like 5 [Source:HGNC Symbol;Acc:9950]                                                                       | 0.79 | 0.79 | 0.84 |
| ANKRD23  | ankyrin repeat domain 23 [Source:HGNC Symbol;Acc:24470]                                                                 | 0.92 | 0.92 | 0.97 |
| IL1A     | interleukin 1, alpha [Source:HGNC Symbol;Acc:5991]                                                                      | 0.68 | 0.68 | 0.73 |
| MUC4     | mucin 4, cell surface associated [Source:HGNC Symbol;Acc:7514]                                                          | 0.92 | 0.92 | 0.97 |
| SLC36A3  | solute carrier family 36 (proton/amino acid symporter), member 3 [Source:HGNC Symbol;Acc:19659]                         | 0.92 | 0.92 | 0.97 |
| OR1411   | olfactory receptor, family 14, subfamily J, member 1 [Source:HGNC Symbol;Acc:13971]                                     | 0.9  | 0.9  | 0.95 |
| HEPFL1   | hephaestin-like 1 [Source:HGNC Symbol;Acc:30477]                                                                        | 0.8  | 0.79 | 0.85 |
| FUT8     | fucosyltransferase 8 (alpha (1,6) fucosyltransferase) [Source:HGNC Symbol;Acc:4019]                                     | 0.9  | 0.89 | 0.95 |
| CD300C   | CD300c molecule [Source:HGNC Symbol;Acc:19320]                                                                          | 0.89 | 0.88 | 0.94 |
| SGK494   | uncharacterized serine/threonine-protein kinase SgK494 [Source:RefSeq peptide;Acc:NP_001167574]                         | 0.9  | 0.89 | 0.95 |
| CDH26    | cadherin 26 [Source:HGNC Symbol;Acc:15902]                                                                              | 0.93 | 0.92 | 0.98 |
| LTA      | lymphotoxin alpha (TNF superfamily, member 1) [Source:HGNC Symbol;Acc:6709]                                             | 0.91 | 0.9  | 0.96 |
| CYP3A5   | cytochrome P450, family 3, subfamily A, polypeptide 5 [Source:HGNC Symbol;Acc:2638]                                     | 0.92 | 0.91 | 0.97 |
| KCNN4    | potassium intermediate/small conductance calcium-activated channel, subfamily N, member 4 [Source:HGNC Symbol;Acc:6293] | 0.88 | 0.89 | 0.94 |
| GNLY     | granulysin [Source:HGNC Symbol;Acc:4414]                                                                                | 0.92 | 0.93 | 0.98 |
| TTPAL    | tocopherol (alpha) transfer protein-like [Source:HGNC Symbol;Acc:16114]                                                 | 0.64 | 0.65 | 0.7  |
| ZNF883   | zinc finger protein 883 [Source:HGNC Symbol;Acc:27271]                                                                  | 0.67 | 0.68 | 0.73 |
| ESRRB    | estrogen-related receptor beta [Source:HGNC Symbol;Acc:3473]                                                            | 0.9  | 0.88 | 0.95 |
| EXOSC9   | exosome component 9 [Source:HGNC Symbol;Acc:9137]                                                                       | 0.66 | 0.64 | 0.71 |
| TDO2     | tryptophan 2,3-dioxygenase [Source:HGNC Symbol;Acc:11708]                                                               | 0.9  | 0.88 | 0.95 |
| SLC6A11  | solute carrier family 6 (neurotransmitter transporter, GABA), member 11 [Source:HGNC Symbol;Acc:11044]                  | 0.87 | 0.89 | 0.94 |
| GSTA3    | glutathione S-transferase alpha 3 [Source:HGNC Symbol;Acc:4628]                                                         | 0.87 | 0.89 | 0.94 |
| NYNRIN   | NYN domain and retroviral integrase containing [Source:HGNC Symbol;Acc:20165]                                           | 0.8  | 0.77 | 0.85 |
| MAGEA5   | melanoma antigen family A, 5 [Source:HGNC Symbol;Acc:6803]                                                              | 0.93 | 0.9  | 0.98 |
| ABCA12   | ATP-binding cassette, sub-family A (ABC1), member 12 [Source:HGNC Symbol;Acc:14637]                                     | 0.87 | 0.9  | 0.95 |
| LRCH1    | leucine-rich repeats and calponin homology (CH) domain containing 1 [Source:HGNC Symbol;Acc:20309]                      | 0.76 | 0.8  | 0.85 |
| GLT1D1   | glycosyltransferase 1 domain containing 1 [Source:HGNC Symbol;Acc:26483]                                                | 0.86 | 0.9  | 0.95 |
| SPDEF    | SAM pointed domain containing ets transcription factor [Source:HGNC Symbol;Acc:17257]                                   | 0.91 | 0.86 | 0.96 |
| TMEM176A | transmembrane protein 176A [Source:HGNC Symbol;Acc:24930]                                                               | 0.77 | 0.72 | 0.82 |
| GLP2R    | glucagon-like peptide 2 receptor [Source:HGNC Symbol;Acc:4325]                                                          | 0.75 | 0.8  | 0.85 |
| USP51    | ubiquitin specific peptidase 51 [Source:HGNC Symbol;Acc:23086]                                                          | 0.5  | 0.55 | 0.6  |
| DHRS9    | dehydrogenase/reductase (SDR family) member 9 [Source:HGNC Symbol;Acc:16888]                                            | 0.79 | 0.73 | 0.84 |
| PTPN7    | protein tyrosine phosphatase, non-receptor type 7 [Source:HGNC Symbol;Acc:9659]                                         | 0.92 | 0.86 | 0.97 |



|          |                                                                                             |      |      |      |
|----------|---------------------------------------------------------------------------------------------|------|------|------|
| ATP6V0A4 | ATPase, H+ transporting, lysosomal V0 subunit a4 [Source:HGNC Symbol;Acc:866]               | 0.79 | 0.73 | 0.84 |
| TMEM213  | transmembrane protein 213 [Source:HGNC Symbol;Acc:27220]                                    | 0.79 | 0.73 | 0.84 |
| GOT1L1   | glutamic-oxaloacetic transaminase 1-like 1 [Source:HGNC Symbol;Acc:28487]                   | 0.92 | 0.86 | 0.97 |
| OTUD5    | OTU domain containing 5 [Source:HGNC Symbol;Acc:25402]                                      | 0.89 | 0.83 | 0.94 |
| OR6V1    | olfactory receptor, family 6, subfamily V, member 1 [Source:HGNC Symbol;Acc:15090]          | 0.89 | 0.82 | 0.94 |
| EPS15    | epidermal growth factor receptor pathway substrate 15 [Source:HGNC Symbol;Acc:3419]         | 0.57 | 0.64 | 0.69 |
| TFF2     | trefoil factor 2 [Source:HGNC Symbol;Acc:11756]                                             | 0.93 | 0.85 | 0.98 |
| OR5A51   | olfactory receptor, family 5, subfamily AS, member 1 [Source:HGNC Symbol;Acc:15261]         | 0.9  | 0.81 | 0.95 |
| KCNJ10   | potassium inwardly-rectifying channel, subfamily J, member 10 [Source:HGNC Symbol;Acc:6256] | 0.92 | 0.83 | 0.97 |
| C1QTNF8  | C1q and tumor necrosis factor related protein 8 [Source:HGNC Symbol;Acc:31374]              | 0.9  | 0.8  | 0.95 |
| OR10K1   | olfactory receptor, family 10, subfamily K, member 1 [Source:HGNC Symbol;Acc:14693]         | 0.93 | 0.83 | 0.98 |
| PTGER1   | prostaglandin E receptor 1 (subtype EP1), 42kDa [Source:HGNC Symbol;Acc:9593]               | 0.77 | 0.66 | 0.82 |
| CTSE     | cathepsin E [Source:HGNC Symbol;Acc:2530]                                                   | 0.93 | 0.82 | 0.98 |
| CYP2B6   | cytochrome P450, family 2, subfamily B, polypeptide 6 [Source:HGNC Symbol;Acc:2615]         | 0.92 | 0.8  | 0.97 |
| CEACAM19 | carcinoembryonic antigen-related cell adhesion molecule 19 [Source:HGNC Symbol;Acc:31951]   | 0.68 | 0.56 | 0.73 |
| BTN3A3   | butyrophilin, subfamily 3, member A3 [Source:HGNC Symbol;Acc:1140]                          | 0.77 | 0.63 | 0.82 |
| RXRβ     | retinoid X receptor, beta [Source:HGNC Symbol;Acc:10478]                                    | 0.68 | 0.54 | 0.73 |
| ZSCAN1   | zinc finger and SCAN domain containing 1 [Source:HGNC Symbol;Acc:23712]                     | 0.53 | 0.67 | 0.72 |
| PGLYRP4  | peptidoglycan recognition protein 4 [Source:HGNC Symbol;Acc:30015]                          | 0.8  | 0.65 | 0.85 |
| ITGAX    | integrin, alpha X (complement component 3 receptor 4 subunit) [Source:HGNC Symbol;Acc:6152] | 0.89 | 0.72 | 0.94 |
| EPHX4    | epoxide hydrolase 4 [Source:HGNC Symbol;Acc:23758]                                          | 0.63 | 0.8  | 0.85 |
| TPI1     | triosephosphate isomerase 1 [Source:HGNC Symbol;Acc:12009]                                  | 0.4  | 0.66 | 0.71 |
| C16orf3  | chromosome 16 open reading frame 3 [Source:HGNC Symbol;Acc:1197]                            | 0.67 | 0.38 | 0.72 |
| DRP2     | dystrophin related protein 2 [Source:HGNC Symbol;Acc:3032]                                  | 0.77 | 0.44 | 0.82 |
| TUB      | tubby homolog (mouse) [Source:HGNC Symbol;Acc:12406]                                        | 0.8  | 0.28 | 0.85 |
