# Supplementary material
Source: PubMed Central journal article supplement (PMC3973069)
Supplement: 13238_2013_16_MOESM11_ESM.pdf [file 13238_2013_16_MOESM11_ESM.pdf]

| Gene Name    | Description and ID                                                                                                                              | DNA methylation |          |         |
|--------------|-------------------------------------------------------------------------------------------------------------------------------------------------|-----------------|----------|---------|
|              |                                                                                                                                                 | ES-mCpG         | NSC-mCpG | CM-mCpG |
| POPODC2      | popeye domain containing 2 [Source:HGNC Symbol;Acc:17648]                                                                                       | 0.93            | 0.94     | 0.53    |
| ALPK2        | alpha-kinase 2 [Source:HGNC Symbol;Acc:20565]                                                                                                   | 0.78            | 0.59     | 0.25    |
| RHOBTB2      | Rho-related BTB domain containing 2 [Source:HGNC Symbol;Acc:18756]                                                                              | 0.96            | 0.72     | 0.38    |
| ATP1A4       | ATPase, Na+/K+ transporting, alpha 4 polypeptide [Source:HGNC Symbol;Acc:14073]                                                                 | 0.84            | 0.89     | 0.5     |
| TRIM55       | tripartite motif containing 55 [Source:HGNC Symbol;Acc:14215]                                                                                   | 0.89            | 0.67     | 0.34    |
| SPINK4       | serine peptidase inhibitor, Kazal type 4 [Source:HGNC Symbol;Acc:16646]                                                                         | 0.94            | 0.87     | 0.56    |
| ASPH         | aspartate beta-hydroxylase [Source:HGNC Symbol;Acc:757]                                                                                         | 0.83            | 0.93     | 0.53    |
| LOC100287036 | uncharacterized                                                                                                                                 | 0.91            | 0.53     | 0.26    |
| AKR1B10      | aldo-keto reductase family 1, member B10 (aldose reductase) [Source:HGNC Symbol;Acc:382]                                                        | 0.72            | 0.56     | 0.33    |
| SAMD9        | sterile alpha motif domain containing 9 [Source:HGNC Symbol;Acc:1348]                                                                           | 0.81            | 0.73     | 0.5     |
| ECE2         | endothelin converting enzyme 2 [Source:HGNC Symbol;Acc:13275]                                                                                   | 0.92            | 0.95     | 0.71    |
| DMBT1        | deleted in malignant brain tumors 1 [Source:HGNC Symbol;Acc:2926]                                                                               | 0.88            | 0.69     | 0.48    |
| HSPB7        | heat shock 27kDa protein family, member 7 (cardiovascular) [Source:HGNC Symbol;Acc:5249]                                                        | 0.91            | 0.74     | 0.53    |
| FILIP1       | filamin A interacting protein 1 [Source:HGNC Symbol;Acc:21015]                                                                                  | 0.91            | 0.75     | 0.54    |
| GBP1         | guanylate binding protein 1, interferon-inducible [Source:HGNC Symbol;Acc:4182]                                                                 | 0.88            | 0.91     | 0.68    |
| NPPA         | natriuretic peptide A [Source:HGNC Symbol;Acc:7939]                                                                                             | 0.93            | 0.91     | 0.73    |
| KBTBD10      | kelch-like 41 (Drosophila) [Source:HGNC Symbol;Acc:16905]                                                                                       | 0.9             | 0.91     | 0.72    |
| ACOT11       | acyl-CoA thioesterase 11 [Source:HGNC Symbol;Acc:18156]                                                                                         | 0.86            | 0.78     | 0.6     |
| C2orf71      | chromosome 2 open reading frame 71 [Source:HGNC Symbol;Acc:34383]                                                                               | 0.93            | 0.91     | 0.73    |
| OR4C3        | olfactory receptor, family 4, subfamily C, member 3 [Source:HGNC Symbol;Acc:14697]                                                              | 0.43            | 0.37     | 0.19    |
| P2RY14       | purinergic receptor P2Y, G-protein coupled, 14 [Source:HGNC Symbol;Acc:16442]                                                                   | 0.94            | 0.84     | 0.66    |
| BRD4         | bromodomain containing 4 [Source:HGNC Symbol;Acc:13575]                                                                                         | 0.92            | 0.86     | 0.68    |
| CLIC4        | chloride intracellular channel 4 [Source:HGNC Symbol;Acc:13518]                                                                                 | 0.86            | 0.86     | 0.68    |
| MYL4         | myosin, light chain 4, alkali; atrial, embryonic [Source:HGNC Symbol;Acc:7585]                                                                  | 0.92            | 0.81     | 0.64    |
| TMEM223      | transmembrane protein 223 [Source:HGNC Symbol;Acc:28464]                                                                                        | 0.82            | 0.61     | 0.44    |
| CRYAB        | crystallin, alpha B [Source:HGNC Symbol;Acc:2389]                                                                                               | 0.94            | 0.85     | 0.68    |
| VIT          | vitron [Source:HGNC Symbol;Acc:12697]                                                                                                           | 0.87            | 0.7      | 0.53    |
| NR1I2        | nuclear receptor subfamily 1, group I, member 2 [Source:HGNC Symbol;Acc:7968]                                                                   | 0.91            | 1        | 0.75    |
| SNORA20      | Small nucleolar RNA SNORA20 [Source:RFAM;Acc:RF00401]                                                                                           | 1               | 1        | 0.84    |
| CCL19        | chemokine (C-C motif) ligand 19 [Source:HGNC Symbol;Acc:10617]                                                                                  | 0.91            | 0.92     | 0.75    |
| LRRN4        | leucine rich repeat neuronal 4 [Source:HGNC Symbol;Acc:16208]                                                                                   | 0.68            | 0.71     | 0.53    |
| C10orf71     | chromosome 10 open reading frame 71 [Source:HGNC Symbol;Acc:26973]                                                                              | 0.84            | 0.64     | 0.49    |
| IL9          | interleukin 9 [Source:HGNC Symbol;Acc:6029]                                                                                                     | 0.93            | 0.89     | 0.74    |
| POF1B        | premature ovarian failure, 1B [Source:HGNC Symbol;Acc:13711]                                                                                    | 0.74            | 0.7      | 0.55    |
| SNORA46      | Small nucleolar RNA SNORA46 [Source:RFAM;Acc:RF00404]                                                                                           | 0.82            | 0.85     | 0.67    |
| SOD3         | superoxide dismutase 3, extracellular [Source:HGNC Symbol;Acc:11181]                                                                            | 0.83            | 0.84     | 0.68    |
| MYBPHL       | myosin binding protein H-like [Source:HGNC Symbol;Acc:30434]                                                                                    | 0.75            | 0.33     | 0.19    |
| TMEM72       | transmembrane protein 72 [Source:HGNC Symbol;Acc:31658]                                                                                         | 0.64            | 0.7      | 0.5     |
| HRG          | histidine-rich glycoprotein [Source:HGNC Symbol;Acc:5181]                                                                                       | 1               | 1        | 0.86    |
| CRYGS        | crystallin, gamma S [Source:HGNC Symbol;Acc:2417]                                                                                               | 0.96            | 1        | 0.82    |
| C3orf43      | chromosome 3 open reading frame 43 [Source:HGNC Symbol;Acc:27407]                                                                               | 0.87            | 0.91     | 0.73    |
| CXorf64      | chromosome X open reading frame 64 [Source:HGNC Symbol;Acc:34498]                                                                               | 0.76            | 0.8      | 0.62    |
| NCCRP1       | non-specific cytotoxic cell receptor protein 1 homolog (zebrafish) [Source:HGNC Symbol;Acc:33739]                                               | 0.37            | 0.18     | 0.04    |
| MYO22        | myozenin 2 [Source:HGNC Symbol;Acc:1330]                                                                                                        | 0.97            | 0.96     | 0.83    |
| OBSCN        | obscurin, cytoskeletal calmodulin and titin-interacting RhoGEF [Source:HGNC Symbol;Acc:15719]                                                   | 0.9             | 0.86     | 0.73    |
| KLHL30       | kelch-like 30 (Drosophila) [Source:HGNC Symbol;Acc:24770]                                                                                       | 0.94            | 0.84     | 0.71    |
| LOC440563    | heterogeneous nuclear ribonucleoprotein C-like 1 [Source:HGNC Symbol;Acc:29295]                                                                 | 0.92            | 0.87     | 0.74    |
| FLJ43860     | uncharacterized protein LOC389690 [Source:RefSeq peptide;Acc:NP_997297]                                                                         | 0.88            | 0.84     | 0.71    |
| RNF43        | ring finger protein 43 [Source:HGNC Symbol;Acc:18505]                                                                                           | 0.29            | 0.25     | 0.12    |
| KNCN         | kinocilin [Source:HGNC Symbol;Acc:26488]                                                                                                        | 0.88            | 0.87     | 0.74    |
| SEMA4A       | sema domain, immunoglobulin domain (Ig), transmembrane domain (TM) and short cytoplasmic domain, (semaphorin) 4A [Source:HGNC Symbol;Acc:10729] | 0.89            | 0.88     | 0.75    |
| MPG          | N-methylpurine-DNA glycosylase [Source:HGNC Symbol;Acc:7211]                                                                                    | 0.98            | 1        | 0.85    |
| CGA          | glycoprotein hormones, alpha polypeptide [Source:HGNC Symbol;Acc:1885]                                                                          | 0.91            | 0.92     | 0.78    |
| ACSL4        | acyl-CoA synthetase long-chain family member 4 [Source:HGNC Symbol;Acc:3571]                                                                    | 0.6             | 0.6      | 0.47    |
| COL4A5       | collagen, type IV, alpha 5 [Source:HGNC Symbol;Acc:2207]                                                                                        | 0.33            | 0.36     | 0.21    |
| COL4A6       | collagen, type IV, alpha 6 [Source:HGNC Symbol;Acc:2208]                                                                                        | 0.33            | 0.36     | 0.21    |
| FBXL20       | F-box and leucine-rich repeat protein 20 [Source:HGNC Symbol;Acc:24679]                                                                         | 0.2             | 0.17     | 0.05    |
| SMPX         | small muscle protein, X-linked [Source:HGNC Symbol;Acc:11122]                                                                                   | 0.92            | 0.85     | 0.73    |
| ELF3         | E74-like factor 3 (ets domain transcription factor, epithelial-specific) [Source:HGNC Symbol;Acc:3318]                                          | 0.74            | 0.85     | 0.62    |

|           |                                                                                                              |      |      |      |
|-----------|--------------------------------------------------------------------------------------------------------------|------|------|------|
| MURC      | muscle-related coiled-coil protein [Source:HGNC Symbol;Acc:33742]                                            | 0.93 | 0.97 | 0.81 |
| PNPLA4    | patatin-like phospholipase domain containing 4 [Source:HGNC Symbol;Acc:24887]                                | 0.46 | 0.6  | 0.35 |
| NDST1     | N-deacetylase/N-sulfotransferase (heparan glucosaminyl) 1 [Source:HGNC Symbol;Acc:7680]                      | 1    | 0.98 | 0.87 |
| MAGEB18   | melanoma antigen family B, 18 [Source:HGNC Symbol;Acc:28515]                                                 | 0.78 | 0.76 | 0.65 |
| MXRA8     | matrix-remodelling associated 8 [Source:HGNC Symbol;Acc:7542]                                                | 0.92 | 0.95 | 0.81 |
| CLCA1     | chloride channel accessory 1 [Source:HGNC Symbol;Acc:2015]                                                   | 1    | 1    | 0.89 |
| MD6       | mediator complex subunit 6 [Source:HGNC Symbol;Acc:19970]                                                    | 0.84 | 0.91 | 0.73 |
| SLC44A4   | solute carrier family 44, member 4 [Source:HGNC Symbol;Acc:13941]                                            | 0.98 | 0.92 | 0.82 |
| TRPM3     | transient receptor potential cation channel, subfamily M, member 3 [Source:HGNC Symbol;Acc:17992]            | 0.92 | 0.92 | 0.82 |
| NRK       | Nik related kinase [Source:HGNC Symbol;Acc:25391]                                                            | 0.48 | 0.51 | 0.38 |
| ABLIM1    | actin binding LIM protein 1 [Source:HGNC Symbol;Acc:78]                                                      | 0.83 | 0.83 | 0.73 |
| MAOA      | monoamine oxidase A [Source:HGNC Symbol;Acc:6833]                                                            | 0.55 | 0.42 | 0.32 |
| C14orf180 | chromosome 14 open reading frame 180 [Source:HGNC Symbol;Acc:33795]                                          | 0.92 | 0.84 | 0.74 |
| PHEX      | phosphate regulating endopeptidase homolog, X-linked [Source:HGNC Symbol;Acc:8918]                           | 0.83 | 0.75 | 0.65 |
| OR4C45    | olfactory receptor, family 4, subfamily C, member 45 [Source:HGNC Symbol;Acc:31270]                          | 0.76 | 0.7  | 0.6  |
| CLEC4E    | C-type lectin domain family 4, member E [Source:HGNC Symbol;Acc:14555]                                       | 1    | 1    | 0.9  |
| PNPO      | pyridoxamine 5'-phosphate oxidase [Source:HGNC Symbol;Acc:30260]                                             | 0.42 | 0.47 | 0.32 |
| OR2H1     | olfactory receptor, family 2, subfamily H, member 1 [Source:HGNC Symbol;Acc:8252]                            | 0.95 | 0.93 | 0.84 |
| IFNK      | interferon, kappa [Source:HGNC Symbol;Acc:21714]                                                             | 0.94 | 0.93 | 0.84 |
| HSP90AB2P | heat shock protein 90kDa alpha (cytosolic), class B member 2, pseudogene [Source:HGNC Symbol;Acc:32537]      | 0.93 | 0.95 | 0.84 |
| FAM26D    | family with sequence similarity 26, member D [Source:HGNC Symbol;Acc:21094]                                  | 0.91 | 0.92 | 0.82 |
| ACSF2     | acyl-CoA synthetase family member 2 [Source:HGNC Symbol;Acc:26101]                                           | 0.7  | 0.73 | 0.61 |
| INSC      | inscuteable homolog (Drosophila) [Source:HGNC Symbol;Acc:33116]                                              | 0.9  | 0.71 | 0.62 |
| KLK12     | kallikrein-related peptidase 12 [Source:HGNC Symbol;Acc:6360]                                                | 0.67 | 0.61 | 0.52 |
| UTS2      | urotensin 2 [Source:HGNC Symbol;Acc:12636]                                                                   | 0.93 | 0.9  | 0.81 |
| UGT2B7    | UDP glucuronosyltransferase 2 family, polypeptide B7 [Source:HGNC Symbol;Acc:12554]                          | 0.76 | 0.75 | 0.66 |
| MPZ       | myelin protein zero [Source:HGNC Symbol;Acc:7225]                                                            | 0.86 | 0.94 | 0.77 |
| ATP1A2    | ATPase, Na <sup>+</sup> /K <sup>+</sup> transporting, alpha 2 polypeptide [Source:HGNC Symbol;Acc:800]       | 0.59 | 0.59 | 0.5  |
| RPS6KA4   | ribosomal protein S6 kinase, 90kDa, polypeptide 4 [Source:HGNC Symbol;Acc:10433]                             | 0.36 | 0.38 | 0.27 |
| KIAA1671  | KIAA1671 [Source:HGNC Symbol;Acc:29345]                                                                      | 0.82 | 0.83 | 0.73 |
| SYNPO2L   | synaptopodin 2-like [Source:HGNC Symbol;Acc:23532]                                                           | 0.9  | 0.93 | 0.82 |
| GJD4      | GJD4 protein [Source:UniProtKB/TrEMBL;Acc:Q8IV12]                                                            | 0.89 | 0.81 | 0.73 |
| IL21      | interleukin 21 [Source:HGNC Symbol;Acc:6005]                                                                 | 0.95 | 0.9  | 0.82 |
| KCNAB1    | potassium voltage-gated channel, shaker-related subfamily, beta member 1 [Source:HGNC Symbol;Acc:6228]       | 0.95 | 0.93 | 0.85 |
| C1orf106  | chromosome 1 open reading frame 106 [Source:HGNC Symbol;Acc:25599]                                           | 0.78 | 0.81 | 0.7  |
| TBXAS1    | thromboxane A synthase 1 (platelet) [Source:HGNC Symbol;Acc:11609]                                           | 0.91 | 0.92 | 0.83 |
| APOBEC3G  | apolipoprotein B mRNA editing enzyme, catalytic polypeptide-like 3G [Source:HGNC Symbol;Acc:17357]           | 0.34 | 0.36 | 0.26 |
| ANKRD1    | ankyrin repeat domain 1 (cardiac muscle) [Source:HGNC Symbol;Acc:15819]                                      | 0.25 | 0.18 | 0.1  |
| TNNI1     | troponin I type 1 (skeletal, slow) [Source:HGNC Symbol;Acc:11945]                                            | 0.79 | 0.7  | 0.62 |
| C10orf10  | chromosome 10 open reading frame 10 [Source:HGNC Symbol;Acc:23355]                                           | 0.83 | 0.86 | 0.75 |
| HSPB2     | HSPB2-C11orf52 readthrough (non-protein coding) [Source:HGNC Symbol;Acc:41996]                               | 0.86 | 0.76 | 0.68 |
| CSF1R     | colony stimulating factor 1 receptor [Source:HGNC Symbol;Acc:2433]                                           | 0.78 | 0.74 | 0.66 |
| TMPRSS13  | transmembrane protease, serine 13 [Source:HGNC Symbol;Acc:29808]                                             | 0.75 | 0.74 | 0.66 |
| FLJ23867  | uncharacterized                                                                                              | 0.75 | 0.75 | 0.67 |
| BSCL2     | Berardinelli-Seip congenital lipodystrophy 2 (seipin) [Source:HGNC Symbol;Acc:15832]                         | 0.88 | 0.97 | 0.8  |
| GNG3      | guanine nucleotide binding protein (G protein), gamma 3 [Source:HGNC Symbol;Acc:4405]                        | 0.88 | 0.97 | 0.8  |
| KRTAP1-5  | keratin associated protein 1-5 [Source:HGNC Symbol;Acc:16777]                                                | 0.85 | 0.88 | 0.77 |
| MYH6      | myosin, heavy chain 6, cardiac muscle, alpha [Source:HGNC Symbol;Acc:7576]                                   | 0.87 | 0.76 | 0.69 |
| ABRA      | actin-binding Rho activating protein [Source:HGNC Symbol;Acc:30655]                                          | 0.97 | 0.92 | 0.85 |
| TPM1      | tropomyosin 1 (alpha) [Source:HGNC Symbol;Acc:12010]                                                         | 0.77 | 0.88 | 0.7  |
| ZNF793    | zinc finger protein 793 [Source:HGNC Symbol;Acc:33115]                                                       | 0.82 | 0.76 | 0.69 |
| OR5D16    | olfactory receptor, family 5, subfamily D, member 16 [Source:HGNC Symbol;Acc:15283]                          | 0.97 | 0.93 | 0.86 |
| AIPL1     | aryl hydrocarbon receptor interacting protein-like 1 [Source:HGNC Symbol;Acc:359]                            | 0.71 | 0.67 | 0.6  |
| PLEKHG7   | pleckstrin homology domain containing, family G (with RhoGef domain) member 7 [Source:HGNC Symbol;Acc:33829] | 0.94 | 0.91 | 0.84 |
| CRYGC     | crystallin, gamma C [Source:HGNC Symbol;Acc:2410]                                                            | 0.93 | 0.92 | 0.85 |

|          |                                                                                                                            |      |      |      |
|----------|----------------------------------------------------------------------------------------------------------------------------|------|------|------|
| ABCA4    | ATP-binding cassette, sub-family A (ABC1), member 4 [Source:HGNC Symbol;Acc:34]                                            | 0.9  | 0.91 | 0.83 |
| PF4V1    | platelet factor 4 variant 1 [Source:HGNC Symbol;Acc:8862]                                                                  | 0.68 | 0.78 | 0.61 |
| GALNT5   | UDP-N-acetyl-alpha-D-galactosamine:polypeptide N-acetylglucosaminyltransferase 5 (GalNAc-T5) [Source:HGNC Symbol;Acc:4127] | 0.32 | 0.27 | 0.2  |
| SCAF1    | SR-related CTD-associated factor 1 [Source:HGNC Symbol;Acc:30403]                                                          | 0.88 | 0.4  | 0.33 |
| MAGEL2   | MAGE-like 2 [Source:HGNC Symbol;Acc:6814]                                                                                  | 0.57 | 0.45 | 0.38 |
| CASK     | calcium/calmodulin-dependent serine protein kinase (MAGUK family) [Source:HGNC Symbol;Acc:1497]                            | 0.56 | 0.49 | 0.42 |
| L3MBTL1  | l(3)mbt-like 1 (Drosophila) [Source:HGNC Symbol;Acc:15905]                                                                 | 0.43 | 0.39 | 0.32 |
| NPHP1    | nephronophthisis 1 (juvenile) [Source:HGNC Symbol;Acc:7905]                                                                | 0.53 | 0.51 | 0.44 |
| DNAJC16  | DnaJ (Hsp40) homolog, subfamily C, member 16 [Source:HGNC Symbol;Acc:29157]                                                | 0.42 | 0.52 | 0.35 |
| TEAD4    | TEA domain family member 4 [Source:HGNC Symbol;Acc:11717]                                                                  | 0.08 | 0.1  | 0.01 |
| TSPAN14  | tetraspanin 14 [Source:HGNC Symbol;Acc:23303]                                                                              | 0.18 | 0.27 | 0.11 |
| RAB20    | RAB20, member RAS oncogene family [Source:HGNC Symbol;Acc:18260]                                                           | 0.21 | 0.21 | 0.14 |
| SPP1     | secreted phosphoprotein 1 [Source:HGNC Symbol;Acc:11255]                                                                   | 0.84 | 0.88 | 0.77 |
| SLC10A3  | solute carrier family 10 (sodium/bile acid cotransporter family), member 3 [Source:HGNC Symbol;Acc:22979]                  | 0.83 | 0.71 | 0.64 |
| BBOX1    | butyrobetaine (gamma), 2-oxoglutarate dioxygenase (gamma-butyrobetaine hydroxylase) 1 [Source:HGNC Symbol;Acc:964]         | 0.92 | 0.82 | 0.75 |
| SPANXN5  | SPANX family, member N5 [Source:HGNC Symbol;Acc:33178]                                                                     | 0.71 | 0.63 | 0.56 |
| DAPL1    | death associated protein-like 1 [Source:HGNC Symbol;Acc:21490]                                                             | 0.48 | 0.41 | 0.34 |
| CFHR4    | complement factor H-related 4 [Source:HGNC Symbol;Acc:16979]                                                               | 0.96 | 0.95 | 0.88 |
| HNF1A    | HNF1 homeobox A [Source:HGNC Symbol;Acc:11621]                                                                             | 0.99 | 0.98 | 0.91 |
| CLCA2    | chloride channel accessory 2 [Source:HGNC Symbol;Acc:2016]                                                                 | 1    | 1    | 0.93 |
| SCGB2A1  | secretoglobin, family 2A, member 1 [Source:HGNC Symbol;Acc:7051]                                                           | 0.96 | 1    | 0.89 |
| C15orf52 | chromosome 15 open reading frame 52 [Source:HGNC Symbol;Acc:33488]                                                         | 0.87 | 0.91 | 0.8  |
| MIA      | melanoma inhibitory activity [Source:HGNC Symbol;Acc:7076]                                                                 | 0.87 | 0.97 | 0.8  |
| CECR2    | cat eye syndrome chromosome region, candidate 2 [Source:HGNC Symbol;Acc:1840]                                              | 0.95 | 0.96 | 0.88 |
| MYOM1    | myomesin 1 [Source:HGNC Symbol;Acc:7613]                                                                                   | 0.92 | 0.9  | 0.84 |
| RAB15    | RAB15, member RAS oncogene family [Source:HGNC Symbol;Acc:20150]                                                           | 0.67 | 0.71 | 0.61 |
| MYOZ3    | myozenin 3 [Source:HGNC Symbol;Acc:18565]                                                                                  | 0.73 | 0.64 | 0.58 |
| ANXA9    | annexin A9 [Source:HGNC Symbol;Acc:547]                                                                                    | 0.82 | 0.76 | 0.7  |
| HMHA1    | histocompatibility (minor) HA-1 [Source:HGNC Symbol;Acc:17102]                                                             | 0.73 | 0.67 | 0.61 |
| ZNF366   | zinc finger protein 366 [Source:HGNC Symbol;Acc:18316]                                                                     | 0.92 | 0.9  | 0.84 |
| FAM65C   | family with sequence similarity 65, member C [Source:HGNC Symbol;Acc:16168]                                                | 0.58 | 0.56 | 0.5  |
| S100A3   | S100 calcium binding protein A3 [Source:HGNC Symbol;Acc:10493]                                                             | 0.9  | 0.91 | 0.84 |
| PAD11    | peptidyl arginine deiminase, type I [Source:HGNC Symbol;Acc:18367]                                                         | 0.91 | 0.91 | 0.85 |
| NFASC    | neurofascin [Source:HGNC Symbol;Acc:29866]                                                                                 | 0.92 | 0.98 | 0.86 |
| HTR3B    | 5-hydroxytryptamine (serotonin) receptor 3B, ionotropic [Source:HGNC Symbol;Acc:5298]                                      | 0.68 | 0.73 | 0.62 |
| GRM5     | glutamate receptor, metabotropic 5 [Source:HGNC Symbol;Acc:4597]                                                           | 0.63 | 0.92 | 0.57 |
| CD69     | CD69 molecule [Source:HGNC Symbol;Acc:1694]                                                                                | 1    | 1    | 0.94 |
| DAPP1    | dual adaptor of phosphotyrosine and 3-phosphoinositides [Source:HGNC Symbol;Acc:16500]                                     | 0.93 | 0.97 | 0.87 |
| RAB7L1   | RAB7, member RAS oncogene family-like 1 [Source:HGNC Symbol;Acc:9789]                                                      | 0.14 | 0.18 | 0.08 |
| IFIT1    | interferon-induced protein with tetratricopeptide repeats 1 [Source:HGNC Symbol;Acc:5407]                                  | 0.49 | 0.44 | 0.38 |
| PALLD    | palladin, cytoskeletal associated protein [Source:HGNC Symbol;Acc:17068]                                                   | 0.54 | 0.32 | 0.26 |
| TMEM120B | transmembrane protein 120B [Source:HGNC Symbol;Acc:32008]                                                                  | 0.31 | 0.36 | 0.25 |
| RNASE6   | ribonuclease, RNase A family, k6 [Source:HGNC Symbol;Acc:10048]                                                            | 0.49 | 0.38 | 0.32 |
| CHIC1    | cysteine-rich hydrophobic domain 1 [Source:HGNC Symbol;Acc:1934]                                                           | 0.4  | 0.31 | 0.25 |
| SUV39H1  | suppressor of variegation 3-9 homolog 1 (Drosophila) [Source:HGNC Symbol;Acc:11479]                                        | 0.49 | 0.43 | 0.37 |
| MASP1    | mannan-binding lectin serine peptidase 1 (C4/C2 activating component of R-reactive factor) [Source:HGNC Symbol;Acc:6901]   | 0.54 | 0.49 | 0.43 |
| FABP7    | fatty acid binding protein 7, brain [Source:HGNC Symbol;Acc:3562]                                                          | 0.47 | 0.43 | 0.37 |
| FAM63A   | family with sequence similarity 63, member A [Source:HGNC Symbol;Acc:25648]                                                | 0.37 | 0.39 | 0.31 |
| SUDS3    | suppressor of defective silencing 3 homolog (S. cerevisiae) [Source:HGNC Symbol;Acc:29545]                                 | 0.33 | 0.33 | 0.27 |
| UTS2D    | urotensin 2 domain containing [Source:HGNC Symbol;Acc:30894]                                                               | 0.44 | 0.46 | 0.38 |
| TTK      | TTK protein kinase [Source:HGNC Symbol;Acc:12401]                                                                          | 0.29 | 0.31 | 0.23 |
| MYBPC3   | myosin binding protein C, cardiac [Source:HGNC Symbol;Acc:7551]                                                            | 0.89 | 0.83 | 0.77 |
| APLNR    | apelin receptor [Source:HGNC Symbol;Acc:339]                                                                               | 0.96 | 0.94 | 0.88 |
| SNORA45  | small nucleolar RNA, H/ACA box 45 [Source:HGNC Symbol;Acc:32638]                                                           | 0.84 | 0.82 | 0.76 |
| HTR1A    | 5-hydroxytryptamine (serotonin) receptor 1A, G protein-coupled [Source:HGNC Symbol;Acc:5286]                               | 0.73 | 0.71 | 0.65 |
| FSHR     | follicle stimulating hormone receptor [Source:HGNC Symbol;Acc:3969]                                                        | 0.73 | 0.72 | 0.66 |
| OR6C76   | olfactory receptor, family 6, subfamily C, member 76 [Source:HGNC Symbol;Acc:31305]                                        | 0.94 | 0.94 | 0.88 |
| TNS1     | tensin 1 [Source:HGNC Symbol;Acc:11973]                                                                                    | 0.74 | 0.62 | 0.57 |

|          |                                                                                                         |      |      |      |
|----------|---------------------------------------------------------------------------------------------------------|------|------|------|
| CHRNA10  | cholinergic receptor, nicotinic, alpha 10 (neuronal) [Source:HGNC Symbol;Acc:13800]                     | 0.83 | 0.64 | 0.59 |
| OR2T2    | olfactory receptor, family 2, subfamily T, member 2 [Source:HGNC Symbol;Acc:14725]                      | 0.67 | 0.54 | 0.49 |
| BMP10    | bone morphogenetic protein 10 [Source:HGNC Symbol;Acc:20869]                                            | 0.93 | 0.9  | 0.85 |
| NHLH2    | nescient helix loop helix 2 [Source:HGNC Symbol;Acc:7818]                                               | 0.71 | 0.68 | 0.63 |
| MUC15    | mucin 15, cell surface associated [Source:HGNC Symbol;Acc:14956]                                        | 0.95 | 0.92 | 0.87 |
| AMZ2     | archaelysin family metalloproteinase 2 [Source:HGNC Symbol;Acc:28041]                                   | 0.93 | 0.92 | 0.87 |
| OVOL1    | ovo-like 1(Drosophila) [Source:HGNC Symbol;Acc:8525]                                                    | 0.75 | 0.75 | 0.7  |
| SCARNA10 | small Cajal body-specific RNA 10 [Source:HGNC Symbol;Acc:32567]                                         | 0.87 | 0.9  | 0.82 |
| SGCG     | sarcoglycan, gamma (35kDa dystrophin-associated glycoprotein) [Source:HGNC Symbol;Acc:10809]            | 0.87 | 0.9  | 0.82 |
| AIF1     | allograft inflammatory factor 1 [Source:HGNC Symbol;Acc:352]                                            | 0.68 | 0.68 | 0.63 |
| SYBU     | syntabulin (syntaxin-interacting) [Source:HGNC Symbol;Acc:26011]                                        | 0.89 | 0.89 | 0.84 |
| FLNC     | filamin C, gamma [Source:HGNC Symbol;Acc:3756]                                                          | 0.23 | 0.32 | 0.18 |
| IGSF22   | immunoglobulin superfamily, member 22 [Source:HGNC Symbol;Acc:26750]                                    | 0.22 | 0.11 | 0.06 |
| VPS25    | vacuolar protein sorting 25 homolog (S. cerevisiae) [Source:HGNC Symbol;Acc:28122]                      | 0.11 | 0.08 | 0.03 |
| RPH3A    | rabphilin 3A homolog (mouse) [Source:HGNC Symbol;Acc:17056]                                             | 0.1  | 0.11 | 0.05 |
| F2RL2    | coagulation factor II (thrombin) receptor-like 2 [Source:HGNC Symbol;Acc:3539]                          | 0.64 | 0.22 | 0.17 |
| ATG4A    | autophagy related 4A, cysteine peptidase [Source:HGNC Symbol;Acc:16489]                                 | 0.37 | 0.41 | 0.32 |
| FAM70A   | transmembrane protein 255A [Source:HGNC Symbol;Acc:26086]                                               | 0.45 | 0.44 | 0.39 |
| PSMD10   | proteasome (prosome, macropain) 26S subunit, non-ATPase, 10 [Source:HGNC Symbol;Acc:9555]               | 0.37 | 0.41 | 0.32 |
| REG1B    | regenerating islet-derived 1 beta [Source:HGNC Symbol;Acc:9952]                                         | 0.85 | 0.83 | 0.78 |
| KCNS2    | potassium voltage-gated channel, delayed-rectifier, subfamily S, member 2 [Source:HGNC Symbol;Acc:6301] | 0.83 | 0.82 | 0.77 |
| HPX      | hemopexin [Source:HGNC Symbol;Acc:5171]                                                                 | 0.86 | 0.89 | 0.81 |
| MUSK     | muscle, skeletal, receptor tyrosine kinase [Source:HGNC Symbol;Acc:7525]                                | 0.96 | 0.96 | 0.91 |
