# Supplementary material
Source: PubMed Central journal article supplement (PMC3973069)
Supplement: 13238_2013_16_MOESM15_ESM.pdf [file 13238_2013_16_MOESM15_ESM.pdf]

| Gene name    | Description and ID                                                                                            | CM vs ES     | CM vs NSC    |
|--------------|---------------------------------------------------------------------------------------------------------------|--------------|--------------|
| SOX2         | SRY (sex determining region Y)-box 2 [Source:HGNC Symbol;Acc:11195]                                           | -7.839962992 | -7.774789591 |
| PLP1         | proteolipid protein 1 [Source:HGNC Symbol;Acc:9086]                                                           | -7.224921152 | -7.167543891 |
| SOX21        | SRY (sex determining region Y)-box 21 [Source:HGNC Symbol;Acc:11197]                                          | -6.963984948 | -7.926561808 |
| LIN28A       | lin-28 homolog A (C. elegans) [Source:HGNC Symbol;Acc:15986]                                                  | -6.607022034 | -6.846035447 |
| GLDC         | glycine dehydrogenase (decarboxylating) [Source:HGNC Symbol;Acc:4313]                                         | -5.86427679  | -5.965852322 |
| ZIC2         | Zic family member 2 [Source:HGNC Symbol;Acc:12873]                                                            | -6.686744126 | -5.740500141 |
| SCG3         | secretogranin III [Source:HGNC Symbol;Acc:13707]                                                              | -5.834330978 | -5.649633255 |
| PTPRZ1       | protein tyrosine phosphatase, receptor-type, Z polypeptide 1 [Source:HGNC Symbol;Acc:9685]                    | -5.727618544 | -5.625208291 |
| CAMKV        | CaM kinase-like vesicle-associated [Source:HGNC Symbol;Acc:28788]                                             | -5.057126654 | -5.660889156 |
| SP8          | Sp8 transcription factor [Source:HGNC Symbol;Acc:19196]                                                       | -4.92099071  | -6.925985278 |
| SFRP2        | secreted frizzled-related protein 2 [Source:HGNC Symbol;Acc:10777]                                            | -4.92864031  | -4.842781245 |
| CRABP1       | cellular retinoic acid binding protein 1 [Source:HGNC Symbol;Acc:2338]                                        | -4.801158849 | -8.286504634 |
| KCNQ2        | potassium voltage-gated channel, KQT-like subfamily, member 2 [Source:HGNC Symbol;Acc:6296]                   | -4.769309556 | -5.743081305 |
| GN4          | guanine nucleotide binding protein (G protein), gamma 4 [Source:HGNC Symbol;Acc:4407]                         | -4.657414625 | -4.867395733 |
| TOX3         | TOX high mobility group box family member 3 [Source:HGNC Symbol;Acc:11972]                                    | -4.645469371 | -5.590729917 |
| GPM6B        | glycoprotein M6B [Source:HGNC Symbol;Acc:4461]                                                                | -4.612015299 | -5.802143545 |
| EDNRB        | endothelin receptor type B [Source:HGNC Symbol;Acc:3180]                                                      | -4.564931386 | -4.56939646  |
| FUT9         | fucosyltransferase 9 (alpha 1,3) fucosyltransferase [Source:HGNC Symbol;Acc:4020]                             | -4.818795907 | -4.534002331 |
| GDPD2        | glycerophosphodiester phosphodiesterase domain containing 2 [Source:HGNC Symbol;Acc:25974]                    | -4.54373224  | -4.527441968 |
| SLC7A3       | solute carrier family 7 (cationic amino acid transporter, y+ system), member 3 [Source:HGNC Symbol;Acc:11061] | -6.871550081 | -4.471359566 |
| MEGF10       | multiple EGF-like-domains 10 [Source:HGNC Symbol;Acc:29634]                                                   | -4.442057546 | -4.823518037 |
| USP44        | ubiquitin specific peptidase 44 [Source:HGNC Symbol;Acc:20064]                                                | -7.867539796 | -4.373767985 |
| CNTNAP2      | contactin associated protein-like 2 [Source:HGNC Symbol;Acc:13830]                                            | -5.191150191 | -4.343482063 |
| TRIM71       | tripartite motif containing 71, E3 ubiquitin protein ligase [Source:HGNC Symbol;Acc:32669]                    | -5.747294626 | -4.296759092 |
| SALL1        | sal-like 1 (Drosophila) [Source:HGNC Symbol;Acc:10524]                                                        | -4.2858986   | -4.621186702 |
| RGMA         | RGM domain family, member A [Source:HGNC Symbol;Acc:30308]                                                    | -4.169075608 | -6.080173361 |
| NELL2        | NEL-like 2 (chicken) [Source:HGNC Symbol;Acc:7751]                                                            | -4.158390895 | -6.022632479 |
| ZIC5         | Zic family member 5 [Source:HGNC Symbol;Acc:20322]                                                            | -8.194076441 | -4.144546832 |
| LOC100509231 | ovostatin homolog 2-like                                                                                      | -4.140954396 | -4.224717334 |
| LDB2         | LIM domain binding 2 [Source:HGNC Symbol;Acc:6533]                                                            | -5.81007366  | -4.128443604 |
| LPAR4        | lysophosphatidic acid receptor 4 [Source:HGNC Symbol;Acc:4478]                                                | -4.092120637 | -4.590780171 |
| TEX15        | testis expressed 15 [Source:HGNC Symbol;Acc:11738]                                                            | -4.086406948 | -4.09125063  |
| POU3F1       | POU class 3 homeobox 1 [Source:HGNC Symbol;Acc:9214]                                                          | -5.65379929  | -4.062074478 |
| ZNF423       | zinc finger protein 423 [Source:HGNC Symbol;Acc:16762]                                                        | -4.028785258 | -4.812665928 |
| NPTX1        | neuronal pentraxin I [Source:HGNC Symbol;Acc:7952]                                                            | -4.113350319 | -3.982773235 |
| KIF5C        | kinesin family member 5C [Source:HGNC Symbol;Acc:6325]                                                        | -3.954629015 | -5.141412848 |
| DCLK1        | doublecortin-like kinase 1 [Source:HGNC Symbol;Acc:2700]                                                      | -3.893754409 | -4.614117299 |
| ZIC3         | Zic family member 3 [Source:HGNC Symbol;Acc:12874]                                                            | -8.019248449 | -3.828794475 |
| DPPA4        | developmental pluripotency associated 4 [Source:HGNC Symbol;Acc:19200]                                        | -8.039698958 | -3.79741387  |
| PPM1E        | protein phosphatase, Mg2+/Mn2+ dependent, 1E [Source:HGNC Symbol;Acc:19322]                                   | -3.78147062  | -4.941108038 |
| C1orf187     | dorsal inhibitory axon guidance protein [Source:HGNC Symbol;Acc:25054]                                        | -3.7250466   | -4.913959373 |
| PCDH18       | protocadherin 18 [Source:HGNC Symbol;Acc:14268]                                                               | -3.712861256 | -3.769190761 |
| RAB3C        | RAB3C, member RAS oncogene family [Source:HGNC Symbol;Acc:30269]                                              | -3.69419453  | -3.945469082 |
| DEPDC1B      | DEP domain containing 1B [Source:HGNC Symbol;Acc:24902]                                                       | -3.682324665 | -3.700435205 |
| ATCAY        | ataxia, cerebellar, Cayman type [Source:HGNC Symbol;Acc:779]                                                  | -3.679111823 | -4.179098401 |
| RAB11FIP4    | RAB11 family interacting protein 4 (class II) [Source:HGNC Symbol;Acc:30267]                                  | -3.661309438 | -4.475792086 |
| NHLH2        | nescient helix loop helix 2 [Source:HGNC Symbol;Acc:7818]                                                     | -3.649568484 | -6.854177165 |
| MYCL1        | v-myc myelocytomatosis viral oncogene homolog 1, lung carcinoma derived (avian) [Source:HGNC Symbol;Acc:7555] | -3.571893501 | -3.731715667 |
| FABP7        | fatty acid binding protein 7, brain [Source:HGNC Symbol;Acc:3562]                                             | -3.56517929  | -5.553519622 |
| SALL4        | sal-like 4 (Drosophila) [Source:HGNC Symbol;Acc:15924]                                                        | -5.176639541 | -3.549479122 |
| LRRN1        | leucine rich repeat neuronal 1 [Source:HGNC Symbol;Acc:20980]                                                 | -3.690157325 | -3.545691701 |
| CTNNA2       | catenin (cadherin-associated protein), alpha 2 [Source:HGNC Symbol;Acc:2510]                                  | -3.540637526 | -3.591254403 |
| NPTX2        | neuronal pentraxin II [Source:HGNC Symbol;Acc:7953]                                                           | -3.508729908 | -4.80133265  |
| FGFBP3       | fibroblast growth factor binding protein 3 [Source:HGNC Symbol;Acc:23428]                                     | -3.488613093 | -4.758633121 |
| SOX3         | SRY (sex determining region Y)-box 3 [Source:HGNC Symbol;Acc:11199]                                           | -3.487365137 | -6.834135838 |
| CCDC88C      | coiled-coil domain containing 88C [Source:HGNC Symbol;Acc:19967]                                              | -3.486851308 | -3.620045945 |
| CDC7         | cell division cycle 7 [Source:HGNC Symbol;Acc:1745]                                                           | -3.481602511 | -3.6300447   |
| HELLS        | helicase, lymphoid-specific [Source:HGNC Symbol;Acc:4861]                                                     | -3.563082677 | -3.470897269 |
| LIN28B       | lin-28 homolog B (C. elegans) [Source:HGNC Symbol;Acc:32207]                                                  | -3.895469142 | -3.446099009 |
| EFS          | embryonal Fyn-associated substrate [Source:HGNC Symbol;Acc:16898]                                             | -3.444370296 | -3.578775756 |
| IQGAP2       | IQ motif containing GTPase activating protein 2 [Source:HGNC Symbol;Acc:6111]                                 | -3.56455819  | -3.434338911 |
| TMEM158      | transmembrane protein 158 (gene/pseudogene) [Source:HGNC Symbol;Acc:30293]                                    | -3.656748916 | -3.411072344 |
| CBX2         | chromobox homolog 2 [Source:HGNC Symbol;Acc:1552]                                                             | -3.439598224 | -3.409575693 |
| SH3GL2       | SH3-domain GRB2-like 2 [Source:HGNC Symbol;Acc:10831]                                                         | -3.857888698 | -3.397812788 |
| ZNF90        | zinc finger protein 90 [Source:HGNC Symbol;Acc:13165]                                                         | -5.167377754 | -3.395437654 |
| RAPGEF5      | Rap guanine nucleotide exchange factor (GEF) 5 [Source:HGNC Symbol;Acc:16862]                                 | -3.364544848 | -3.754682084 |
| NHS          | Nance-Horan syndrome (congenital cataracts and dental anomalies) [Source:HGNC Symbol;Acc:7820]                | -3.358290213 | -4.098741873 |
| PTPN5        | protein tyrosine phosphatase, non-receptor type 5 (striatum-enriched) [Source:HGNC Symbol;Acc:9657]           | -3.540360425 | -3.345242812 |
| MIR17HG      | microRNA 19a [Source:HGNC Symbol;Acc:31574]                                                                   | -3.797942211 | -3.330138913 |
| PHF21B       | PHD finger protein 21B [Source:HGNC Symbol;Acc:25161]                                                         | -3.315301134 | -4.325174661 |
| MCM10        | minichromosome maintenance complex component 10 [Source:HGNC Symbol;Acc:18043]                                | -3.302537999 | -3.571514844 |
| PROM1        | prominin 1 [Source:HGNC Symbol;Acc:9454]                                                                      | -3.29367641  | -3.8591924   |

|           |                                                                                                                                     |              |              |
|-----------|-------------------------------------------------------------------------------------------------------------------------------------|--------------|--------------|
| RNF175    | ring finger protein 175 [Source:HGNC Symbol;Acc:27735]                                                                              | -3.28820287  | -3.981979886 |
| WSCD1     | WSC domain containing 1 [Source:HGNC Symbol;Acc:29060]                                                                              | -3.261304161 | -3.417103488 |
| FANCD2    | Fanconi anemia, complementation group D2 [Source:HGNC Symbol;Acc:3585]                                                              | -3.53839393  | -3.257923109 |
| FAM64A    | family with sequence similarity 64, member A [Source:HGNC Symbol;Acc:25483]                                                         | -3.280828763 | -3.252523079 |
| C18orf54  | chromosome 18 open reading frame 54 [Source:HGNC Symbol;Acc:13796]                                                                  | -3.816582807 | -3.243167893 |
| IMPA2     | inositol(myo)-1(or 4)-monophosphatase 2 [Source:HGNC Symbol;Acc:6051]                                                               | -4.70418179  | -3.239674659 |
| RGS17     | regulator of G-protein signaling 17 [Source:HGNC Symbol;Acc:14088]                                                                  | -3.695549257 | -3.219413917 |
| MYB       | v-myb myeloblastosis viral oncogene homolog (avian) [Source:HGNC Symbol;Acc:7545]                                                   | -3.374179097 | -3.214364635 |
| COCH      | coagulation factor C homolog, cochlin (Limulus polyphemus) [Source:HGNC Symbol;Acc:2180]                                            | -3.268859979 | -3.185550782 |
| C14orf106 | MIS18 binding protein 1 [Source:HGNC Symbol;Acc:20190]                                                                              | -3.329647477 | -3.160041393 |
| BLM       | Bloom syndrome, RecQ helicase-like [Source:HGNC Symbol;Acc:1058]                                                                    | -3.189573322 | -3.154366064 |
| KIT       | v-kit Hardy-Zuckerman 4 feline sarcoma viral oncogene homolog [Source:HGNC Symbol;Acc:6342]                                         | -3.141762543 | -3.71993571  |
| RTKN2     | rhotekin 2 [Source:HGNC Symbol;Acc:19364]                                                                                           | -3.118215021 | -3.453432174 |
| NEFM      | neurofilament, medium polypeptide [Source:HGNC Symbol;Acc:7734]                                                                     | -3.106054392 | -7.095495018 |
| C14orf162 | coiled-coil domain containing 177 [Source:HGNC Symbol;Acc:23243]                                                                    | -3.103175299 | -3.260421876 |
| TUBB8     | tubulin, beta 8 class VIII [Source:HGNC Symbol;Acc:20773]                                                                           | -3.36803279  | -3.096215044 |
| KIAA0101  | KIAA0101 [Source:HGNC Symbol;Acc:28961]                                                                                             | -3.094862017 | -3.903106969 |
| PSIP1     | PC4 and SFRS1 interacting protein 1 [Source:HGNC Symbol;Acc:9527]                                                                   | -3.755459411 | -3.049104995 |
| ATAD5     | ATPase family, AAA domain containing 5 [Source:HGNC Symbol;Acc:25752]                                                               | -3.440621501 | -3.038619072 |
| KIF21B    | kinesin family member 21B [Source:HGNC Symbol;Acc:29442]                                                                            | -3.029568473 | -3.75648416  |
| CNTLN     | centlein, centrosomal protein [Source:HGNC Symbol;Acc:23432]                                                                        | -3.037285926 | -3.003510708 |
| TAC1      | tachykinin, precursor 1 [Source:HGNC Symbol;Acc:11517]                                                                              | -2.99870726  | -3.483406975 |
| RMI1      | RMI1, RecQ mediated genome instability 1, homolog (S. cerevisiae) [Source:HGNC Symbol;Acc:25764]                                    | -3.146191083 | -2.985720613 |
| CCDC138   | coiled-coil domain containing 138 [Source:HGNC Symbol;Acc:26531]                                                                    | -3.140219262 | -2.984977587 |
| ZNF681    | zinc finger protein 681 [Source:HGNC Symbol;Acc:26457]                                                                              | -2.980553547 | -3.190044838 |
| CDT1      | chromatin licensing and DNA replication factor 1 [Source:HGNC Symbol;Acc:24576]                                                     | -3.086333671 | -2.968633685 |
|           | heterogeneous nuclear ribonucleoprotein U (scaffold attachment factor A) [Source:HGNC Symbol;Acc:5048]                              | -2.962038564 | -2.9890991   |
| HNRNPU    |                                                                                                                                     |              |              |
| BIRC5     | baculoviral IAP repeat containing 5 [Source:HGNC Symbol;Acc:593]                                                                    | -2.944008384 | -3.010642809 |
| PELI2     | pellino E3 ubiquitin protein ligase family member 2 [Source:HGNC Symbol;Acc:8828]                                                   | -3.400712341 | -3.928147046 |
| LRRCC1    | leucine rich repeat and coiled-coil centrosomal protein 1 [Source:HGNC Symbol;Acc:29373]                                            | -2.923257386 | -3.146858579 |
| OVOS2     | ovostatin 2                                                                                                                         | -2.917358306 | -3.450396636 |
| GABRB3    | gamma-aminobutyric acid (GABA) A receptor, beta 3 [Source:HGNC Symbol;Acc:4083]                                                     | -3.787634516 | -2.915319951 |
|           | family with sequence similarity 19 (chemokine (C-C motif)-like), member A5 [Source:HGNC Symbol;Acc:21592]                           |              |              |
| FAM19A5   |                                                                                                                                     | -3.030468448 | -2.912445615 |
| DBF4      | DBF4 homolog (S. cerevisiae) [Source:HGNC Symbol;Acc:17364]                                                                         | -3.040865565 | -2.912227728 |
| GPR19     | G protein-coupled receptor 19 [Source:HGNC Symbol;Acc:4473]                                                                         | -2.910281615 | -3.436087935 |
| DSCC1     | defective in sister chromatid cohesion 1 homolog (S. cerevisiae) [Source:HGNC Symbol;Acc:24453]                                     | -4.123581102 | -2.908907716 |
|           | guanine nucleotide binding protein (G protein), alpha activating activity polypeptide, olfactory type [Source:HGNC Symbol;Acc:4388] |              |              |
| GNAL      |                                                                                                                                     | -3.771013868 | -2.897689294 |
| CDC45     | cell division cycle associated 5 [Source:HGNC Symbol;Acc:14626]                                                                     | -2.892954815 | -2.937012086 |
| PLCH1     | phospholipase C, eta 1 [Source:HGNC Symbol;Acc:29185]                                                                               | -2.869170703 | -4.699135028 |
| TLE1      | transducin-like enhancer of split 1 (E(sp1) homolog, Drosophila) [Source:HGNC Symbol;Acc:11837]                                     | -2.863281887 | -3.309752688 |
| SHANK2    | SH3 and multiple ankyrin repeat domains 2 [Source:HGNC Symbol;Acc:14295]                                                            | -3.954659288 | -2.85542638  |
| C21orf45  | MIS18 kinetochore protein homolog A (S. pombe) [Source:HGNC Symbol;Acc:1286]                                                        | -3.429994012 | -2.853375537 |
| C1orf106  | chromosome 1 open reading frame 106 [Source:HGNC Symbol;Acc:25599]                                                                  | -2.841242907 | -3.539296741 |
|           | family with sequence similarity 19 (chemokine (C-C motif)-like), member A4 [Source:HGNC Symbol;Acc:21591]                           |              |              |
| FAM19A4   |                                                                                                                                     | -2.99529826  | -2.829627197 |
| CDC20     | cell division cycle 20 [Source:HGNC Symbol;Acc:1723]                                                                                | -3.140359658 | -2.818835975 |
| SALL2     | sal-like 2 (Drosophila) [Source:HGNC Symbol;Acc:10526]                                                                              | -3.293897154 | -2.817552006 |
| TMEM194A  | transmembrane protein 194A [Source:HGNC Symbol;Acc:29001]                                                                           | -2.925709694 | -2.798612509 |
| WDHD1     | WD repeat and HMG-box DNA binding protein 1 [Source:HGNC Symbol;Acc:23170]                                                          | -4.004846876 | -2.785190229 |
| CENPF     | centromere protein F, 350/400kDa [Source:HGNC Symbol;Acc:1857]                                                                      | -2.779878838 | -3.553200001 |
| OLFM1     | olfactomedin 1 [Source:HGNC Symbol;Acc:17187]                                                                                       | -3.020349608 | -2.775508267 |
| SOHLH2    | spermatogenesis and oogenesis specific basic helix-loop-helix 2 [Source:HGNC Symbol;Acc:26026]                                      | -3.134453589 | -2.767000679 |
| TMSB15A   | thymosin beta 15a [Source:HGNC Symbol;Acc:30744]                                                                                    | -2.763697467 | -3.580768461 |
| C16orf88  | chromosome 16 open reading frame 88 [Source:HGNC Symbol;Acc:34404]                                                                  | -3.444400303 | -2.761401297 |
| TMPO      | thymopoietin [Source:HGNC Symbol;Acc:11875]                                                                                         | -2.754034116 | -3.164952042 |
| NKAIN1    | Na <sup>+</sup> /K <sup>+</sup> transporting ATPase interacting 1 [Source:HGNC Symbol;Acc:25743]                                    | -2.749606337 | -3.473393397 |
| PLK4      | polo-like kinase 4 [Source:HGNC Symbol;Acc:11397]                                                                                   | -2.748787333 | -2.870475562 |
| STMN3     | stathmin-like 3 [Source:HGNC Symbol;Acc:15926]                                                                                      | -2.736153997 | -5.397062365 |
| DTL       | denticleless E3 ubiquitin protein ligase homolog (Drosophila) [Source:HGNC Symbol;Acc:30288]                                        | -2.923257499 | -2.731174854 |
| CENPV     | centromere protein V [Source:HGNC Symbol;Acc:29920]                                                                                 | -2.729800002 | -3.725464253 |
| PASK      | PAS domain containing serine/threonine kinase [Source:HGNC Symbol;Acc:17270]                                                        | -3.05183214  | -2.684714617 |
| CHRFAM7A  | cholinergic receptor, nicotinic, alpha 7 (neuronal) [Source:HGNC Symbol;Acc:1960]                                                   | -2.683556202 | -2.940300833 |
| ZNF138    | zinc finger protein 138 [Source:HGNC Symbol;Acc:12922]                                                                              | -3.117395647 | -2.678789939 |
| ADD2      | adducin 2 (beta) [Source:HGNC Symbol;Acc:244]                                                                                       | -3.430613525 | -2.676988408 |
| PIF1      | PIF1 5'-to-3' DNA helicase homolog (S. cerevisiae) [Source:HGNC Symbol;Acc:26220]                                                   | -3.65630298  | -2.675838543 |
| SGOL2     | shugoshin-like 2 (S. pombe) [Source:HGNC Symbol;Acc:30812]                                                                          | -2.674371053 | -2.669691368 |
| FLVCR1    | feline leukemia virus subgroup C cellular receptor 1 [Source:HGNC Symbol;Acc:24682]                                                 | -2.852928563 | -2.668792582 |
| CHRNA5    | cholinergic receptor, nicotinic, alpha 5 (neuronal) [Source:HGNC Symbol;Acc:1959]                                                   | -2.676072779 | -2.665351419 |
| SALL3     | sal-like 3 (Drosophila) [Source:HGNC Symbol;Acc:10527]                                                                              | -2.655937651 | -2.860325698 |
| PRPS2     | phosphoribosyl pyrophosphate synthetase 2 [Source:HGNC Symbol;Acc:9465]                                                             | -2.645514157 | -2.676626286 |
| NARG2     | NMDA receptor regulated 2 [Source:HGNC Symbol;Acc:29885]                                                                            | -2.814949577 | -2.634367014 |
| LRIG1     | leucine-rich repeats and immunoglobulin-like domains 1 [Source:HGNC Symbol;Acc:17360]                                               | -2.633646705 | -3.495252683 |
| TOP2A     | topoisomerase (DNA) II alpha 170kDa [Source:HGNC Symbol;Acc:11989]                                                                  | -2.630821238 | -2.713826377 |

|           |                                                                                                                        |              |              |
|-----------|------------------------------------------------------------------------------------------------------------------------|--------------|--------------|
| MKI67     | antigen identified by monoclonal antibody Ki-67 [Source:HGNC Symbol;Acc:7107]                                          | -2.630121999 | -2.708933154 |
| GNG2      | guanine nucleotide binding protein (G protein), gamma 2 [Source:HGNC Symbol;Acc:4404]                                  | -2.629944937 | -5.751320974 |
| PDE7A     | phosphodiesterase 7A [Source:HGNC Symbol;Acc:8791]                                                                     | -2.696015799 | -2.625711226 |
| MYO10     | myosin X [Source:HGNC Symbol;Acc:7593]                                                                                 | -3.25793319  | -2.625229592 |
| C12orf48  | PARP1 binding protein [Source:HGNC Symbol;Acc:26074]                                                                   | -3.031278803 | -2.619537466 |
| CIT       | citron (rho-interacting, serine/threonine kinase 21) [Source:HGNC Symbol;Acc:1985]                                     | -2.618203865 | -2.663328034 |
| HIST1H2BH | histone cluster 1, H2bh [Source:HGNC Symbol;Acc:4755]                                                                  | -3.195240211 | -2.617254242 |
| GINS1     | GINS complex subunit 1 (Psf1 homolog) [Source:HGNC Symbol;Acc:28980]                                                   | -2.861568007 | -2.616319402 |
| POLE2     | polymerase (DNA directed), epsilon 2, accessory subunit [Source:HGNC Symbol;Acc:9178]                                  | -2.952606165 | -2.611297679 |
| NLGN4X    | neuroligin 4, X-linked [Source:HGNC Symbol;Acc:14287]                                                                  | -3.740269827 | -2.607226467 |
| OIP5      | Opa interacting protein 5 [Source:HGNC Symbol;Acc:20300]                                                               | -2.952053911 | -2.60621875  |
| PAPLN     | papilin, proteoglycan-like sulfated glycoprotein [Source:HGNC Symbol;Acc:19262]                                        | -3.190603873 | -2.604410617 |
| CXCL3     | chemokine (C-X-C motif) ligand 3 [Source:HGNC Symbol;Acc:4604]                                                         | -3.108663977 | -2.597648375 |
| MND1      | meiotic nuclear divisions 1 homolog (S. cerevisiae) [Source:HGNC Symbol;Acc:24839]                                     | -2.714563922 | -2.59747157  |
| CHAF1A    | chromatin assembly factor 1, subunit A (p150) [Source:HGNC Symbol;Acc:1910]                                            | -2.705828942 | -2.591508616 |
| PCDH1     | protocadherin 1 [Source:HGNC Symbol;Acc:8655]                                                                          | -4.628006512 | -2.58452412  |
| SMC3      | structural maintenance of chromosomes 3 [Source:HGNC Symbol;Acc:2468]                                                  | -2.572355994 | -2.746105402 |
| SKA3      | spindle and kinetochore associated complex subunit 3 [Source:HGNC Symbol;Acc:20262]                                    | -2.712176896 | -2.572109481 |
| C6orf168  | failed axon connections homolog (Drosophila) [Source:HGNC Symbol;Acc:20742]                                            | -2.564983352 | -2.979833089 |
| IRX2      | iroquois homeobox 2 [Source:HGNC Symbol;Acc:14359]                                                                     | -3.046765998 | -2.564883534 |
| FZD7      | frizzled family receptor 7 [Source:HGNC Symbol;Acc:4045]                                                               | -3.662007165 | -2.561801814 |
| KIF2C     | kinesin family member 2C [Source:HGNC Symbol;Acc:6393]                                                                 | -2.699352129 | -2.557254064 |
| PDE2A     | phosphodiesterase 2A, cGMP-stimulated [Source:HGNC Symbol;Acc:8777]                                                    | -2.821553386 | -2.545747656 |
| NEK2      | NIMA-related kinase 2 [Source:HGNC Symbol;Acc:7745]                                                                    | -2.54518259  | -2.662139123 |
| ORC1      | origin recognition complex, subunit 1 [Source:HGNC Symbol;Acc:8487]                                                    | -2.604581127 | -2.542416781 |
| SHISA3    | shisa homolog 3 (Xenopus laevis) [Source:HGNC Symbol;Acc:25159]                                                        | -2.538087628 | -5.45125201  |
| VASH2     | vasohibin 2 [Source:HGNC Symbol;Acc:25723]                                                                             | -5.407738876 | -2.526994    |
| KIF15     | kinesin family member 15 [Source:HGNC Symbol;Acc:17273]                                                                | -2.52658874  | -3.318068676 |
| RNASEH2A  | ribonuclease H2, subunit A [Source:HGNC Symbol;Acc:18518]                                                              | -2.799487757 | -2.519783376 |
| FBXO5     | F-box protein 5 [Source:HGNC Symbol;Acc:13584]                                                                         | -2.513304574 | -2.564464208 |
| NUDT10    | nudix (nucleoside diphosphate linked moiety X)-type motif 10 [Source:HGNC Symbol;Acc:17621]                            | -2.512125312 | -2.514898221 |
| C13orf34  | bora, aurora kinase A activator [Source:HGNC Symbol;Acc:24724]                                                         | -2.502799919 | -2.654995079 |
| NETO1     | neuropilin (NRP) and tolloid (TLL)-like 1 [Source:HGNC Symbol;Acc:13823]                                               | -2.502119789 | -3.197200288 |
| RAD54L    | RAD54-like (S. cerevisiae) [Source:HGNC Symbol;Acc:9826]                                                               | -2.978470304 | -2.500651243 |
| CHGA      | chromogranin A (parathyroid secretory protein 1) [Source:HGNC Symbol;Acc:1929]                                         | -4.115058061 | -2.499041736 |
| CA2       | carbonic anhydrase II [Source:HGNC Symbol;Acc:1373]                                                                    | -2.498939933 | -3.791676869 |
| CCNB2     | cyclin B2 [Source:HGNC Symbol;Acc:1580]                                                                                | -2.495607011 | -2.493604175 |
| HAUS6     | HAUS augmin-like complex, subunit 6 [Source:HGNC Symbol;Acc:25948]                                                     | -3.071589565 | -2.492873454 |
| PPP4R4    | protein phosphatase 4, regulatory subunit 4 [Source:HGNC Symbol;Acc:23788]                                             | -3.889974906 | -2.489210996 |
| AURKB     | aurora kinase B [Source:HGNC Symbol;Acc:11390]                                                                         | -2.589284169 | -2.488219405 |
| ZNF695    | zinc finger protein 695 [Source:HGNC Symbol;Acc:30954]                                                                 | -3.199658661 | -2.483965125 |
| HES6      | hairly and enhancer of split 6 (Drosophila) [Source:HGNC Symbol;Acc:18254]                                             | -2.482101281 | -4.353965196 |
| PRIM1     | primase, DNA, polypeptide 1 (49kDa) [Source:HGNC Symbol;Acc:9369]                                                      | -3.251238211 | -2.478370603 |
| FIGLN2    | figletin-like 2 [Source:HGNC Symbol;Acc:13287]                                                                         | -2.476124075 | -3.10462778  |
| ST8SIA3   | ST8 alpha-N-acetylneuraminidase alpha-2,8-sialyltransferase 3 [Source:HGNC Symbol;Acc:14269]                           | -2.471957938 | -3.100325429 |
| BTBD17    | BTB (POZ) domain containing 17 [Source:HGNC Symbol;Acc:33758]                                                          | -2.469919439 | -3.810735884 |
| ACBD7     | acyl-CoA binding domain containing 7 [Source:HGNC Symbol;Acc:17715]                                                    | -2.903025587 | -2.466983915 |
| SLC27A2   | solute carrier family 27 (fatty acid transporter), member 2 [Source:HGNC Symbol;Acc:10996]                             | -4.544801875 | -2.462667615 |
| KNTC1     | kinetochore associated 1 [Source:HGNC Symbol;Acc:17255]                                                                | -2.697090219 | -2.460524371 |
| ARHGAP11A | Rho GTPase activating protein 11A [Source:HGNC Symbol;Acc:15783]                                                       | -2.728889493 | -2.460356225 |
| MNS1      | meiosis-specific nuclear structural 1 [Source:HGNC Symbol;Acc:29636]                                                   | -2.459168962 | -2.490790214 |
| BRCA1     | breast cancer 1, early onset [Source:HGNC Symbol;Acc:1100]                                                             | -2.457377335 | -3.075293646 |
| MAP2K6    | mitogen-activated protein kinase kinase 6 [Source:HGNC Symbol;Acc:6846]                                                | -2.457330383 | -2.89736236  |
| ARMC4     | armadillo repeat containing 4 [Source:HGNC Symbol;Acc:25583]                                                           | -3.077878219 | -2.446916145 |
| FEZ1      | fasciculation and elongation protein zeta 1 (zygin I) [Source:HGNC Symbol;Acc:3659]                                    | -2.559768099 | -2.443710794 |
| ZNF551    | zinc finger protein 551 [Source:HGNC Symbol;Acc:25108]                                                                 | -3.337901684 | -2.442893384 |
| ARRB2     | arrestin, beta 2 [Source:HGNC Symbol;Acc:712]                                                                          | -2.614106742 | -2.434356338 |
| STEAP1    | six transmembrane epithelial antigen of the prostate 1 [Source:HGNC Symbol;Acc:11378]                                  | -3.455444632 | -2.4340855   |
| ZNF670    | zinc finger protein 670 [Source:HGNC Symbol;Acc:28167]                                                                 | -2.429368638 | -2.462832127 |
| HMGGB3    | high mobility group box 3 [Source:HGNC Symbol;Acc:5004]                                                                | -2.578240122 | -2.426992565 |
| MCM2      | minichromosome maintenance complex component 2 [Source:HGNC Symbol;Acc:6944]                                           | -2.422636029 | -2.825839029 |
| CCNF      | cyclin F [Source:HGNC Symbol;Acc:1591]                                                                                 | -2.671935327 | -2.421658132 |
| MCM7      | minichromosome maintenance complex component 7 [Source:HGNC Symbol;Acc:6950]                                           | -2.416301799 | -2.472126399 |
| ARL6IP6   | ADP-ribosylation-like factor 6 interacting protein 6 [Source:HGNC Symbol;Acc:24048]                                    | -2.497803303 | -2.408416361 |
| CCNA2     | cyclin A2 [Source:HGNC Symbol;Acc:1578]                                                                                | -2.406753974 | -2.408894012 |
| KIF14     | kinesin family member 14 [Source:HGNC Symbol;Acc:19181]                                                                | -2.585169285 | -2.404478107 |
| RCC1      | regulator of chromosome condensation 1 [Source:HGNC Symbol;Acc:1913]                                                   | -2.400507953 | -2.405259788 |
| ESPL1     | extra spindle pole bodies homolog 1 (S. cerevisiae) [Source:HGNC Symbol;Acc:16856]                                     | -2.399800024 | -2.942828633 |
| C1orf112  | chromosome 1 open reading frame 112 [Source:HGNC Symbol;Acc:25565]                                                     | -2.545270113 | -2.398088182 |
| ZNF519    | zinc finger protein 519 [Source:HGNC Symbol;Acc:30574]                                                                 | -2.66195624  | -2.396866981 |
| HNRNPD    | heterogeneous nuclear ribonucleoprotein D (AU-rich element RNA binding protein 1, 37kDa) [Source:HGNC Symbol;Acc:5036] | -2.395209695 | -2.45022425  |
| C9orf140  | N/A                                                                                                                    | -2.478220422 | -2.389809355 |
| ALPL      | alkaline phosphatase, liver/bone/kidney [Source:HGNC Symbol;Acc:438]                                                   | -3.060848552 | -2.387369401 |
| DLEU7     | deleted in lymphocytic leukemia, 7 [Source:HGNC Symbol;Acc:17567]                                                      | -2.387297636 | -4.587383805 |
| MAD2L1    | MAD2 mitotic arrest deficient-like 1 (yeast) [Source:HGNC Symbol;Acc:6763]                                             | -2.43187875  | -2.386721038 |

|          |                                                                                                                                                                            |              |              |
|----------|----------------------------------------------------------------------------------------------------------------------------------------------------------------------------|--------------|--------------|
| DNMT3B   | DNA (cytosine-5-)-methyltransferase 3 beta [Source:HGNC Symbol;Acc:2979]                                                                                                   | -6.012814171 | -2.381845066 |
| FANCI    | Fanconi anemia, complementation group I [Source:HGNC Symbol;Acc:25568]                                                                                                     | -2.377810728 | -2.653888863 |
| MBD2     | methyl-CpG binding domain protein 2 [Source:HGNC Symbol;Acc:6917]                                                                                                          | -3.49837286  | -2.375102222 |
| TTK      | TTK protein kinase [Source:HGNC Symbol;Acc:12401]                                                                                                                          | -2.631666045 | -2.374155059 |
| ZNF92    | zinc finger protein 92 [Source:HGNC Symbol;Acc:13168]                                                                                                                      | -2.365821539 | -2.462084665 |
| SOX8     | SRY (sex determining region Y)-box 8 [Source:HGNC Symbol;Acc:11203]                                                                                                        | -2.365616734 | -4.703080052 |
| ZDHHC22  | zinc finger, DHHC-type containing 22 [Source:HGNC Symbol;Acc:20106]                                                                                                        | -2.720793011 | -2.359845759 |
| MLF1IP   | MLF1 interacting protein [Source:HGNC Symbol;Acc:21348]                                                                                                                    | -2.450520175 | -2.357249617 |
| FAM54A   | mitochondrial fission regulator 2 [Source:HGNC Symbol;Acc:21115]                                                                                                           | -2.665772723 | -2.355242754 |
| ERCC6L   | excision repair cross-complementing rodent repair deficiency, complementation group 6-like [Source:HGNC Symbol;Acc:20794]                                                  | -3.221690196 | -2.347545818 |
| CDC25C   | cell division cycle 25C [Source:HGNC Symbol;Acc:1727]                                                                                                                      | -2.616314942 | -2.347167344 |
| TUBB2B   | tubulin, beta 2B class IIb [Source:HGNC Symbol;Acc:30829]                                                                                                                  | -2.344667701 | -2.093042512 |
| MCM6     | minichromosome maintenance complex component 6 [Source:HGNC Symbol;Acc:6949]                                                                                               | -2.467672404 | -2.338679028 |
| VRK1     | vaccinia related kinase 1 [Source:HGNC Symbol;Acc:12718]                                                                                                                   | -2.900813463 | -2.336559141 |
| IDH1     | isocitrate dehydrogenase 1 (NADP+), soluble [Source:HGNC Symbol;Acc:5382]                                                                                                  | -2.333667921 | -2.370309803 |
| TCERG1   | transcription elongation regulator 1 [Source:HGNC Symbol;Acc:15630]                                                                                                        | -2.671790777 | -2.327523557 |
| CALML4   | calmodulin-like 4 [Source:HGNC Symbol;Acc:18445]                                                                                                                           | -2.596187058 | -2.325648076 |
| ECT2     | epithelial cell transforming sequence 2 oncogene [Source:HGNC Symbol;Acc:3155]                                                                                             | -2.594187269 | -2.323204752 |
| C4orf21  | chromosome 4 open reading frame 21 [Source:HGNC Symbol;Acc:25654]                                                                                                          | -2.910903121 | -2.323089981 |
| NCAPH    | non-SMC condensin I complex, subunit H [Source:HGNC Symbol;Acc:1112]                                                                                                       | -2.32271253  | -2.424323634 |
| ZNF114   | zinc finger protein 114 [Source:HGNC Symbol;Acc:12894]                                                                                                                     | -3.251773187 | -2.320152123 |
| SEMA5B   | sema domain, seven thrombospondin repeats (type 1 and type 1-like), transmembrane domain (TM) and short cytoplasmic domain, (semaphorin) 5B [Source:HGNC Symbol;Acc:10737] | -2.319834659 | -5.150889037 |
| TAF1A    | TATA box binding protein (TBP)-associated factor, RNA polymerase I, A, 48kDa [Source:HGNC Symbol;Acc:11532]                                                                | -2.463845024 | -2.317282057 |
| KIFC1    | kinesin family member C1 [Source:HGNC Symbol;Acc:6389]                                                                                                                     | -2.314358439 | -2.428275671 |
| PRIM2    | primase, DNA, polypeptide 2 (58kDa) [Source:HGNC Symbol;Acc:9370]                                                                                                          | -2.419633795 | -2.3115573   |
| CA14     | carbonic anhydrase XIV [Source:HGNC Symbol;Acc:1372]                                                                                                                       | -3.987454285 | -2.311536156 |
| NMU      | neuromedin U [Source:HGNC Symbol;Acc:7859]                                                                                                                                 | -2.30910431  | -3.322841062 |
| TOP1MT   | topoisomerase (DNA) I, mitochondrial [Source:HGNC Symbol;Acc:29787]                                                                                                        | -2.945097323 | -2.302339746 |
| GPRC5B   | G protein-coupled receptor, family C, group 5, member B [Source:HGNC Symbol;Acc:13308]                                                                                     | -3.010460138 | -2.297505121 |
| ADRBK2   | adrenergic, beta, receptor kinase 2 [Source:HGNC Symbol;Acc:290]                                                                                                           | -2.410153922 | -2.297424381 |
| B3GAT1   | beta-1,3-glucuronyltransferase 1 (glucuronosyltransferase P) [Source:HGNC Symbol;Acc:921]                                                                                  | -2.29662799  | -2.570590355 |
| RHBDL3   | rhomboid, veinlet-like 3 (Drosophila) [Source:HGNC Symbol;Acc:16502]                                                                                                       | -2.294661688 | -4.218120694 |
| NUSAP1   | nucleolar and spindle associated protein 1 [Source:HGNC Symbol;Acc:18538]                                                                                                  | -2.394257803 | -2.292969991 |
| RGS16    | regulator of G-protein signaling 16 [Source:HGNC Symbol;Acc:9997]                                                                                                          | -2.2917063   | -4.124242911 |
| ZNF232   | zinc finger protein 232 [Source:HGNC Symbol;Acc:13026]                                                                                                                     | -2.39322047  | -2.290547842 |
| TAF5     | TAF5 RNA polymerase II, TATA box binding protein (TBP)-associated factor, 100kDa [Source:HGNC Symbol;Acc:11539]                                                            | -2.432040126 | -2.281609569 |
| MOBKLB   | MOB kinase activator 3B [Source:HGNC Symbol;Acc:23825]                                                                                                                     | -2.281028674 | -3.594146986 |
| RQCD1    | RCD1 required for cell differentiation1 homolog (S. pombe) [Source:HGNC Symbol;Acc:10445]                                                                                  | -2.280646322 | -2.416491151 |
| NCAPG    | non-SMC condensin I complex, subunit G [Source:HGNC Symbol;Acc:24304]                                                                                                      | -2.5187037   | -2.276068471 |
| EXO1     | exonuclease 1 [Source:HGNC Symbol;Acc:3511]                                                                                                                                | -2.702491832 | -2.275191812 |
| RRM1     | ribonucleotide reductase M1 [Source:HGNC Symbol;Acc:10451]                                                                                                                 | -2.274163054 | -2.623006431 |
| C9orf100 | Rho guanine nucleotide exchange factor (GEF) 39 [Source:HGNC Symbol;Acc:25909]                                                                                             | -3.488044348 | -2.273683909 |
| GLI1     | GLI family zinc finger 1 [Source:HGNC Symbol;Acc:4317]                                                                                                                     | -2.273476724 | -3.852324237 |
| VAV3     | vav 3 guanine nucleotide exchange factor [Source:HGNC Symbol;Acc:12659]                                                                                                    | -2.635938264 | -2.272105367 |
| ZNF682   | zinc finger protein 682 [Source:HGNC Symbol;Acc:28857]                                                                                                                     | -2.270756883 | -2.271614105 |
| CALB1    | calbindin 1, 28kDa [Source:HGNC Symbol;Acc:1434]                                                                                                                           | -3.742749525 | -2.270053362 |
| RAD51AP1 | RAD51 associated protein 1 [Source:HGNC Symbol;Acc:16956]                                                                                                                  | -2.53465196  | -2.269603474 |
| FGFR3    | fibroblast growth factor receptor 3 [Source:HGNC Symbol;Acc:3690]                                                                                                          | -2.267828707 | -3.825215155 |
| TIAM1    | T-cell lymphoma invasion and metastasis 1 [Source:HGNC Symbol;Acc:11805]                                                                                                   | -2.265658934 | -2.579514353 |
| SSRP1    | structure specific recognition protein 1 [Source:HGNC Symbol;Acc:11327]                                                                                                    | -2.264186187 | -2.500146101 |
| CENPJ    | centromere protein J [Source:HGNC Symbol;Acc:17272]                                                                                                                        | -2.264052654 | -2.426834944 |
| CCDC109B | coiled-coil domain containing 109B [Source:HGNC Symbol;Acc:26076]                                                                                                          | -2.258092844 | -2.757959764 |
| GINS4    | GINS complex subunit 4 (Sld5 homolog) [Source:HGNC Symbol;Acc:28226]                                                                                                       | -2.257828866 | -2.325402642 |
| BRCA2    | breast cancer 2, early onset [Source:HGNC Symbol;Acc:1101]                                                                                                                 | -2.252654538 | -2.319188966 |
| RAB8B    | RAB8B, member RAS oncogene family [Source:HGNC Symbol;Acc:30273]                                                                                                           | -2.250593072 | -3.089149133 |
| C11orf70 | chromosome 11 open reading frame 70 [Source:HGNC Symbol;Acc:28188]                                                                                                         | -2.250140909 | -3.247195947 |
| DLGAP5   | discs, large (Drosophila) homolog-associated protein 5 [Source:HGNC Symbol;Acc:16864]                                                                                      | -2.808583613 | -2.249328009 |
| C16orf59 | chromosome 16 open reading frame 59 [Source:HGNC Symbol;Acc:25849]                                                                                                         | -2.247417517 | -2.323433818 |
| HIST1H4J | histone cluster 1, H4J [Source:HGNC Symbol;Acc:4785]                                                                                                                       | -2.348355186 | -2.245712241 |
| IGDCC3   | immunoglobulin superfamily, DCC subclass, member 3 [Source:HGNC Symbol;Acc:9700]                                                                                           | -2.244111169 | -5.44112511  |
| TRERF1   | transcriptional regulating factor 1 [Source:HGNC Symbol;Acc:18273]                                                                                                         | -2.242090265 | -2.520670791 |
| IGFBP1L  | insulin-like growth factor binding protein-like 1 [Source:HGNC Symbol;Acc:20081]                                                                                           | -2.241463219 | -3.559220967 |
| E2F7     | E2F transcription factor 7 [Source:HGNC Symbol;Acc:23820]                                                                                                                  | -2.240348237 | -2.753184872 |
| ANKRD32  | ankyrin repeat domain 32 [Source:HGNC Symbol;Acc:25408]                                                                                                                    | -2.336187563 | -2.239382838 |
| TIMELESS | timeless circadian clock [Source:HGNC Symbol;Acc:11813]                                                                                                                    | -2.239351258 | -2.527283518 |
| NUP50    | nucleoporin 50kDa [Source:HGNC Symbol;Acc:8065]                                                                                                                            | -2.241732437 | -2.237552617 |
| THBS4    | thrombospondin 4 [Source:HGNC Symbol;Acc:11788]                                                                                                                            | -3.302022143 | -2.235367308 |
| SPAG5    | sperm associated antigen 5 [Source:HGNC Symbol;Acc:13452]                                                                                                                  | -2.45307556  | -2.234909649 |
| PSMC3IP  | PSMC3 interacting protein [Source:HGNC Symbol;Acc:17928]                                                                                                                   | -2.230801668 | -2.545006103 |
| ILF3     | interleukin enhancer binding factor 3, 90kDa [Source:HGNC Symbol;Acc:6038]                                                                                                 | -2.229646311 | -2.388231533 |
| RNF144A  | ring finger protein 144A [Source:HGNC Symbol;Acc:20457]                                                                                                                    | -2.227575671 | -3.473033944 |
| EPB41L2  | erythrocyte membrane protein band 4.1-like 2 [Source:HGNC Symbol;Acc:3379]                                                                                                 | -2.6445657   | -2.223204374 |

|              |                                                                                                     |              |              |
|--------------|-----------------------------------------------------------------------------------------------------|--------------|--------------|
| NCRNA00201   | HNRNPU antisense RNA 1 [Source:HGNC Symbol;Acc:27651]                                               | -2.828809691 | -2.222269651 |
| ASPM         | asp (abnormal spindle) homolog, microcephaly associated (Drosophila) [Source:HGNC Symbol;Acc:19048] | -2.222066926 | -2.233170218 |
| SMC2         | structural maintenance of chromosomes 2 [Source:HGNC Symbol;Acc:14011]                              | -2.221850829 | -2.490659444 |
| BCL2L11      | BCL2-like 11 (apoptosis facilitator) [Source:HGNC Symbol;Acc:994]                                   | -2.83952762  | -2.220318315 |
| FAM49A       | family with sequence similarity 49, member A [Source:HGNC Symbol;Acc:25373]                         | -2.220255555 | -4.032175602 |
| NUF2         | NUF2, NDC80 kinetochore complex component, homolog (S. cerevisiae) [Source:HGNC Symbol;Acc:14621]   | -2.219527572 | -2.413752347 |
| KIF11        | kinesin family member 11 [Source:HGNC Symbol;Acc:6388]                                              | -2.216932811 | -2.642091739 |
| PSAT1        | phosphoserine aminotransferase 1 [Source:HGNC Symbol;Acc:19129]                                     | -2.78828642  | -2.214870693 |
| RFC5         | replication factor C (activator 1) 5, 36.5kDa [Source:HGNC Symbol;Acc:9973]                         | -2.214786116 | -2.422431456 |
| C6orf174     | SOGA family member 3 [Source:HGNC Symbol;Acc:21494]                                                 | -2.214281499 | -4.39442214  |
| HAUS5        | HAUS augmin-like complex, subunit 5 [Source:HGNC Symbol;Acc:29130]                                  | -2.214088142 | -2.83283596  |
| MAP7         | microtubule-associated protein 7 [Source:HGNC Symbol;Acc:6869]                                      | -4.169013574 | -2.210358933 |
| NCAPD2       | non-SMC condensin I complex, subunit D2 [Source:HGNC Symbol;Acc:24305]                              | -2.29243702  | -2.204773339 |
| RNF182       | ring finger protein 182 [Source:HGNC Symbol;Acc:28522]                                              | -2.203423456 | -2.697909545 |
| RFC3         | replication factor C (activator 1) 3, 38kDa [Source:HGNC Symbol;Acc:9971]                           | -2.464885304 | -2.200561979 |
| SYT1         | synaptotagmin I [Source:HGNC Symbol;Acc:11509]                                                      | -2.190091588 | -2.845890938 |
| RPL31        | ribosomal protein L31 [Source:HGNC Symbol;Acc:10334]                                                | -2.18385781  | -2.250515188 |
| RPRML        | reprimin-like [Source:HGNC Symbol;Acc:32422]                                                        | -2.182478038 | -3.949806825 |
| TTYH1        | tweety homolog 1 (Drosophila) [Source:HGNC Symbol;Acc:13476]                                        | -2.181136547 | -4.963133288 |
| STIL         | SCL/TAL1 interrupting locus [Source:HGNC Symbol;Acc:10879]                                          | -2.576796319 | -2.17462472  |
| MELK         | maternal embryonic leucine zipper kinase [Source:HGNC Symbol;Acc:16870]                             | -2.174256831 | -2.192468834 |
| TET1         | tet methylcytosine dioxygenase 1 [Source:HGNC Symbol;Acc:29484]                                     | -3.762141846 | -2.173289446 |
| BRIP1        | BRCA1 interacting protein C-terminal helicase 1 [Source:HGNC Symbol;Acc:20473]                      | -2.17006504  | -2.252063078 |
| RIF1         | RAP1 interacting factor homolog (yeast) [Source:HGNC Symbol;Acc:23207]                              | -2.874039382 | -2.16906343  |
| IFITM1       | interferon induced transmembrane protein 1 [Source:HGNC Symbol;Acc:5412]                            | -5.001258855 | -2.166445875 |
| PKN3         | protein kinase N3 [Source:HGNC Symbol;Acc:17999]                                                    | -2.176247152 | -2.159476621 |
| NASP         | nuclear autoantigenic sperm protein (histone-binding) [Source:HGNC Symbol;Acc:7644]                 | -2.306745422 | -2.158105682 |
| TDP1         | tyrosyl-DNA phosphodiesterase 1 [Source:HGNC Symbol;Acc:18884]                                      | -2.626868416 | -2.157314924 |
| RBMX         | RNA binding motif protein, X-linked [Source:HGNC Symbol;Acc:9910]                                   | -2.156171602 | -2.291295609 |
| CCDC136      | coiled-coil domain containing 136 [Source:HGNC Symbol;Acc:22225]                                    | -2.136027865 | -2.233196764 |
| 41155        | N/A                                                                                                 | -2.135658418 | -3.728140727 |
| TMEM132B     | transmembrane protein 132B [Source:HGNC Symbol;Acc:29397]                                           | -2.493342377 | -2.135477369 |
| GINS2        | GINS complex subunit 2 (Psf2 homolog) [Source:HGNC Symbol;Acc:24575]                                | -2.13008454  | -2.76944041  |
| MRE11A       | MRE11 meiotic recombination 11 homolog A (S. cerevisiae) [Source:HGNC Symbol;Acc:7230]              | -2.210055664 | -2.129763061 |
| MCM4         | minichromosome maintenance complex component 4 [Source:HGNC Symbol;Acc:6947]                        | -2.438621806 | -2.128408579 |
| ZNF100       | zinc finger protein 100 [Source:HGNC Symbol;Acc:12880]                                              | -2.128139502 | -2.444876203 |
| HMMR         | hyaluronan-mediated motility receptor (RHAMM) [Source:HGNC Symbol;Acc:5012]                         | -3.146181828 | -2.126014518 |
| GSG2         | germ cell associated 2 (haspin) [Source:HGNC Symbol;Acc:19682]                                      | -2.51332707  | -2.125017233 |
| HNRNPA1      | heterogeneous nuclear ribonucleoprotein A1 [Source:HGNC Symbol;Acc:5031]                            | -2.128228985 | -2.124985642 |
| SUV39H2      | suppressor of variegation 3-9 homolog 2 (Drosophila) [Source:HGNC Symbol;Acc:17287]                 | -2.115627579 | -2.834962036 |
| CDC45        | cell division cycle 45 [Source:HGNC Symbol;Acc:1739]                                                | -2.11346827  | -2.238623225 |
| SAAL1        | serum amyloid A-like 1 [Source:HGNC Symbol;Acc:25158]                                               | -2.174569032 | -2.112885766 |
| CCDC150      | coiled-coil domain containing 150 [Source:HGNC Symbol;Acc:26834]                                    | -2.110986812 | -2.197094608 |
| EPB41        | erythrocyte membrane protein band 4.1 (elliptocytosis 1, RH-linked) [Source:HGNC Symbol;Acc:3377]   | -2.110132195 | -3.122737968 |
| CDCA7L       | cell division cycle associated 7-like [Source:HGNC Symbol;Acc:30777]                                | -3.171393909 | -2.109082224 |
| ATPBD4       | ATP binding domain 4 [Source:HGNC Symbol;Acc:30543]                                                 | -2.996330975 | -2.108971376 |
| FAM108B1     | family with sequence similarity 108, member B1 [Source:HGNC Symbol;Acc:24278]                       | -2.712689621 | -2.107826826 |
| ITGB3BP      | integrin beta 3 binding protein (beta3-endonexin) [Source:HGNC Symbol;Acc:6157]                     | -2.106588892 | -2.135475294 |
| RF4          | replication factor C (activator 1) 4, 37kDa [Source:HGNC Symbol;Acc:9972]                           | -2.320674997 | -2.104170286 |
| MUTYH        | mutY homolog (E. coli) [Source:HGNC Symbol;Acc:7527]                                                | -2.597327663 | -2.101936967 |
| CAMTA1       | calmodulin binding transcription activator 1 [Source:HGNC Symbol;Acc:18806]                         | -2.097765105 | -3.027713194 |
| SGOL1        | shugoshin-like 1 (S. pombe) [Source:HGNC Symbol;Acc:25088]                                          | -2.328737052 | -2.096917561 |
| LOC100509382 | putative tubulin beta-4q chain-like                                                                 | -2.614749369 | -2.09637035  |
| DDIT4        | DNA-damage-inducible transcript 4 [Source:HGNC Symbol;Acc:24944]                                    | -3.911478645 | -2.091862493 |
| KCNK5        | potassium channel, subfamily K, member 5 [Source:HGNC Symbol;Acc:6280]                              | -4.857163076 | -2.091108819 |
| ZIK1         | zinc finger protein interacting with K protein 1 [Source:HGNC Symbol;Acc:33104]                     | -2.090491253 | -2.349948101 |
| LEMD1        | LEM domain containing 1 [Source:HGNC Symbol;Acc:18725]                                              | -2.514779333 | -2.090332987 |
| LONRF1       | LON peptidase N-terminal domain and ring finger 1 [Source:HGNC Symbol;Acc:26302]                    | -2.249790332 | -2.088701418 |
| SYT14        | synaptotagmin XIV [Source:HGNC Symbol;Acc:23143]                                                    | -2.505408018 | -2.088226107 |
| FANCA        | Fanconi anemia, complementation group A [Source:HGNC Symbol;Acc:3582]                               | -2.189838774 | -2.087890943 |
| GNAX         | guanine nucleotide binding protein (G protein), alpha z polypeptide [Source:HGNC Symbol;Acc:4395]   | -2.08747227  | -2.823795805 |
| TRIM59       | tripartite motif containing 59 [Source:HGNC Symbol;Acc:30834]                                       | -2.356201289 | -2.084866139 |
| MAGOHB       | mago-nashi homolog, proliferation-associated (Drosophila) [Source:HGNC Symbol;Acc:6815]             | -2.078991196 | -2.945580305 |
| ZNF331       | zinc finger protein 331 [Source:HGNC Symbol;Acc:15489]                                              | -3.100962704 | -2.078110155 |
| PAK3         | p21 protein (Cdc42/Rac)-activated kinase 3 [Source:HGNC Symbol;Acc:8592]                            | -2.076337565 | -3.633193459 |
| FAM161A      | family with sequence similarity 161, member A [Source:HGNC Symbol;Acc:25808]                        | -2.074982962 | -2.799760046 |
| FGD4         | FYVE, RhoGEF and PH domain containing 4 [Source:HGNC Symbol;Acc:19125]                              | -2.793963741 | -2.073599517 |
| SEPHS1       | selenophosphate synthetase 1 [Source:HGNC Symbol;Acc:19685]                                         | -2.866451237 | -2.070318234 |
| FKBP5        | FK506 binding protein 5 [Source:HGNC Symbol;Acc:3721]                                               | -2.58116352  | -2.070251045 |
| CHRD1        | chordin-like 1 [Source:HGNC Symbol;Acc:29861]                                                       | -2.06820709  | -2.203120963 |
| DPYSL2       | dihydropyrimidinase-like 2 [Source:HGNC Symbol;Acc:3014]                                            | -2.066905978 | -3.053793106 |
| TACC3        | transforming, acidic coiled-coil containing protein 3 [Source:HGNC Symbol;Acc:11524]                | -2.066179372 | -2.089537568 |
| OLFML2B      | olfactomedin-like 2B [Source:HGNC Symbol;Acc:24558]                                                 | -2.061999133 | -2.53900979  |
| ZNF85        | zinc finger protein 85 [Source:HGNC Symbol;Acc:13160]                                               | -2.306112684 | -2.061702315 |

|          |                                                                                                             |              |              |
|----------|-------------------------------------------------------------------------------------------------------------|--------------|--------------|
| CDO1     | cysteine dioxygenase, type I [Source:HGNC Symbol;Acc:1795]                                                  | -2.058034315 | -2.673572635 |
| NOTCH1   | notch 1 [Source:HGNC Symbol;Acc:7881]                                                                       | -2.056368642 | -2.630689214 |
| TRDMT1   | tRNA aspartic acid methyltransferase 1 [Source:HGNC Symbol;Acc:2977]                                        | -2.051341839 | -2.244903859 |
| FNBP1L   | formin binding protein 1-like [Source:HGNC Symbol;Acc:20851]                                                | -2.842914145 | -2.051292175 |
| SLC16A9  | solute carrier family 16, member 9 (monocarboxylic acid transporter 9) [Source:HGNC Symbol;Acc:23520]       | -2.050571445 | -3.690382532 |
| NXT2     | nuclear transport factor 2-like export factor 2 [Source:HGNC Symbol;Acc:18151]                              | -2.419622556 | -2.048151847 |
| TCF3     | transcription factor 3 (E2A immunoglobulin enhancer binding factors E12/E47) [Source:HGNC Symbol;Acc:11633] | -2.048141663 | -2.401936791 |
| C7orf68  | hypoxia inducible lipid droplet-associated [Source:HGNC Symbol;Acc:28859]                                   | -2.045540552 | -2.469271384 |
| PTPRN2   | protein tyrosine phosphatase, receptor type, N polypeptide 2 [Source:HGNC Symbol;Acc:9677]                  | -2.04509321  | -6.221786533 |
| GJB7     | gap junction protein, beta 7, 25kDa [Source:HGNC Symbol;Acc:16690]                                          | -2.201536494 | -2.042642424 |
| SHMT1    | serine hydroxymethyltransferase 1 (soluble) [Source:HGNC Symbol;Acc:10850]                                  | -2.379192416 | -2.041838417 |
| UBE2C    | ubiquitin-conjugating enzyme E2C [Source:HGNC Symbol;Acc:15937]                                             | -2.24597532  | -2.040975304 |
| TMX1     | thioredoxin-related transmembrane protein 1 [Source:HGNC Symbol;Acc:15487]                                  | -2.058703611 | -2.039255355 |
| TMEM48   | transmembrane protein 48 [Source:HGNC Symbol;Acc:25525]                                                     | -2.192736742 | -2.037843804 |
| UHRF1    | ubiquitin-like with PHD and ring finger domains 1 [Source:HGNC Symbol;Acc:12556]                            | -2.035987062 | -3.446516416 |
| CDCA2    | cell division cycle associated 2 [Source:HGNC Symbol;Acc:14623]                                             | -2.273553844 | -2.034295447 |
| PRR11    | proline rich 11 [Source:HGNC Symbol;Acc:25619]                                                              | -2.034242806 | -2.138530144 |
| ESCO2    | establishment of cohesion 1 homolog 2 (S. cerevisiae) [Source:HGNC Symbol;Acc:27230]                        | -2.033528812 | -2.26936026  |
| SYNCRIP  | synaptotagmin binding, cytoplasmic RNA interacting protein [Source:HGNC Symbol;Acc:16918]                   | -2.185141019 | -2.028384683 |
| AMD1     | adenosylmethionine decarboxylase 1 [Source:HGNC Symbol;Acc:457]                                             | -2.364759511 | -2.026018326 |
| SGK494   | uncharacterized serine/threonine-protein kinase Sgk494 [Source:RefSeq peptide;Acc:NP_001167574]             | -2.538704382 | -2.024955371 |
| HNRNPC   | heterogeneous nuclear ribonucleoprotein C (C1/C2) [Source:HGNC Symbol;Acc:5035]                             | -2.021932058 | -2.067820846 |
| TMEM132D | transmembrane protein 132D [Source:HGNC Symbol;Acc:29411]                                                   | -2.017738345 | -2.717078719 |
| RARRES2  | retinoic acid receptor responder (tazarotene induced) 2 [Source:HGNC Symbol;Acc:9868]                       | -2.659586218 | -2.016906431 |
| PHLPP1   | PH domain and leucine rich repeat protein phosphatase 1 [Source:HGNC Symbol;Acc:20610]                      | -2.579503845 | -2.016256019 |
| ZNF826P  | zinc finger protein 826, pseudogene [Source:HGNC Symbol;Acc:33875]                                          | -2.786720511 | -2.01605884  |
| CCNB1    | cyclin B1 [Source:HGNC Symbol;Acc:1579]                                                                     | -2.008895861 | -2.017150384 |
| FOXM1    | forkhead box M1 [Source:HGNC Symbol;Acc:3818]                                                               | -2.007431147 | -2.42727041  |
| KIF4A    | kinesin family member 4A [Source:HGNC Symbol;Acc:13339]                                                     | -2.005417713 | -2.764455004 |
| KHDRBS2  | KH domain containing, RNA binding, signal transduction associated 2 [Source:HGNC Symbol;Acc:18114]          | -2.003281259 | -3.446452148 |
| TKT      | transketolase [Source:HGNC Symbol;Acc:11834]                                                                | -2.760988944 | -2.002753037 |
| RAB39B   | RAB39B, member RAS oncogene family [Source:HGNC Symbol;Acc:16499]                                           | -2.064679165 | -2.001740133 |
| ZNF642   | ZFP69 zinc finger protein [Source:HGNC Symbol;Acc:24708]                                                    | -2.00079959  | -2.158592559 |
| BTBD3    | BTB (POZ) domain containing 3 [Source:HGNC Symbol;Acc:15854]                                                | -2.00024959  | -2.010816369 |
| ARL6IP1  | ADP-ribosylation factor-like 6 interacting protein 1 [Source:HGNC Symbol;Acc:697]                           | -2.00024308  | -2.371989186 |
| ZNF708   | zinc finger protein 708 [Source:HGNC Symbol;Acc:12945]                                                      | -2.125541277 | -2.000223939 |
