# Supplementary material
Source: PubMed Central journal article supplement (PMC3973069)
Supplement: 13238_2013_16_MOESM16_ESM.pdf [file 13238_2013_16_MOESM16_ESM.pdf]

| Gene Name | Description and ID                                                                                                        | DNA methylation |          |         | Gene expression |             |
|-----------|---------------------------------------------------------------------------------------------------------------------------|-----------------|----------|---------|-----------------|-------------|
|           |                                                                                                                           | ES-mCpG         | NSC-mCpG | CM-mCpG | CM vs ES        | CM vs NSC   |
| POPCD2    | popeye domain containing 2 [Source:HGNC Symbol;Acc:17648]                                                                 | 0.93            | 0.94     | 0.53    | 8.402616293     | 7.562352603 |
| ALPK2     | alpha-kinase 2 [Source:HGNC Symbol;Acc:20565]                                                                             | 0.78            | 0.59     | 0.25    | 8.069528368     | 3.647151766 |
| TRIM55    | tripartite motif containing 55 [Source:HGNC Symbol;Acc:14215]                                                             | 0.89            | 0.67     | 0.34    | 7.373137025     | 7.267597143 |
| ASPH      | aspartate beta-hydroxylase [Source:HGNC Symbol;Acc:757]                                                                   | 0.83            | 0.93     | 0.53    | 4.281290866     | 3.122582294 |
| FILIP1    | filamin A interacting protein 1 [Source:HGNC Symbol;Acc:21015]                                                            | 0.91            | 0.75     | 0.54    | 6.920428571     | 7.794390913 |
| HSPB7     | heat shock 27kDa protein family, member 7 (cardiovascular) [Source:HGNC Symbol;Acc:5249]                                  | 0.91            | 0.74     | 0.53    | 6.447867991     | 6.295762763 |
| NPPA      | natriuretic peptide A [Source:HGNC Symbol;Acc:7939]                                                                       | 0.93            | 0.91     | 0.73    | 7.983519001     | 8.03271611  |
| KBTBD10   | kelch-like 41 (Drosophila) [Source:HGNC Symbol;Acc:16905]                                                                 | 0.9             | 0.91     | 0.72    | 2.910404942     | 2.670527553 |
| MYL4      | myosin, light chain 4, alkali; atrial, embryonic [Source:HGNC Symbol;Acc:7585]                                            | 0.92            | 0.81     | 0.64    | 9.22112583      | 9.002175408 |
| CRYAB     | crystallin, alpha B [Source:HGNC Symbol;Acc:2389]                                                                         | 0.94            | 0.85     | 0.68    | 5.935066651     | 6.305402948 |
| LRRN4     | leucine rich repeat neuronal 4 [Source:HGNC Symbol;Acc:16208]                                                             | 0.68            | 0.71     | 0.53    | 2.491450066     | 2.533850351 |
| MYO22     | myozenin 2 [Source:HGNC Symbol;Acc:1330]                                                                                  | 0.97            | 0.96     | 0.83    | 9.48535322      | 9.510284971 |
| OBSCN     | obscurin, cytoskeletal calmodulin and titin-interacting RhoGEF [Source:HGNC Symbol;Acc:15719]                             | 0.9             | 0.86     | 0.73    | 2.598541342     | 2.401037422 |
| SMPX      | small muscle protein, X-linked [Source:HGNC Symbol;Acc:11122]                                                             | 0.92            | 0.85     | 0.73    | 9.91336154      | 9.678290914 |
| NRK       | Nik related kinase [Source:HGNC Symbol;Acc:25391]                                                                         | 0.48            | 0.51     | 0.38    | 2.403506377     | 4.248352806 |
| ABLIM1    | actin binding LIM protein 1 [Source:HGNC Symbol;Acc:78]                                                                   | 0.83            | 0.83     | 0.73    | 2.257898689     | 2.653017499 |
| SYNPO2L   | synaptopodin 2-like [Source:HGNC Symbol;Acc:23532]                                                                        | 0.9             | 0.93     | 0.82    | 9.25673506      | 9.420535272 |
| ANKRD1    | ankyrin repeat domain 1 (cardiac muscle) [Source:HGNC Symbol;Acc:15819]                                                   | 0.25            | 0.18     | 0.1     | 9.714009013     | 8.638574866 |
| TNNI1     | troponin I type 1 (skeletal, slow) [Source:HGNC Symbol;Acc:11945]                                                         | 0.79            | 0.7      | 0.62    | 6.705106323     | 6.794815577 |
| MYH6      | myosin, heavy chain 6, cardiac muscle, alpha [Source:HGNC Symbol;Acc:7576]                                                | 0.87            | 0.76     | 0.69    | 9.518535857     | 9.794227963 |
| ABRA      | actin-binding Rho activating protein [Source:HGNC Symbol;Acc:30655]                                                       | 0.97            | 0.92     | 0.85    | 5.464788018     | 5.340692628 |
| TPM1      | tropomyosin 1 (alpha) [Source:HGNC Symbol;Acc:12010]                                                                      | 0.77            | 0.88     | 0.7     | 3.637236226     | 6.143185497 |
| C15orf52  | chromosome 15 open reading frame 52 [Source:HGNC Symbol;Acc:33488]                                                        | 0.87            | 0.91     | 0.8     | 5.192978911     | 5.918630472 |
| MYOM1     | myomesin 1 [Source:HGNC Symbol;Acc:7613]                                                                                  | 0.92            | 0.9      | 0.84    | 5.928375111     | 5.942358498 |
| MASP1     | mannan-binding lectin serine peptidase 1 (C4/C2 activating component of Ra-reactive factor) [Source:HGNC Symbol;Acc:6901] | 0.54            | 0.49     | 0.43    | 7.240842303     | 6.569487061 |
| MYBPC3    | myosin binding protein C, cardiac [Source:HGNC Symbol;Acc:7551]                                                           | 0.89            | 0.83     | 0.77    | 6.01967711      | 6.115402912 |
| TNS1      | tensin 1 [Source:HGNC Symbol;Acc:11973]                                                                                   | 0.74            | 0.62     | 0.57    | 2.641474521     | 2.546919208 |
| FLNC      | filamin C, gamma [Source:HGNC Symbol;Acc:3756]                                                                            | 0.23            | 0.32     | 0.18    | 5.199968343     | 4.370411535 |
| F2RL2     | coagulation factor II (thrombin) receptor-like 2 [Source:HGNC Symbol;Acc:3539]                                            | 0.64            | 0.22     | 0.17    | 3.218976947     | 3.106845011 |
