# Supplementary material
Source: PubMed Central journal article supplement (PMC3973069)
Supplement: 13238_2013_16_MOESM20_ESM.pdf [file 13238_2013_16_MOESM20_ESM.pdf]

| <b>Genes</b>   | <b>Sequences</b>        |
|----------------|-------------------------|
| ACTA2-qpcr-F   | GTGTTGCCCTGAAGAGCAT     |
| ACTA2-qpcr-R   | GCTGGGACATTGAAAGTCTCA   |
| CASQ2-qpcr-F   | GGCAGAAGAGGGGCTTAATTT   |
| CASQ2-qpcr-R   | GAAGACACCGGCTCATGGTAG   |
| CREM-qpcr-F    | ACACCACCTAGTATTGCTACCA  |
| CREM-qpcr-R    | GGATTGTTCCACCTTGGGCTAT  |
| CSRP3-qpcr-F   | CCTGTGAAAAGACCGTCTACC   |
| CSRP3-qpcr-R   | GTCGTGCTGTCAAGAGCCT     |
| DTNA-qpcr-F    | TACCCACGGAAGTTTTGGAGG   |
| DTNA-qpcr-R    | GGATCTGACATAAGCGTGTCC   |
| EYA4-qpcr-F    | CTTCTTGCAGTCAAACAGAGC   |
| EYA4-qpcr-R    | GTGGATAGGGCTTGAAGGAT    |
| FBXO32-qpcr-F  | GCCTTTGTGCCTACAACCTGAA  |
| FBXO32-qpcr-R  | CTGCCCTTTGTCTGACAGAAT   |
| GATA4-qpcr-F   | CGACACCCCAATCTCGATATG   |
| GATA4-qpcr-R   | GTTGCACAGATAGTGACCCGT   |
| GATA5-qpcr-F   | CTTCGTGTCCGACTTCTTGA    |
| GATA5-qpcr-R   | CCGAGGCATTCTTGTGGA      |
| GATA6-qpcr-F   | CTCAGTTCCTACGCTTCGCAT   |
| GATA6-qpcr-R   | GTCGAGGTCAGTGAACAGCA    |
| HAND2-qpcr-F   | CGCCGACACCAAACCTCTCC    |
| HAND2-qpcr-R   | TCGCCATTCTGGTCTGCTCT    |
| HECW2-qpcr-F   | AAATCCCCAGATGCGGTACAC   |
| HECW2-qpcr-R   | CGGCTCTCAGAAGTCACCA     |
| ISL1-qpcr-F    | GCGGAGTGTAATCAGTATTTGGA |
| ISL1-qpcr-R    | GCATTTGATCCCGTACAACCT   |
| KCNA5-qpcr-F   | CGCGTCCACATCAACATCTC    |
| KCNA5-qpcr-R   | GGTAGAAGCGTATCTCGTCCG   |
| LBH-qpcr-F     | GCCCCGACTATCTGAGATCG    |
| LBH-qpcr-R     | GCGGTCAAATCTGACGGGT     |
| LDB3-qpcr-F    | CTATCTCCCGGATCACACCAG   |
| LDB3-qpcr-R    | GTGAGGCTCAAGTTGTAGCTG   |
| LEFTY2-qpcr-F  | TGGACCTCAGGGACTATGGAG   |
| LEFTY2-qpcr-R  | CCGAGGCGATACTACTGTCTG   |
| MARCH11-qpcr-F | CCGGGGAGAGTCTTCCACA     |
| MARCH11-qpcr-R | GCCTCATCCGATTGAACAGGT   |
| MEF2A-qpcr-F   | ACTACAGACCTCACAGTGCCA   |
| MEF2A-qpcr-R   | GCCTAAGCTATTTGCACCAGT   |
| MEF2C-qpcr-F   | CCAACTTCGAGATGCCAGTCT   |
| MEF2C-qpcr-R   | GTCGATGTGTTACACCAGGAG   |
| MIR21-qpcr-F   | CTGCCTGACTGTCTGCTTGT    |

|                 |                            |
|-----------------|----------------------------|
| MIR21-qpcr-R    | AGATTCAACAGTCAACATCAGTCTGA |
| MITF-qpcr-F     | CAGTCCGAATCGGGGATCG        |
| MITF-qpcr-R     | TGCTCTTCAGCGGTTGACTTT      |
| MYBPC3-qpcr-F   | CCATGACGCTGAGGTCAAATG      |
| MYBPC3-qpcr-R   | GCTTGGCACCGATGGACTC        |
| MYOCD-qpcr-F    | ACGGATGCTTTTGCCTTTGAA      |
| MYOCD-qpcr-R    | AACCTGTCTGAAGGGGTATCTG     |
| MYOZ2-qpcr-F    | CCAGGCTATTTAAGATGCGTCA     |
| MYOZ2-qpcr-R    | CCTTCCAAGTTACTTCCATCCAC    |
| NEXN-qpcr-F     | ACTGTGAAGGGTAGATTTGCTG     |
| NEXN-qpcr-R     | TTCTGCGTTTTTCGTTCTCCT      |
| NKX2-5-qpcr-F   | CCAAGGACCCTAGAGCCGAA       |
| NKX2-5-qpcr-R   | ATAGGCGGGGTAGGCGTTAT       |
| NPPA-qpcr-F     | CAACGCAGACCTGATGGATTT      |
| NPPA-qpcr-R     | AGCCCCGCTTCTTCATTC         |
| NPPB-qpcr-F     | TGGAAACGTCCGGGTTACAG       |
| NPPB-qpcr-R     | CTGATCCGGTCCATCTTCCT       |
| PCGF5-qpcr-F    | AGCCAACAACAGTGACGGAAT      |
| PCGF5-qpcr-R    | TGAACTTGTTGCCACACCTT       |
| PLN-qpcr-F      | ACCTCACTCGCTCAGCTATAA      |
| PLN-qpcr-R      | CATCACGATGATACAGATCAGCA    |
| PPAPDC3-qpcr-F  | AGCTGAACCCCTCCTTCAAG       |
| PPAPDC3-qpcr-R  | CCGATGACAAAGCCGGAGA        |
| PPARGC1A-qpcr-F | TCTGAGTCTGTATGGAGTGACAT    |
| PPARGC1A-qpcr-R | CCAAGTCGTTACATCTAGTTCA     |
| PRICKLE1-qpcr-F | TTTGCTTGCTTACCAGAGGAAA     |
| PRICKLE1-qpcr-R | ACTGGCAATACCGTACCTCAT      |
| RARB-qpcr-F     | TCCGAAAAGCTCACCAGGAAA      |
| RARB-qpcr-R     | GGCCAGTTCACTGAATTTGTCC     |
| SMAD6-qpcr-F    | GCTACCAACTCCCTCATCACT      |
| SMAD6-qpcr-R    | CGTACACCGCATAGAGGCG        |
| SMAD7-qpcr-F    | TTCCTCCGCTGAAACAGGG        |
| SMAD7-qpcr-R    | CCTCCCAGTATGCCACCAC        |
| SNTA1-qpcr-F    | TGCTCCTCTACTTGTCTCTCC      |
| SNTA1-qpcr-R    | TCTGCATCGTAGGGCACTGA       |
| STAT4-qpcr-F    | TGTTGGCCCAATGGATTGAAA      |
| STAT4-qpcr-R    | GGAAACACGACCTAACTGTTTTCAT  |
| TBX2-qpcr-F     | GCTGACGATTGCCGCTATAAG      |
| TBX2-qpcr-R     | GGCTGTCTGGGTGGATGTA        |
| TCEA3-qpcr-F    | AAGAGCACGGACATGAAGTACC     |
| TCEA3-qpcr-R    | CTCTGCCGTCATCTTGCTA        |
| TNNT2-qpcr-F    | GGAGGAGTCCAAACCAAAGCC      |

|               |                       |
|---------------|-----------------------|
| TNNT2-qpcr-R  | TCAAAGTCCACTCTCTCCATC |
| TRIM63-qpcr-F | CTTCCAGGCTGCAAATCCCTA |
| TRIM63-qpcr-R | ACACTCCGTGACGATCCATGA |
| TTN-qpcr-F    | CCCCATCGCCATAAGACAC   |
| TTN-qpcr-R    | CCACGTAGCCCTCTTGCTTC  |
| XPO4-qpcr-F   | ATTCAGCGTTACCTTGCACT  |
| XPO4-qpcr-R   | CAGCACATTTTGCAGGATTC  |
| ZFPM2-qpcr-F  | GGCCTGAAAATCTGAGCTGC  |
| ZFPM2-qpcr-R  | CAGTCGTCTGTCTCAACTCCA |

---
